# Supplementary material for: Acute Endotoxin-Induced Thymic Atrophy Is Characterized By Intrathymic Inflammatory and Wound Healing Responses
Source: PubMed Central journal article supplement (PMC3060875; doi:10.1371/journal.pone.0017940), 2011-03-18
Supplement: pone.0017940.s009.pdf [file pone.0017940.s009.pdf]

## User Data

### Networks

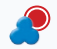

**Up-regulated (+)**  
Object has user data with positive value

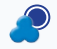

**Down-regulated (-)**  
Object has user data with negative value

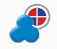

**Mixed-signal (+/-)**  
Object has user data with both positive and negative values

### Maps

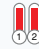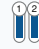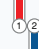

## Network Objects

### Enzymes

Generic enzyme

#### KINASE

Generic kinase

Protein kinase

Lipid kinase

#### PHOSPHATASE

Generic phosphatase  
Protein phosphatase  
Lipid phosphatase

#### PHOSPHOLIPASE

Generic phospholipase

#### PROTEASE

Generic protease

Metalloprotease

#### GTPase

G-alpha

RAS - superfamily

### Generic Classes

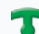

Receptor ligand

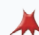

Transcription factor

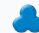

Protein

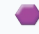

Compound

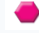

Predicted metabolite or user's structure

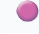

Inorganic ion

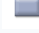

Reaction

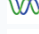

DNA

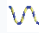

RNA

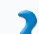

Generic binding protein

### Channels/Transporters

Generic channel

Ligand-gated ion channel

Voltage-gated ion channel

Transporter

### Receptors

Generic

GPCR

Receptors with kinase activity

### Groups of Objects

**A complex or a group**  
Proteins physically connected into a complex or related as a family

**Logical association**  
Proteins linked by logical relations or physical interactions

**Custom association**  
Group of collapsed objects chosen by user

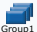

### Other Marks

**Red circle**  
The links terminated due to a restriction of the number of steps in network expansion.

**Blue circle**  
The links terminated due to network truncation.

## Interactions Between Objects

### Effects

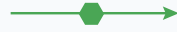

Positive / activation

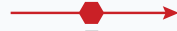

Negative / inhibition

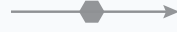

Unspecified

### Mechanisms

#### PHYSICAL INTERACTIONS

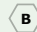

**Binding**  
Compound binds the enzyme or receptor

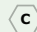

**Cleavage**  
Cleavage of a protein at a specific site yielding distinctive peptide fragments. Proteolytic cleavage can be carried out by both enzymes and compounds

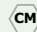

**Covalent modifications**  
Protein activity regulation by covalent binding of a small chemical group to the aminoacids of an active site.

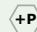

**Phosphorylation**  
Protein activity is altered via addition of a phosphate group

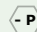

**Dephosphorylation**  
Protein activity is altered via removal of a phosphate group

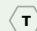

**Transformation**  
Protein activity regulation by binding & hydrolysis of GTP

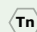

**Transport**  
Transport of a protein or a compound between organelles

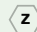

**Catalysis**  
Catalysis of an enzymatic reaction

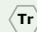

**Transcription regulation**  
Physical binding of a transcription factor to target gene's promoter

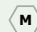

**MicroRNA binding**  
Regulation of gene expression by binding of microRNA to target mRNA

#### FUNCTIONAL INTERACTIONS

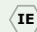

**Influence on expression**  
Compounds change the expression level of target genes indirectly, for instance by binding to upstream receptors

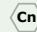

**Competition**  
Protein activity regulation by competition at the substrate binding site

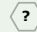

**Unspecified interactions**  
Mechanism is unknown or/and effect is indirect

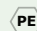

**Drug-Drug interactions. Pharmacological effect**  
Drugs change pharmacological effects of other drugs, for instance by competing for drug metabolism enzymes or organic transporters

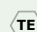

**Drug-Drug interactions. Toxic effect**  
Drugs change toxic effects of other drugs, for instance by competing for drug metabolism enzymes or organic transporters

#### LOGICAL RELATIONS

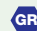

**Group relation**  
Object belongs to a generic group of related objects

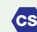

**Complex subunit**  
Protein is a subunit of a protein complex

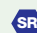

**Similarity relation**  
Chemically similar compounds with chosen Tanimoto similarity score

### Links on Networks

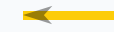

**Incoming interaction**  
When the mouse is over object, yellow link indicates direction to object

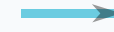

**Outgoing interaction**  
Cyan link indicates direction FROM the object

### Interactions from custom list (MetaLink™)

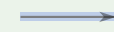

**Interaction is in the network**  
Interaction is represented by a thin solid line and is highlighted in blue

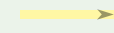

**Interaction is in the base, but not in network**  
Interaction is highlighted in yellow

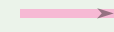

**Interaction is in the network**  
Interaction is highlighted in magenta

### Canonical pathways

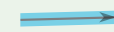

**Canonical pathway**  
The link is highlighted in a thick cyan or magenta line

### Links on Maps

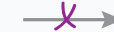

Disrupts in disease

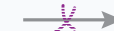

Weakens in disease

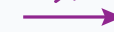

Emerges in disease

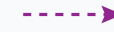

Enhances in disease

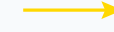

Species specific interactions

## Objects on Maps

### Localization

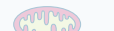

Mitochondria

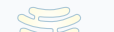

EPR

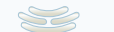

Golgi

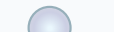

Nucleus

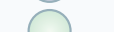

Lysosome

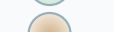

Peroxisome

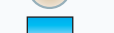

Cytoplasm

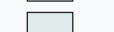

Extracellular

### Other Map Objects

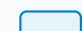

Note

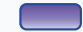

Normal process

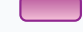

Pathological process

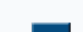

Normal map

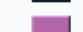

Disease map

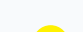

Species specific object

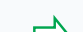

Path start

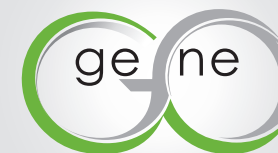

(888) 592-3124

(858) 756-7996

www.genego.com

sales@genego.com
