# Supplementary material for: Acute Endotoxin-Induced Thymic Atrophy Is Characterized By Intrathymic Inflammatory and Wound Healing Responses
Source: PLoS One. 2011 Mar 18;6(3):e17940. doi: 10.1371/journal.pone.0017940 (PMC3060875; doi:10.1371/journal.pone.0017940)
Supplement: Table S1 — Significant gene increases within thymus tissue. Following normalization, microarray data was tested using the limma Bioconductor package for linear model fitting and an empirical Bayes method of determination of statistical significance. After false discovery rate was corrected using the Benjamin-Hochberg method, significant gene expression changes (corrected p<0.05) were sorted. Shown are all genes with a mean expression level above 5 and fold changes greater than 1.4. (XLS) [file pone.0017940.s010.xls]

## Sheet: Sheet2
Table S1: Signficant gene increases within thymus tissue
ID	Gene Symbol	CON 405	CON 410	LPS 405	LPS 410	Mean	Fold Change	p-value
1427747_a_at	Lcn2	4.30165	4.9733	12.9184	12.7871	8.74511	297.195	0.00116633
1419209_at	Cxcl1	4.36329	4.36329	10.7003	10.3537	7.44514	71.6901	0.00116633
1450826_a_at	Saa3	7.03508	6.50718	13.0073	12.7533	9.82571	69.0307	0.00127207
1428942_at	Mt2	7.63292	6.36585	13.199	12.5188	9.92915	58.0625	0.00287624
1419561_at	Ccl3	3.61599	3.71809	9.50764	9.49422	6.58399	57.0396	0.00116633
1449984_at	Cxcl2	4.64056	4.87661	10.6036	10.2691	7.59748	51.1897	0.00116633
1419491_at	Defb1	5.24369	5.69637	10.624	11.3158	8.21995	45.2498	0.00178431
1419100_at	Serpina3n	5.51575	5.75308	10.9406	11.2022	8.35289	43.3196	0.00116633
1416953_at	Ctgf	5.30157	5.06162	10.2864	10.8873	7.88423	42.3786	0.00171407
1422557_s_at	Mt1	7.97664	6.95263	13.2473	12.3101	10.1217	39.7825	0.00311239
1448881_at	Hp	7.17933	8.06519	13.3445	12.5015	10.2726	39.4176	0.0025832
1420310_at	n.a.*	4.35276	4.15795	10.0757	8.93406	6.88013	38.0427	0.0024672
1450297_at	Il6	3.41608	2.84047	8.68161	8.0319	5.74251	37.4913	0.00178431
1417851_at	Cxcl13	5.45322	5.2377	10.5551	10.293	7.88475	33.7913	0.00116633
1419492_s_at	Defb1	5.064	5.7372	9.98762	10.6614	7.86257	30.3566	0.00204399
1417408_at	F3	4.86115	4.55489	9.25924	9.95571	7.15775	29.8458	0.00178431
1437534_at	n.a.*	3.02679	2.69931	7.97822	7.47029	5.29365	29.0649	0.00171407
1438763_at	Dnahc2	4.14746	4.40109	9.00222	9.11829	6.66726	27.5883	0.00116633
1417256_at	Mmp13	3.00326	3.507	7.71405	8.30944	5.63344	27.0324	0.00178431
1455393_at	Cp	4.97946	5.16265	9.8685	9.70915	7.42994	26.3143	0.00116633
1457644_s_at	Cxcl1	6.16473	5.86115	10.917	10.5107	8.36338	26.008	0.00171407
1458382_a_at	n.a.*	5.56681	5.38844	10.4998	9.83041	7.82136	25.7673	0.00178431
1419427_at	Csf3	4.42435	3.99921	9.33819	8.343	6.52619	24.7407	0.00275942
1458543_at	n.a.*	2.99109	3.01608	9.18929	6.05984	5.31408	24.6067	0.0242286
1434202_a_at	BC055107	4.14983	4.55895	8.74213	9.14035	6.64781	24.0315	0.00175829
1417268_at	Cd14	5.60788	5.71797	10.0465	10.3022	7.91865	22.8078	0.00119604
1423233_at	Cebpd	4.72793	4.66924	9.22405	9.1836	6.95121	22.7098	0.00116633
1421921_at	Serpina3m	3.11026	3.81207	8.39891	7.50612	5.70684	22.4921	0.00307208
1417495_x_at	Cp	5.74197	5.73078	10.3172	10.0693	7.96481	21.9612	0.00119604
1457666_s_at	Ifi202b	5.68292	5.94765	10.0114	10.4459	8.02196	21.3083	0.00171407
1449824_at	Prg4	4.76226	4.87134	9.01353	9.44463	7.02294	21.2926	0.00171407
1418945_at	Mmp3	4.10703	4.36762	8.51859	8.69971	6.42324	20.7039	0.00141336
1417494_a_at	Cp	6.20402	6.12811	10.7136	10.2807	8.33159	20.1268	0.00171407
1448734_at	Cp	4.28462	4.76635	8.75971	8.87134	6.67051	19.5628	0.0017339
1449498_at	Marco	4.40703	5.16664	8.64027	9.42094	6.90872	18.9452	0.00317887
1422953_at	Fpr-rs2	4.23982	4.73229	8.75329	8.6862	6.6029	18.8134	0.00175829
1417290_at	Lrg1	4.20655	4.66999	9.206	8.12429	6.55171	18.7248	0.00362412
1418666_at	Ptx3	3.8526	4.44533	8.76348	7.94736	6.25219	18.4616	0.00298856
1417273_at	Pdk4	4.77733	7.00796	10.0779	10.0692	7.9831	18.1376	0.0136949
1418652_at	Cxcl9	6.74201	6.24586	10.8498	10.4187	8.5641	17.6344	0.0018221
1448228_at	Lox	5.61374	5.5319	9.82942	9.58749	7.64064	17.5772	0.00141336
1420401_a_at	Ramp3	5.85064	5.57633	9.88094	9.79452	7.77561	17.4391	0.00154939
1457657_at	n.a.*	3.30307	3.31061	7.69634	7.1597	5.36743	17.402	0.00178431
1421009_at	Rsad2	5.69462	6.32192	10.2181	9.87321	8.02696	16.4199	0.00197339
1451054_at	Orm1	4.81544	5.04071	9.3441	8.58159	6.94546	16.3903	0.00227458
1460227_at	Timp1	5.32856	5.0024	9.04143	9.29403	7.1666	16.025	0.00171407
1436058_at	Rsad2	7.74678	8.57869	12.0925	12.1744	10.1481	15.6783	0.00249527
1419647_a_at	Ier3	5.8154	5.87362	9.7549	9.82582	7.81743	15.4106	0.00119604
1460197_a_at	Steap4	6.76948	7.20561	10.8482	10.9724	8.94891	15.1657	0.00178431
1427102_at	Slfn4	4.92391	5.71087	9.45984	8.99533	7.27249	15.0344	0.00292957
1422573_at	Ampd3	5.18542	5.55771	9.06861	9.4015	7.30331	14.5555	0.00178431
1419345_at	Pth	4.08393	5.83096	7.94254	9.69323	6.88767	14.5247	0.0214756
1419042_at	Iigp1	6.61986	6.73147	10.6467	10.4153	8.60332	14.4733	0.00171407
1419043_a_at	Iigp1	8.14436	8.06591	12.0887	11.8227	10.0304	14.4255	0.00171407
1417496_at	Cp	4.61968	4.33197	8.26024	8.30174	6.37841	13.9787	0.00171407
1421811_at	Thbs1	4.96055	5.4613	8.67646	9.31238	7.10267	13.7704	0.0025832
1451905_a_at	Mx1	5.60959	5.79028	9.37212	9.56171	7.58342	13.6137	0.00171407
1437867_at	n.a.*	5.34683	5.41601	9.21774	8.92641	7.22675	12.9121	0.00171407
1421551_s_at	Ifi202b	5.41771	5.78293	8.89592	9.67617	7.44318	12.8681	0.00300075
1460500_at	5033421C21Rik	4.59507	3.62158	7.99912	7.51242	5.93205	12.5311	0.00419274
1419075_s_at	Saa1	5.2813	4.651	9.03197	8.19205	6.78908	12.5174	0.00391922
1444564_at	Apod	4.38382	4.53965	7.96302	8.2422	6.28217	12.4743	0.00171407
1441150_x_at	LOC100039236	6.46004	6.89498	10.2995	10.3102	8.49117	12.3576	0.00178431
1448859_at	Cxcl13	5.68901	5.48583	9.51179	8.79172	7.36959	11.8297	0.0025832
1418126_at	Ccl5	9.03143	7.91761	12.0138	12.0474	10.2526	11.7621	0.00458498
1420394_s_at	Lilrb4	6.96741	7.32562	10.4001	10.9824	8.91888	11.67	0.00238376
1442340_x_at	Cyr61	4.44193	5.24481	8.23717	8.50486	6.60719	11.5326	0.00307208
1416468_at	Aldh1a1	4.31624	5.16265	8.27811	8.24336	6.50009	11.4819	0.00307208
1418930_at	Cxcl10	7.64562	7.39265	11.145	10.9249	9.27704	11.4382	0.00177907
1434046_at	AA467197	7.01279	6.19487	10.1329	10.0729	8.35337	11.3066	0.00302068
1420771_at	Sprr2d	5.30519	5.52581	8.80433	8.99223	7.15689	11.1795	0.00171407
1419603_at	Ifi204	3.46621	3.83532	7.16675	7.0692	5.38437	11.0595	0.00178431
1423062_at	Igfbp3	4.62106	4.88054	8.05142	8.36321	6.47906	10.9778	0.00178431
1419728_at	Cxcl5	3.58075	3.76634	7.41053	6.84254	5.40004	10.951	0.0021045
1421008_at	Rsad2	5.43738	5.88473	9.54515	8.65534	7.38065	10.8467	0.00405883
1426060_at	n.a.*	8.48397	8.29403	11.9441	11.6925	10.1037	10.7727	0.00177907
1426061_x_at	n.a.*	8.45869	8.15969	11.8866	11.574	10.0198	10.7119	0.00178431
1449025_at	Ifit3	7.75612	7.70342	11.2445	11.0526	9.43916	10.6944	0.00171407
1424923_at	Serpina3g	7.88208	7.98785	11.0665	11.6101	9.63665	10.5807	0.00197339
1419282_at	Ccl12	5.50106	5.04083	8.65415	8.69042	6.97161	10.5659	0.00178431
1437277_x_at	Tgm2	7.26792	7.09295	10.6435	10.4612	8.86637	10.3523	0.00171407
1452352_at	Ctla2b	5.17578	5.16891	8.79292	8.27863	6.85406	10.2918	0.00191006
1419334_at	Ctla4	6.56707	6.05655	9.74841	9.58462	7.98916	10.2298	0.00197339
1418674_at	Osmr	6.80465	7.38514	10.1728	10.6817	8.76108	10.0727	0.00302068
1416121_at	Lox	5.9845	6.26519	9.18965	9.72168	7.79025	10.0618	0.00226523
1416039_x_at	Cyr61	6.63955	5.84324	9.13234	9.98001	7.89879	9.95055	0.00559279
1417314_at	Cfb	5.77574	5.41488	9.11548	8.70394	7.25251	9.94796	0.00204399
1450716_at	Adamts1	4.37856	4.63807	7.6201	8.01429	6.16276	9.90997	0.00189593
1416811_s_at	Ctla2a	6.78323	6.76283	10.2095	9.95414	8.42742	9.90921	0.00175829
1420380_at	Ccl2	4.85709	4.45077	8.17835	7.71471	6.30023	9.79878	0.00239441
1433428_x_at	Tgm2	7.75579	7.36667	10.9617	10.7409	9.20626	9.78162	0.00184489
1418240_at	Gbp2	7.78062	7.89501	11.2421	10.9985	9.47906	9.73039	0.00177907
1427736_a_at	Ccrl2	5.2438	5.29609	8.71712	8.37542	6.90811	9.68886	0.00178431
1455900_x_at	Tgm2	7.64377	7.40613	10.877	10.7053	9.15803	9.62077	0.00178431
1457823_at	Cyr61	4.69085	5.30704	8.14536	8.37823	6.63037	9.59877	0.0025832
1448213_at	Anxa1	9.12228	9.25872	12.2557	12.5674	10.801	9.32467	0.00178431
1425789_s_at	Anxa8	5.29956	6.11216	8.86794	8.98141	7.31527	9.31022	0.00347341
1447839_x_at	Adm	7.43219	7.04325	10.0905	10.7999	8.84147	9.23744	0.00340497
1435906_x_at	Gbp2	7.98131	8.04095	11.2887	11.1064	9.60433	9.10342	0.00171407
1437247_at	Fosl2	5.4503	5.70552	8.57313	8.94671	7.16892	9.07572	0.00191006
1455869_at	n.a.*	9.35107	8.87247	11.9574	12.6231	10.701	9.05368	0.00356728
1452433_at	n.a.*	7.26189	7.70071	10.5537	10.7052	9.05537	8.86518	0.00196719
1418392_a_at	Gbp3	7.2539	7.35239	10.5574	10.3346	8.87457	8.83274	0.00178431
1416129_at	Errfi1	7.76133	7.91164	10.6744	11.2532	9.40014	8.73806	0.00250074
1431213_a_at	LOC100041156	9.5056	9.31837	12.205	12.8727	10.9754	8.73533	0.00302068
1419665_a_at	Nupr1	5.62104	5.98871	8.99222	8.8654	7.36684	8.71765	0.00178431
1452035_at	Col4a1	7.3388	7.31097	10.4646	10.4212	8.88389	8.68187	0.00171407
1456907_at	Cxcl9	4.50072	4.36666	7.94771	7.14417	5.98982	8.64727	0.00365538
1419149_at	Serpine1	4.39801	4.51551	8.27339	6.83838	6.00632	8.56899	0.0103735
1416010_a_at	Ehd1	6.72166	6.57047	9.5727	9.89772	8.19064	8.50992	0.00178431
1417732_at	Anxa8	6.10694	6.43056	9.19789	9.5059	7.81032	8.47459	0.00196719
1419599_s_at	Ms4a6d	5.35204	5.32423	8.17414	8.64406	6.87362	8.40335	0.00204399
1418990_at	Ms4a4d	5.57986	5.78465	8.82588	8.66549	7.21397	8.35961	0.00178431
1417625_s_at	Cxcr7	3.62805	4.34235	7.37972	6.70662	5.51418	8.32801	0.00493208
1450783_at	Ifit1	7.91899	7.66278	10.8094	10.8751	9.31657	8.28998	0.00178431
1450788_at	Saa1	5.29663	4.54676	8.27327	7.6715	6.44704	8.2861	0.00476556
1435040_at	Irak3	4.00066	4.44956	7.25686	7.28176	5.74721	8.2489	0.00197339
1418675_at	Osmr	4.6441	5.15927	7.78106	8.06412	6.41214	8.11676	0.0025832
1424354_at	Tmem140	6.15643	6.33979	9.09332	9.43889	7.75711	8.1004	0.00189593
1416625_at	Serping1	7.23022	7.18252	10.4193	10.0212	8.7133	8.07718	0.00191006
1438133_a_at	Cyr61	4.89479	4.76982	7.52946	8.12165	6.32893	7.96266	0.00273807
1421228_at	Ccl7	4.51831	4.58205	7.40761	7.67775	6.04643	7.95849	0.00178431
1451596_a_at	Sphk1	5.82589	4.71613	8.33439	8.13182	6.75206	7.79253	0.00685882
1428776_at	Slc10a6	5.08674	5.13253	8.16606	7.97321	6.58963	7.78123	0.00178431
1424339_at	Oasl1	6.47288	6.22355	9.45078	9.16131	7.82713	7.76954	0.00191006
1448471_a_at	Ctla2a	6.78129	6.73509	9.93269	9.49045	8.23488	7.74561	0.00206953
1438855_x_at	Tnfaip2	6.12291	5.90631	8.83775	9.09355	7.49013	7.73307	0.00178431
1455899_x_at	Socs3	7.08859	7.84687	10.2944	10.5403	8.94254	7.72543	0.00385788
1448061_at	Msr1	4.96101	5.04472	7.48855	8.39158	6.47147	7.65925	0.00470308
1427994_at	Cd300lf	5.99726	5.654	8.59519	8.92925	7.29392	7.65601	0.0022502
1456212_x_at	Socs3	5.84258	6.60017	9.04292	9.24668	7.68309	7.58645	0.0038216
1417460_at	Ifitm2	8.11073	7.71473	11.0237	10.6429	9.37302	7.57145	0.00256735
1424932_at	Egfr	4.85515	4.97927	7.65533	8.00289	6.37316	7.52607	0.00191006
1419666_x_at	Nupr1	5.71173	6.25968	8.96591	8.81745	7.4387	7.49525	0.00269427
1416221_at	Fstl1	6.6674	6.49269	9.34992	9.61296	8.03074	7.47149	0.00178431
1434203_at	BC055107	4.2293	4.43775	6.85579	7.55895	5.77045	7.33017	0.00365838
1452521_a_at	Plaur	5.41506	5.33203	8.41364	8.06449	6.80631	7.28798	0.00191006
1451798_at	Il1rn	5.52005	5.71759	8.25532	8.70453	7.04937	7.26574	0.00239693
1427381_at	Irg1	4.64184	4.34813	7.57961	7.12358	5.92329	7.24311	0.0026136
1417601_at	Rgs1	7.40268	6.36377	9.49274	9.97963	8.3097	7.2248	0.00774826
1417009_at	C1r	5.42584	5.89994	8.49636	8.53174	7.08847	7.2158	0.00238376
1457035_at	AI607873	3.8942	4.49764	6.84084	7.25156	5.62106	7.21139	0.00365838
1420558_at	Selp	5.44591	5.32946	8.37154	8.09787	6.81119	7.19512	0.00178431
1433837_at	8430408G22Rik	6.64448	6.32644	9.32089	9.34169	7.90837	7.1892	0.00184489
1449591_at	Casp4	6.49614	6.25926	9.20231	9.2279	7.7964	7.14732	0.00178431
1449227_at	Ch25h	5.10744	4.85499	7.86849	7.76384	6.39869	7.13519	0.00178431
1451006_at	Xdh	6.60476	7.2147	9.84786	9.63503	8.32559	7.1192	0.00318037
1437636_at	LOC623121	7.92268	7.75245	10.596	10.7402	9.25283	7.11332	0.00178431
1446887_at	n.a.*	4.28633	4.02428	7.34607	6.61572	5.5681	7.08906	0.00405883
1456340_at	2610205E22Rik	6.09567	6.35702	9.22181	8.86825	7.63569	7.05518	0.0022502
1418595_at	S3-12	6.45457	6.92619	9.84992	9.16794	8.09965	7.05454	0.00448966
1456341_a_at	Klf9	8.55913	8.21699	11.3658	11.0402	9.79553	7.03686	0.00239441
1416612_at	Cyp1b1	6.05209	6.17632	8.99028	8.86421	7.52073	7.02763	0.00178431
1420330_at	Clec4e	3.77098	3.89925	6.50324	6.78878	5.24056	7.01721	0.00184489
1425829_a_at	Steap4	5.61132	5.62198	8.4634	8.36183	7.01463	6.94495	0.00178431
1450484_a_at	Tyki	5.68511	5.78163	8.43984	8.61422	7.1302	6.93386	0.00178431
1444405_at	E030037K03Rik	4.93324	4.59739	7.44538	7.66542	6.16036	6.9167	0.0021045
1448919_at	Cd302	5.92083	5.9292	8.74077	8.68721	7.3195	6.91139	0.00178431
1452418_at	1200016E24Rik	9.38649	9.72032	12.3508	12.3319	10.9474	6.90637	0.00191006
1449773_s_at	Gadd45b	6.99759	7.10009	9.82017	9.83976	8.4394	6.87389	0.00178431
1448735_at	Cp	4.01121	4.0875	6.88674	6.77208	5.43938	6.86877	0.00178431
1431591_s_at	Isg15	7.57961	7.0397	10.177	9.97042	8.69169	6.79308	0.00302068
1425225_at	Fcgr4	4.51697	4.1769	7.18931	6.99287	5.71901	6.69997	0.00211343
1420364_at	Gpr87	5.2729	5.05194	7.50112	8.2763	6.52556	6.61753	0.00458498
1449254_at	Spp1	4.36828	4.41013	6.08768	8.14329	5.75234	6.61749	0.0328456
1417500_a_at	Tgm2	6.38715	6.70821	9.18703	9.35495	7.90933	6.60388	0.00204399
1450350_a_at	Jundm2	5.58576	5.49532	7.95924	8.48917	6.88237	6.42488	0.00298856
1423944_at	Hpx	4.45911	3.99497	7.48591	6.32105	5.56526	6.39277	0.0109239
1448756_at	S100a9	6.75543	7.01492	9.86087	9.23384	8.21626	6.3299	0.0037457
1419598_at	Ms4a6d	4.32393	4.6194	6.64601	7.61423	5.8009	6.31357	0.00709134
1417244_a_at	Irf7	7.71368	7.86829	10.4406	10.4502	9.11819	6.2959	0.00178431
1453851_a_at	Gadd45g	5.76865	5.92865	8.54494	8.44438	7.17166	6.25932	0.00178431
1417936_at	Ccl9	6.74095	6.46681	8.96911	9.53002	7.92672	6.25793	0.00348701
1453181_x_at	Plscr1	5.53152	5.63401	7.94546	8.49301	6.901	6.2181	0.00307208
1433836_a_at	8430408G22Rik	8.32417	7.82514	11.1471	10.2741	9.39263	6.21582	0.00712512
1448793_a_at	Sdc4	6.11019	6.07375	8.61759	8.81955	7.40527	6.17569	0.00178431
1439163_at	Zbtb16	5.22587	5.9006	8.30954	8.04771	6.87093	6.12789	0.00427418
1416094_at	Adam9	6.94883	7.07723	9.34992	9.90582	8.32045	6.12555	0.00318037
1460582_x_at	n.a.*	4.89628	4.99666	8.12227	6.99129	6.25163	6.10635	0.00939617
1429556_at	2610024B07Rik	6.03211	6.16877	8.83266	8.58824	7.40545	6.10507	0.00193057
1419532_at	Il1r2	6.0418	5.46629	8.33041	8.38936	7.05696	6.08747	0.00326309
1424051_at	Col4a2	6.05766	6.08081	8.48447	8.86207	7.37125	6.07984	0.00227656
1419394_s_at	S100a8	7.9442	6.87069	10.5408	9.47597	8.70791	6.06676	0.0179715
1430295_at	Gna13	7.11342	6.57126	9.16247	9.69687	8.136	6.00986	0.0046491
1449009_at	Tgtp	9.80211	9.904	12.3871	12.4925	11.1464	6.00749	0.00178431
1445238_at	Ccl21b	4.31235	4.46814	6.92824	7.02545	5.68355	6.00681	0.00178431
1416077_at	Adm	6.43714	6.27444	8.63372	9.24547	7.64769	5.99518	0.00365838
1417130_s_at	Angptl4	6.31596	6.47134	9.21939	8.72681	7.68338	5.97712	0.00302068
1421855_at	Fgl2	5.931	6.43093	8.43395	9.07204	7.46698	5.94645	0.00520093
1421578_at	Ccl4	6.27255	6.00983	8.64859	8.77753	7.42713	5.94581	0.00197339
1423754_at	Ifitm3	10.3419	9.87992	12.6921	12.673	11.3967	5.9447	0.00271792
1452426_x_at	n.a.*	8.87307	8.79355	11.276	11.5135	10.114	5.90293	0.00191006
1455274_at	n.a.*	4.94259	4.46277	7.72864	6.79818	5.98304	5.90008	0.00834356
1435749_at	Gda	6.33729	6.45441	9.03628	8.86276	7.67269	5.87126	0.00184489
1418131_at	Samhd1	8.0111	7.93597	10.6959	10.3572	9.25004	5.86861	0.00225019
1451777_at	BC013672	5.89108	5.75028	8.38894	8.33636	7.09167	5.82383	0.00178431
1442025_a_at	AI467657	4.33486	4.42976	6.92993	6.88067	5.6438	5.74773	0.00178431
1418932_at	Nfil3	4.34013	4.47051	6.9269	6.91302	5.66264	5.71455	0.00178431
1452349_x_at	Ifi205	8.95213	9.00573	11.5205	11.4568	10.2338	5.69504	0.00178431
1447643_x_at	Snai2	7.31706	7.19166	9.33607	10.1907	8.50887	5.69235	0.00593275
1448830_at	Dusp1	8.72711	8.67698	11.1321	11.2446	9.9452	5.60345	0.00178431
1428288_at	2310051E17Rik	8.05408	8.08031	10.5167	10.5884	9.30986	5.59967	0.00178431
1451371_at	Mrap	5.25891	5.94622	8.28942	7.88578	6.84508	5.59849	0.00538079
1449835_at	Pdcd1	5.95119	6.15204	8.67242	8.39147	7.29178	5.58025	0.00237836
1421279_at	Lamc2	6.67934	6.7076	8.85056	9.49391	7.93285	5.57419	0.00405883
1458252_at	n.a.*	4.21336	4.13773	6.63362	6.67321	5.41448	5.57074	0.00178431
1420697_at	Slc15a3	5.50017	5.40663	7.93315	7.92376	6.69093	5.55988	0.00178431
1425964_x_at	Hspb1	6.93875	7.49822	9.90824	9.47523	8.45511	5.55294	0.00458521
1422943_a_at	Hspb1	7.72345	8.07827	10.5038	10.2292	9.13368	5.52369	0.00287624
1425582_a_at	Emcn	4.71616	4.81774	7.23605	7.22257	5.99813	5.51116	0.00178431
1417507_at	Cyb561	5.10724	5.05697	7.35071	7.73359	6.31213	5.50233	0.00254348
1425503_at	Gcnt2	4.32983	4.12256	6.68614	6.6816	5.45503	5.49332	0.00191006
1419208_at	Map3k8	5.78382	5.9292	8.24444	8.37031	7.08194	5.46744	0.00191006
1438868_at	D14Ertd668e	6.98308	7.3455	9.87727	9.35064	8.38912	5.4629	0.00412651
1418175_at	Vdr	5.23838	5.20873	7.68066	7.66497	6.44819	5.46136	0.00178431
1424814_a_at	Bcl2l14	6.32999	6.09223	8.51224	8.80759	7.43551	5.45965	0.00252742
1418580_at	Rtp4	8.58516	8.58195	10.9353	11.1289	9.80784	5.45872	0.00191006
1445422_at	LOC621549	3.65618	3.92252	6.65366	5.80586	5.00955	5.42795	0.00680964
1450330_at	Il10	4.14492	4.1556	6.40127	6.77662	5.3696	5.42148	0.00252742
1457117_at	Nfe2l2	5.57963	4.98681	7.43496	8.00595	6.50184	5.41602	0.00587469
1427095_at	Cdcp1	7.12475	7.2147	9.30159	9.90601	8.38676	5.40418	0.00391532
1416514_a_at	Fscn1	9.07512	8.93077	11.2406	11.633	10.2199	5.40323	0.00276839
1428562_at	LOC100042498	7.51404	7.36921	9.59871	10.1517	8.65842	5.40233	0.00365838
1419874_x_at	Zbtb16	4.21586	4.29235	6.82407	6.54765	5.46998	5.39549	0.00217795
1428289_at	Klf9	7.85296	7.81595	10.3974	10.1349	9.0503	5.39528	0.0021045
1458268_s_at	Igfbp3	5.65573	6.01561	8.36836	8.16516	7.05121	5.39302	0.00273807
1418572_x_at	Tnfrsf12a	5.95488	6.00496	8.39413	8.42223	7.19405	5.38243	0.00178431
1418901_at	Cebpb	6.49269	6.77844	9.5369	8.5898	7.84946	5.38066	0.0084589
1435394_s_at	Rhoc	6.96335	7.11675	9.43001	9.48566	8.24894	5.34349	0.00191006
1451978_at	Loxl1	4.58329	4.75047	7.31379	6.85019	5.87444	5.33363	0.00317887
1427284_a_at	Ttpa	3.99664	4.19936	6.55632	6.4641	5.30411	5.3229	0.00197339
1447044_at	n.a.*	4.87511	4.46636	7.35129	6.80891	5.87541	5.3124	0.00458498
1418176_at	Vdr	5.08331	5.1023	7.14829	7.85502	6.29723	5.31052	0.00477662
1455930_at	n.a.*	5.58095	6.16915	8.31149	8.24854	7.07753	5.29622	0.0038216
1416371_at	Apod	7.3579	8.20194	10.119	10.2503	8.98229	5.29544	0.00651209
1419738_a_at	Tpm2	7.99946	7.31515	10.0842	10.0194	8.85454	5.25787	0.00467673
1431808_a_at	Itih4	4.11594	3.94247	6.81298	6.02994	5.22533	5.24978	0.00586499
1416576_at	Socs3	6.60798	6.7523	9.13839	8.9904	7.87227	5.22073	0.00197339
1426015_s_at	Asph	5.32768	5.69031	8.01831	7.76424	6.70013	5.21361	0.00302068
1448239_at	Hmox1	5.92626	5.80569	7.93687	8.55412	7.05574	5.20363	0.00427411
1416011_x_at	Ehd1	6.56883	6.45009	8.68866	9.08699	7.69864	5.19946	0.00287624
1434279_at	n.a.*	7.73667	7.00867	10.0108	9.4748	8.55773	5.16984	0.00747779
1418133_at	Bcl3	5.52628	5.77199	8.15268	7.882	6.83324	5.163	0.0025832
1451612_at	Mt1	5.63626	5.41375	8.18447	7.60121	6.70892	5.16166	0.00427411
1450971_at	Gadd45b	6.88437	6.77568	9.40091	8.98974	8.01267	5.1526	0.00298856
1419309_at	Pdpn	6.71057	6.60423	9.06187	8.98121	7.83947	5.14847	0.00191006
1448949_at	Car4	3.77461	4.26562	6.34312	6.41711	5.20012	5.1337	0.00335138
1449037_at	Crem	6.12272	6.28991	8.50525	8.62712	7.38625	5.13324	0.00203714
1448259_at	Fstl1	6.57809	6.60062	8.67484	9.22212	7.76892	5.13059	0.00365838
1424254_at	Ifitm1	6.73326	6.62514	9.0348	9.03277	7.85649	5.11448	0.00189593
1418571_at	Tnfrsf12a	6.39555	6.22658	8.49044	8.8284	7.48524	5.09243	0.00271792
1438251_x_at	Htra1	8.08222	7.68994	9.99723	10.4454	9.05369	5.04626	0.00415195
1449297_at	Casp12	5.03986	5.16265	7.6043	7.26246	6.26732	5.03548	0.00267772
1451537_at	Chi3l1	4.76839	4.56388	7.27991	6.70128	5.82837	5.00878	0.00434109
1416303_at	Litaf	7.66586	7.63368	9.84092	10.102	8.81061	4.99916	0.00226523
1429527_a_at	Plscr1	4.67431	4.63834	6.37607	7.57406	5.81569	4.98897	0.0141981
1450291_s_at	Ms4a4c	5.08899	5.10244	7.45017	7.37858	6.25505	4.98869	0.00189593
1433741_at	Cd38	7.06191	7.17478	9.22461	9.64902	8.27758	4.98803	0.00307208
1451204_at	Scara5	5.02387	5.67201	7.5404	7.77505	6.50283	4.95807	0.00507765
1455009_at	Cpd	6.28449	6.66126	8.72556	8.83882	7.62753	4.95649	0.00292504
1424759_at	Arrdc4	5.12741	5.38302	7.29268	7.83472	6.40946	4.95363	0.00427411
1438097_at	Rab20	4.26516	4.58467	6.55124	6.91503	5.57902	4.9527	0.00339101
1429570_at	Mlkl	4.30973	4.08393	6.65524	6.34931	5.34955	4.9432	0.00287624
1421074_at	Cyp7b1	5.3901	4.69636	7.43307	7.26233	6.19546	4.93987	0.00536855
1460330_at	Anxa3	6.54866	6.71549	8.65458	9.2051	7.78096	4.91696	0.00408397
1439831_at	n.a.*	6.0918	6.10672	8.53405	8.25418	7.24669	4.90704	0.00239441
1449106_at	Gpx3	8.19902	9.08596	11.2563	10.6145	9.78896	4.90054	0.0119533
1425028_a_at	Tpm2	6.76905	6.03842	8.60932	8.78149	7.54957	4.89624	0.00580243
1437689_x_at	Clu	8.10845	7.8712	10.374	10.1814	9.13375	4.88328	0.00249527
1447285_at	n.a.*	4.47484	4.10562	6.81897	6.32874	5.43204	4.869	0.00448779
1416318_at	Serpinb1a	7.91844	7.69017	9.80148	10.3659	8.94399	4.8547	0.00445591
1435529_at	OTTMUSG00000016644	6.29892	6.08326	8.29133	8.62602	7.32488	4.81515	0.00302068
1418293_at	Ifit2	8.19036	8.10858	10.4399	10.3897	9.28214	4.80763	0.00194162
1438676_at	Mpa2l	8.05278	8.0918	10.2938	10.3797	9.20452	4.80474	0.00194162
1448610_a_at	Sod2	8.86493	9.03045	11.3549	11.0608	10.0778	4.7905	0.00269843
1429947_a_at	Zbp1	7.4228	7.1546	9.60003	9.49107	8.41713	4.77947	0.00248843
1425470_at	n.a.*	5.19973	5.36475	7.88731	7.18586	6.40941	4.77119	0.00563281
1448931_at	F2rl1	6.22725	6.12917	7.84159	9.01343	7.30286	4.75452	0.0147402
1424608_a_at	Bzw2	7.47773	7.37991	10.2179	9.13779	8.55332	4.75355	0.0123626
1432826_a_at	Cd80	4.41469	4.4214	6.45684	6.87556	5.54212	4.75076	0.0031194
1447640_s_at	Pbx3	4.09911	4.59563	6.57613	6.61162	5.47062	4.74531	0.00365838
1446661_at	n.a.*	4.35644	4.16357	7.17038	5.84181	5.38305	4.74394	0.0198614
1419604_at	Zbp1	7.06359	6.97242	9.29521	9.22564	8.13921	4.7319	0.00197339
1420804_s_at	Clec4d	3.99777	4.21278	6.4357	6.24656	5.2232	4.71043	0.00250974
1460302_at	Thbs1	4.38268	4.87923	6.65353	7.07654	5.74799	4.70463	0.00502545
1436032_at	n.a.*	6.0889	6.06605	8.34354	8.27572	7.19355	4.69837	0.00196719
1430130_at	Vwce	4.58294	4.66383	7.20006	6.50076	5.73689	4.68167	0.00558531
1420965_a_at	Enc1	7.00157	7.36746	9.33196	9.49006	8.29776	4.67997	0.00307208
1442556_at	n.a.*	4.01695	3.89825	5.84646	6.51764	5.06983	4.67332	0.00537492
1416832_at	Slc39a8	5.18141	4.91622	7.58579	6.94577	6.1573	4.64915	0.00553832
1426276_at	Ifih1	7.80461	7.50397	9.8258	9.91608	8.76262	4.64814	0.00267772
1449368_at	Dcn	9.96158	10.2846	12.5293	12.1489	11.2311	4.64614	0.00369757
1433768_at	Palld	7.09503	7.15522	9.19301	9.48217	8.23136	4.63466	0.0025832
1440925_at	n.a.*	5.06892	5.39167	7.45339	7.40692	6.33022	4.59434	0.00279001
1419816_s_at	Errfi1	6.8748	7.26851	9.09993	9.44274	8.17149	4.59377	0.00397288
1423954_at	C3	9.39287	9.57204	11.626	11.7346	10.5814	4.5879	0.00230247
1458525_at	n.a.*	5.48737	5.71948	7.81124	7.78415	6.70056	4.57659	0.00239441
1439191_at	n.a.*	4.56667	4.84485	6.68402	7.10091	5.79911	4.55265	0.0038216
1454849_x_at	Clu	8.78929	8.62845	10.9073	10.8792	9.80106	4.54532	0.0021797
1433908_a_at	Cttn	8.14112	7.82664	9.98971	10.3404	9.07446	4.5352	0.00365838
1435137_s_at	1200015M12Rik	11.2956	10.9122	13.3014	13.2637	12.1932	4.52723	0.00308058
1426774_at	Parp12	7.51238	7.54012	9.63024	9.77692	8.61491	4.52315	0.00213214
1423466_at	Ccr7	8.28002	7.76617	10.1986	10.1977	9.11064	4.51616	0.00399409
1458496_at	n.a.*	4.08223	4.13773	6.83745	5.72317	5.19514	4.50125	0.0143441
1421408_at	Igsf6	4.14649	4.42505	6.19402	6.71331	5.36972	4.49368	0.00467226
1436763_a_at	Klf9	4.53779	4.69583	6.88949	6.6798	5.70073	4.49349	0.00254348
1421694_a_at	Vcan	4.20031	4.12538	6.5476	6.11352	5.2467	4.49311	0.00349384
1423555_a_at	Ifi44	6.91718	6.69364	9.07466	8.86353	7.88725	4.48058	0.00276839
1418626_a_at	Clu	7.39003	7.44874	9.62878	9.53384	8.50035	4.47512	0.0021045
1439496_at	Ston1	6.76053	6.81429	8.94737	8.94737	7.86739	4.46901	0.00204399
1423722_at	Tmem49	8.94895	8.66695	10.8589	11.0758	9.88764	4.46725	0.00302068
1443698_at	Fbxo39	8.14144	7.49578	10.0333	9.92196	8.89813	4.46615	0.00538273
1449326_x_at	Saa2	4.69991	4.3606	7.06473	6.31342	5.60967	4.46548	0.00788228
1460259_s_at	Clca1	5.88146	5.94301	7.49777	8.63991	6.99054	4.45865	0.0154102
1430352_at	Adamts9	5.82412	5.96477	7.98258	8.11703	6.97212	4.45479	0.00235617
1434372_at	AW112010	9.33888	9.22152	11.451	11.4157	10.3568	4.44797	0.00211343
1434070_at	Jag1	6.12416	6.36855	8.16465	8.62991	7.32182	4.44112	0.00419274
1418612_at	Slfn1	7.3715	7.21134	9.36885	9.51318	8.36622	4.43704	0.0023983
1421854_at	Fgl2	5.74547	5.88537	7.59992	8.32898	6.88993	4.43529	0.00661506
1424609_a_at	BC003993	10.3931	10.5827	12.711	12.5606	11.5618	4.43175	0.00250074
1451355_at	Asah3l	5.22785	6.04022	7.38401	8.17583	6.70698	4.42563	0.0153327
1453008_at	2300002D11Rik	4.8393	5.00897	7.12074	7.01712	5.99653	4.42229	0.00238376
1418149_at	Chga	4.62136	4.88098	6.32837	7.46275	5.82337	4.42105	0.0162096
1423017_a_at	Il1rn	5.80693	5.60999	8.0427	7.66289	6.78063	4.42089	0.00347341
1437458_x_at	Clu	8.23284	8.1119	10.363	10.2665	9.24356	4.41486	0.0022502
1425471_x_at	n.a.*	6.2164	6.09902	8.46763	8.10806	7.22278	4.37758	0.00317887
1427228_at	Palld	6.96524	7.08783	9.0003	9.30672	8.09002	4.36802	0.00300075
1451342_at	Spon1	5.77876	5.69089	7.81742	7.90524	6.79808	4.36657	0.00218481
1421473_at	Il1a	4.26921	4.62536	6.15911	6.98088	5.50864	4.35511	0.00962342
1448175_at	Ehd1	6.01787	5.94601	8.00894	8.19498	7.04195	4.34699	0.0023983
1436778_at	Cybb	7.47022	7.60156	9.47885	9.83137	8.5955	4.34459	0.00318037
1424638_at	Cdkn1a	6.9726	6.77309	8.99385	8.98378	7.93083	4.33482	0.00239885
1444064_at	Samhd1	5.95488	6.06464	8.32997	7.91494	7.06611	4.32498	0.00359294
1437595_at	E030010A14Rik	5.13467	5.15907	7.20533	7.31329	6.20309	4.32422	0.00218481
1453429_at	9530057J20Rik	4.67602	4.83391	7.33975	6.39438	5.81102	4.3232	0.0111541
1416749_at	Htra1	7.59896	7.4859	9.29356	10.0053	8.59593	4.30793	0.00658944
1417160_s_at	Expi	9.36553	7.74993	10.9266	10.4022	9.61106	4.30693	0.0398167
1417109_at	Tinagl	6.41889	6.46442	8.39106	8.68477	7.48979	4.276	0.00287624
1418825_at	Irgm	7.92942	7.99552	10.1743	9.93593	9.00878	4.26524	0.0026136
1454862_at	Phldb2	3.99139	4.5771	6.28069	6.46703	5.32905	4.25633	0.00530281
1435748_at	Gda	6.47966	6.98273	8.78589	8.84887	7.77429	4.24624	0.00427418
1459876_at	n.a.*	4.70143	4.73177	6.90555	6.69688	5.75891	4.24162	0.00250974
1436530_at	OTTMUSG00000000971	7.80991	7.14161	9.5957	9.52494	8.51804	4.24146	0.00593275
1448562_at	Upp1	5.02775	5.18637	7.18372	7.19637	6.14855	4.23683	0.00238376
1418340_at	Fcer1g	7.47332	7.16852	9.37616	9.43089	8.36222	4.23571	0.00300075
1418357_at	Foxg1	4.77555	5.21243	6.6496	7.50014	6.03443	4.23067	0.011512
1456226_x_at	Ddr1	7.51861	7.35395	9.5293	9.49617	8.47451	4.2177	0.00239693
1427226_at	Epn2	4.79859	5.08108	6.93656	7.08996	5.97655	4.20885	0.00302068
1448123_s_at	Tgfbi	7.7285	7.66603	9.49237	10.049	8.73397	4.2088	0.00476477
1421057_at	Dnase1l3	5.5583	5.46999	7.4245	7.74604	6.54971	4.20214	0.00307208
1418937_at	Dio2	5.5693	5.7116	7.40462	8.01563	6.67529	4.19792	0.00555604
1453196_a_at	Oasl2	8.04379	7.86394	10.1228	9.92214	8.98816	4.19477	0.002844
1433488_x_at	Gns	8.5698	8.78713	10.5449	10.9462	9.71199	4.19028	0.00386583
1427035_at	Slc39a14	6.67212	6.81736	8.90718	8.71041	7.77677	4.1816	0.00269427
1432273_a_at	Darc	6.05382	6.3324	8.49851	8.01563	7.22509	4.18133	0.00477213
1417925_at	Ccl22	7.615	7.44947	9.44848	9.7362	8.56229	4.17016	0.00307978
1435640_x_at	A130040M12Rik	6.58396	6.43902	8.5818	8.55743	7.54055	4.16444	0.00239441
1460084_at	n.a.*	4.92599	4.80102	7.63853	6.20199	5.89188	4.16049	0.0289275
1439189_at	D630023B12Rik	5.37653	4.88459	7.1118	7.2606	6.15838	4.15729	0.00446393
1446860_at	n.a.*	4.24911	4.4263	6.73645	6.0438	5.36392	4.14802	0.00693397
1428547_at	Nt5e	4.85086	5.13103	6.74257	7.33998	6.01611	4.14201	0.00598181
1419764_at	Chi3l3	4.82168	5.57981	7.42394	7.0714	6.22421	4.13225	0.00919032
1426910_at	Pawr	6.50155	6.56637	8.43254	8.72648	7.55674	4.1283	0.00302068
1448276_at	Tspan4	6.03288	5.88339	8.19495	7.80887	6.98002	4.12324	0.00365838
1419549_at	Arg1	4.12447	4.00512	6.03506	6.18203	5.08667	4.12317	0.00252646
1424607_a_at	BC003993	10.4227	10.6841	12.6814	12.5104	11.5746	4.11957	0.0030422
1440481_at	Stat1	7.53953	7.78017	9.43288	9.96928	8.68047	4.11597	0.00527598
1436507_at	Irak2	6.15661	5.7284	7.9577	8.00972	6.96311	4.11589	0.0037457
1434458_at	Fst	4.05905	4.13465	5.98701	6.28834	5.11726	4.11482	0.0030422
1419315_at	Slamf9	5.59243	5.57145	7.33626	7.9034	6.60089	4.10644	0.00507219
1434369_a_at	Cryab	4.64275	4.52741	6.96621	6.27537	5.60294	4.10025	0.00685386
1449065_at	Acot1	4.96608	5.46444	6.93503	7.56282	6.23209	4.09443	0.00868391
1420664_s_at	Procr	5.47346	5.1925	7.36782	7.36439	6.34954	4.0929	0.00298856
1424769_s_at	Cald1	7.44942	7.22679	9.2258	9.5143	8.35408	4.08955	0.00338933
1427537_at	Eppk1	6.8131	7.1492	8.65388	9.36367	7.99497	4.07733	0.00840715
1452474_a_at	Art3	5.8933	6.32958	8.20477	8.07037	7.12451	4.07311	0.00405883
1418892_at	Rhoj	5.67494	5.63873	8.08002	7.28459	6.66957	4.07124	0.00867693
1450315_at	V1rd14	4.10065	3.92624	6.01719	6.06008	5.02604	4.07046	0.00252742
1451426_at	Dhx58	6.28541	6.03707	8.18829	8.17553	7.17158	4.05772	0.00287624
1449455_at	Hck	6.6006	6.70038	8.63156	8.70196	7.65862	4.04537	0.00239693
1426348_at	Col4a1	6.9557	7.24124	9.04986	9.15999	8.1017	4.01793	0.00307978
1429184_at	Gvin1	7.69126	8.15969	10.0248	9.8282	8.92598	4.00283	0.00459851
1448383_at	Mmp14	7.37336	7.35077	9.54934	9.16145	8.35873	3.98154	0.00365838
1434025_at	n.a.*	4.80336	4.86657	6.783	6.86962	5.83064	3.97607	0.00239885
1453102_at	Flrt3	4.20962	4.4335	5.911	6.7033	5.31436	3.96025	0.00965376
1451340_at	Arid5a	6.85365	6.80916	8.87949	8.73246	7.81869	3.93012	0.00256081
1431055_a_at	Snx10	7.6011	7.38969	9.33558	9.60315	8.48238	3.92847	0.00339101
1448550_at	Lbp	5.25387	5.67182	7.615	7.2527	6.44835	3.9204	0.00526486
1441506_at	Dcn	3.91822	4.32533	6.38866	5.79428	5.10662	3.91684	0.00775099
1417962_s_at	Ghr	6.81544	6.80393	8.91635	8.64122	7.79424	3.91524	0.0030422
1421075_s_at	Cyp7b1	5.24798	4.95372	7.08862	7.04753	6.08447	3.91015	0.00315
1456250_x_at	Tgfbi	7.59462	7.50612	9.14376	9.88823	8.53318	3.90582	0.00835633
1419463_at	Clca2	6.01433	5.83096	7.2786	8.4924	6.90407	3.89832	0.0227265
1438878_at	6430537K16Rik	5.43586	5.68929	7.5043	7.5456	6.54376	3.89703	0.00302068
1427932_s_at	1200003I10Rik	11.5149	11.1761	13.324	13.2918	12.3267	3.89699	0.00341888
1437635_at	Dcbld2	5.44576	5.41799	7.17015	7.61222	6.41153	3.88876	0.00423062
1448898_at	Ccl9	4.9922	4.73229	6.63362	7.00865	5.84169	3.88763	0.00434109
1428737_s_at	Gramd3	7.00671	7.14299	8.99114	9.07335	8.05355	3.88359	0.0025832
1427512_a_at	Lama3	6.65925	6.92471	8.22959	9.26642	7.76999	3.87991	0.0170578
1418350_at	Hbegf	4.62266	4.58725	6.22853	6.88922	5.58191	3.87426	0.00686798
1451564_at	Parp14	7.92653	8.18651	9.98512	10.0311	9.03231	3.86795	0.0030422
1419004_s_at	Bcl2a1a	9.16583	8.79466	10.8182	11.0434	9.95551	3.86518	0.00418067
1416271_at	Perp	8.42388	8.53517	10.1938	10.6627	9.4539	3.86038	0.00458521
1450622_at	Bcar1	4.82009	4.73767	6.60849	6.84226	5.75213	3.85438	0.00302068
1449858_at	Cd86	6.6637	6.52334	8.24919	8.82611	7.56558	3.84804	0.0058544
1417013_at	Hspb8	6.60629	6.6977	8.63116	8.5523	7.62186	3.83635	0.00254348
1417185_at	Ly6a	9.83259	9.91594	11.9271	11.7005	10.844	3.83583	0.00302068
1425536_at	Stx3	6.41743	6.54823	8.16029	8.68397	7.45248	3.8352	0.00527598
1426004_a_at	Tgm2	5.00733	5.11572	6.85903	7.13784	6.02998	3.82885	0.00322876
1441855_x_at	Cxcl1	7.32289	7.25909	9.62735	8.8244	8.25843	3.82348	0.00990188
1424296_at	Gclc	8.70027	8.58578	10.2326	10.9214	9.61	3.82099	0.00768846
1448990_a_at	Myo1b	4.74325	5.06058	6.695	6.96234	5.86529	3.80198	0.00411023
1416432_at	Pfkfb3	7.18536	7.40313	9.10976	9.3291	8.25684	3.79785	0.00335306
1423596_at	Nek6	5.55414	5.52207	7.30866	7.61327	6.49954	3.79174	0.00335138
1426074_at	n.a.*	5.26092	5.23397	7.44871	6.89027	6.20847	3.7896	0.0055648
1416572_at	Mmp14	5.59973	5.71092	7.61172	7.53966	6.61551	3.78518	0.00259709
1448694_at	Jun	6.0062	6.30086	7.96626	8.17886	7.11305	3.78169	0.00368986
1419413_at	Ccl17	6.12823	6.07302	8.23606	7.80086	7.05954	3.77856	0.00435393
1437161_x_at	Rbpms	5.44348	5.46961	7.72894	7.01725	6.41482	3.77519	0.00811165
1456633_at	Trpm3	4.08393	4.30165	6.44804	5.76873	5.15059	3.77269	0.0081515
1459557_at	n.a.*	4.20585	4.03528	6.39742	5.67018	5.07718	3.76652	0.00887487
1451021_a_at	Klf5	4.06565	4.05355	5.69898	6.24488	5.01577	3.76417	0.00547978
1439255_s_at	Gpr137b	6.86468	7.00039	8.37738	9.30505	7.88687	3.75466	0.0137692
1433532_a_at	Mbp	3.89038	4.22356	5.92803	5.99875	5.01018	3.74878	0.00362412
1428319_at	Pdlim7	5.31771	5.245	7.20006	7.17032	6.23327	3.74205	0.00254348
1418025_at	Bhlhb2	6.71983	6.67655	8.47818	8.72465	7.6498	3.74049	0.00307208
1435477_s_at	Fcgr2b	7.11675	7.50772	9.46779	8.95431	8.26164	3.72906	0.00702349
1418295_s_at	Dgat1	7.51741	7.86829	9.65381	9.52897	8.64212	3.72837	0.0038216
1449027_at	Rhou	5.25888	5.58012	7.26481	7.37026	6.36852	3.72705	0.00363944
1451644_a_at	H2-Q6	7.28113	7.6396	9.47868	9.23597	8.40885	3.72427	0.00436562
1416239_at	Ass1	7.30287	6.98745	9.20295	8.87734	8.09265	3.71916	0.00458498
1451860_a_at	Trim30	7.83549	8.03777	9.81534	9.8418	8.8826	3.71133	0.00300006
1460220_a_at	Csf1	6.01628	5.90035	7.94871	7.74846	6.90345	3.70703	0.0030422
1415949_at	Cpe	5.80385	6.17912	7.7809	7.96972	6.9334	3.69052	0.00434109
1434881_s_at	Kctd12	7.46863	7.78962	9.18125	9.84359	8.57077	3.68916	0.00898376
1449134_s_at	Spic	4.69632	4.3286	5.98584	6.80138	5.45304	3.68368	0.0130236
1449363_at	Atf3	5.33097	5.22144	6.96887	7.34396	6.21631	3.68127	0.00408397
1420498_a_at	Dab2	5.62902	6.20286	7.65023	7.93709	6.8548	3.67495	0.00713179
1423505_at	Tagln	7.54618	7.04504	9.08595	9.25781	8.23374	3.67125	0.00549741
1437463_x_at	Tgfbi	6.62407	6.4414	8.16392	8.65084	7.47006	3.66711	0.00537492
1455959_s_at	Gclc	8.356	8.26897	9.58072	10.788	9.24843	3.66013	0.0248587
1422601_at	Serpinb9	7.88815	8.04835	9.69005	9.98665	8.9033	3.65559	0.00368418
1417876_at	Fcgr1	5.77333	6.25172	7.43219	8.3323	6.94739	3.65463	0.0172535
1423917_a_at	Cttn	7.80861	7.68239	9.37538	9.85312	8.67988	3.65216	0.00515093
1423028_at	Ifna2	4.25047	4.45695	6.2162	6.22643	5.28751	3.64926	0.00302068
1448380_at	Lgals3bp	8.45333	8.40511	10.2748	10.3172	9.36262	3.64719	0.0025832
1448005_at	Sash1	7.0575	7.27189	9.05614	9.00579	8.09783	3.64588	0.00305604
1417793_at	Iigp2	6.69426	7.30639	8.85197	8.87849	7.93278	3.64244	0.00681418
1417193_at	Sod2	8.81676	9.13539	10.9224	10.7541	9.90717	3.63558	0.00386583
1429310_at	Flrt3	4.11006	4.27706	5.99442	6.11383	5.12384	3.6315	0.00302068
1421679_a_at	Cdkn1a	6.9948	6.31891	9.06265	7.96988	7.58656	3.6286	0.0287309
1424050_s_at	Fgfr1	4.45755	4.66763	6.54437	6.29839	5.49199	3.62704	0.00365838
1434314_s_at	Rab11fip5	6.56332	6.6825	8.14596	8.81316	7.55123	3.62165	0.00806933
1417409_at	Jun	5.89248	6.64808	8.07204	8.18156	7.19854	3.62134	0.00993657
1447691_x_at	n.a.*	5.10168	5.25239	7.37972	6.67655	6.10258	3.60775	0.00899223
1425177_at	Shmt1	7.71724	7.39659	9.60706	9.2068	8.48192	3.60503	0.00542754
1451501_a_at	Ghr	5.97069	5.8079	7.85872	7.61908	6.8141	3.60403	0.00348701
1435999_at	Spink8	4.2725	4.31553	5.73027	6.55659	5.21872	3.60354	0.0116216
1421307_at	Car13	4.28257	4.58725	6.24492	6.32137	5.35903	3.6006	0.00365538
1421812_at	Tapbp	9.73474	9.95555	11.6698	11.7138	10.7685	3.59666	0.0031194
1423323_at	Tacstd2	5.02378	4.97766	6.30799	7.38496	5.9236	3.59441	0.0200941
1435579_at	n.a.*	5.64247	6.4273	7.79178	7.95654	6.95452	3.57831	0.0111092
1422562_at	Rrad	6.23012	6.72075	8.51091	8.11837	7.39504	3.57812	0.00727404
1447891_at	n.a.*	4.66103	4.08893	6.86692	5.55597	5.29321	3.57134	0.0378008
1428909_at	A130040M12Rik	10.7824	10.6604	12.5519	12.5522	11.6367	3.55693	0.00287624
1435436_at	n.a.*	7.40346	8.20437	9.75746	9.51153	8.7192	3.5568	0.0122201
1419714_at	Cd274	7.85965	7.91561	9.73771	9.6971	8.80252	3.5548	0.00271792
1418507_s_at	Socs2	5.98458	6.18255	7.95442	7.87079	6.99809	3.553	0.00311991
1435701_at	n.a.*	5.19047	5.46347	7.11675	7.18774	6.23961	3.54374	0.00353129
1441843_s_at	5230400M03Rik	6.11162	6.66481	8.14838	8.27515	7.29999	3.53952	0.00639191
1419123_a_at	Pdgfc	5.33459	5.47992	7.08109	7.37666	6.31807	3.53479	0.00378219
1449399_a_at	Il1b	5.36928	5.47818	7.31067	7.1782	6.33408	3.53254	0.00302068
1455186_a_at	1190003J15Rik	6.42747	6.44336	8.15166	8.35973	7.34555	3.53149	0.0031194
1417853_at	Clca1	3.95858	4.25042	5.73862	6.10053	5.01204	3.51879	0.00510451
1433781_a_at	Cldn12	4.63424	5.0682	6.53346	6.79895	5.75871	3.51857	0.00558531
1416041_at	Sgk1	7.82373	7.9162	9.57767	9.79053	8.77703	3.51648	0.00323804
1417520_at	Nfe2l3	6.68112	6.51722	8.08784	8.73399	7.50504	3.51067	0.00834356
1432548_at	Parp14	5.63655	5.57919	7.35698	7.47512	6.51196	3.50201	0.00298856
1423725_at	Pls3	6.65522	7.08257	8.38279	8.96354	7.77103	3.49253	0.00959376
1434380_at	Gbp6	9.02987	9.14306	10.8507	10.9295	9.9883	3.49106	0.00300006
1448107_x_at	Klk1	5.39718	4.46039	6.11153	7.34902	5.82953	3.48581	0.0476042
1423150_at	Scg5	4.48568	3.92219	5.81243	6.19383	5.10353	3.48026	0.00878753
1427164_at	Il13ra1	5.10879	5.13349	6.98193	6.85618	6.0201	3.47718	0.00298856
1422474_at	Pde4b	7.84032	7.75447	9.44037	9.74886	8.696	3.4755	0.0038216
1436990_s_at	Ndg2	7.47324	8.80527	10.3108	9.56007	9.03735	3.47299	0.0463535
1457952_at	n.a.*	6.53958	6.18021	8.29263	8.01473	7.25679	3.46724	0.00510451
1418018_at	Cpd	5.70397	5.62423	7.68678	7.22679	6.56044	3.46459	0.00527238
1433147_at	Cald1	4.28246	4.1385	5.72889	6.27112	5.10524	3.45702	0.00656697
1421717_at	V1rd4	4.87719	4.68706	6.71923	6.42044	5.67598	3.45266	0.00418972
1425918_at	Egln3	5.65207	5.38234	7.35642	7.25263	6.41087	3.45172	0.00365838
1421375_a_at	S100a6	7.72255	6.37374	9.18787	8.48121	7.94134	3.44952	0.0465286
1457725_at	EG666926	5.60186	5.33339	7.34279	7.16228	6.36008	3.44597	0.00391532
1431214_at	LOC100041156	6.77827	6.69795	8.23387	8.81174	7.63046	3.44545	0.0070018
1424749_at	Wdfy1	4.65781	4.6617	6.57412	6.31345	5.55177	3.44386	0.00356166
1420621_a_at	App	7.81013	7.71781	9.65262	9.44086	8.65535	3.44086	0.00337945
1428736_at	Gramd3	8.84731	9.05132	10.6261	10.8331	9.83946	3.43496	0.00368932
1455385_at	Exoc6	7.44921	7.08628	9.01536	9.07951	8.15759	3.43353	0.00434109
1437868_at	BC023892	6.09925	6.4485	8.02712	8.07873	7.1634	3.432	0.0042264
1435628_x_at	BC005512	7.42095	7.28543	9.50743	8.75594	8.24244	3.43068	0.0110167
1441912_x_at	C2	6.42661	6.27106	8.30824	7.93784	7.23594	3.4205	0.00463554
1447448_s_at	Klf6	6.92824	6.86423	8.57852	8.75651	7.78188	3.41355	0.00318037
1417483_at	Nfkbiz	7.11554	7.88065	9.10928	9.42847	8.38349	3.41239	0.0130469
1448950_at	Il1r1	6.77103	6.90436	8.64925	8.56717	7.72295	3.41176	0.00307208
1415837_at	Klk1	5.21623	4.46527	6.05247	7.16618	5.72504	3.40718	0.0360798
1425233_at	2210407C18Rik	6.59306	6.20853	8.17938	8.13971	7.28017	3.38406	0.00458498
1426875_s_at	Srxn1	6.32806	6.3336	7.75687	8.42224	7.21019	3.38398	0.00892833
1428538_s_at	Rarres2	5.90216	5.98194	8.15903	7.24154	6.82117	3.38284	0.0163164
1455271_at	LOC620695	5.07835	5.49557	7.01749	7.07208	6.16587	3.38187	0.00490411
1418191_at	Usp18	8.21163	8.18754	9.89838	10.0125	9.07751	3.37725	0.00302068
1416431_at	Tubb6	6.85097	6.52478	8.51702	8.36978	7.56564	3.37649	0.00435393
1454783_at	Il13ra1	5.45201	5.72722	7.22172	7.46442	6.46634	3.37165	0.00445591
1417961_a_at	Trim30	9.11774	9.43525	10.8792	11.1792	10.1529	3.36994	0.00516062
1453238_s_at	3930401B19Rik	11.1103	11.1015	12.9155	12.7918	11.9798	3.35834	0.0030422
1439221_s_at	Cd40	6.70053	6.49221	8.19513	8.49301	7.47022	3.35822	0.00445591
1448872_at	Reg3g	7.48816	7.05532	8.97309	9.06488	8.14536	3.35718	0.00526486
1418021_at	C4b	6.37973	6.44108	8.49619	7.81516	7.28304	3.35258	0.00949156
1426081_a_at	Dio2	4.24813	4.34324	6.00002	6.08125	5.16816	3.35184	0.00305467
1424067_at	Icam1	8.08767	8.20247	9.71165	10.0665	9.01707	3.34961	0.00458453
1417654_at	Sdc4	7.4207	7.03434	9.02317	8.91364	8.09796	3.3424	0.00477384
1423619_at	Rasd1	5.06518	5.72464	7.25272	7.01668	6.26481	3.33987	0.0100171
1425156_at	Gbp6	8.59332	8.22247	10.5883	9.70381	9.27697	3.33607	0.0182737
1439388_s_at	Bcar1	6.17356	6.08215	7.88605	7.84568	6.99686	3.33573	0.00302068
1442947_x_at	n.a.*	4.94528	4.70933	6.94335	6.18143	5.69485	3.329	0.0127369
1418981_at	Casp12	5.88856	5.92107	7.72119	7.55857	6.77235	3.32894	0.00318671
1448325_at	Myd116	7.01519	7.04057	8.71616	8.80648	7.8946	3.3252	0.00302068
1438660_at	Gcnt2	5.26267	5.42477	7.22411	6.92962	6.21029	3.32452	0.00427418
1416551_at	Atp2a2	7.29699	7.98978	10.042	8.70916	8.50948	3.32231	0.0486638
1416592_at	Glrx	7.08209	6.89228	8.55727	8.87594	7.8519	3.31595	0.00458498
1416051_at	C2	5.55719	5.52776	7.31897	7.22326	6.4068	3.31415	0.0030422
1449028_at	Rhou	5.66156	5.44085	7.50736	7.04977	6.41488	3.31121	0.00616671
1453939_x_at	LOC677168	5.73815	5.67248	7.87624	6.9793	6.56654	3.29997	0.016416
1450061_at	Enc1	7.21719	7.58361	9.11336	9.13203	8.26155	3.29961	0.00458498
1417162_at	Tmbim1	5.8456	6.00644	7.88939	7.40468	6.78653	3.29668	0.00630077
1418815_at	Cdh2	3.97686	4.46235	5.77505	6.10553	5.07995	3.29592	0.00772191
1427855_at	n.a.*	4.61444	4.6549	6.59796	6.11195	5.49481	3.29501	0.00591196
1459513_at	n.a.*	4.29396	4.14122	6.56895	5.30369	5.07695	3.29146	0.0343782
1447939_a_at	EG545605	6.28985	6.28383	8.23499	7.77117	7.14496	3.2858	0.00565075
1437451_at	1110006O17Rik	5.19801	5.11843	6.79475	6.94764	6.01471	3.27836	0.00331587
1426812_a_at	9130404D14Rik	6.64722	6.87939	8.25606	8.68318	7.61646	3.26326	0.00597757
1416012_at	Ehd1	5.30058	5.33567	7.09636	6.95232	6.17123	3.26303	0.00322876
1420671_x_at	Ms4a4c	6.74251	6.79591	8.54563	8.40451	7.62214	3.26223	0.00322876
1419132_at	Tlr2	5.83768	5.79173	7.52474	7.51588	6.66751	3.26166	0.00302068
1452452_at	n.a.*	6.59689	6.10847	8.20274	7.90968	7.20444	3.25697	0.0075489
1455089_at	Gng12	7.08788	7.12453	8.54608	9.07185	7.95758	3.25524	0.00680964
1435226_at	Rnf19b	7.129	7.05844	8.69039	8.89848	7.94408	3.25063	0.0036221
1416897_at	Parp9	8.79048	9.05965	10.6148	10.6358	9.77519	3.24959	0.00386583
1418879_at	9030611O19Rik	5.38027	5.23867	6.71644	7.29946	6.15871	3.24559	0.00825634
1442074_at	n.a.*	6.16244	6.09863	8.21864	7.43915	6.97971	3.24532	0.0129744
1435820_x_at	Ddr1	6.53379	6.68379	8.31966	8.28997	7.4568	3.24007	0.00329011
1420150_at	Spsb1	6.6139	6.80496	8.39978	8.40739	7.5565	3.23587	0.00348203
1425469_a_at	n.a.*	8.31768	8.21329	10.1637	9.75555	9.11255	3.23583	0.00530281
1425619_s_at	Dsg2	6.1099	6.00808	7.46201	8.04395	6.90599	3.2355	0.0080826
1432478_a_at	Rnf19b	6.34787	6.36246	7.88005	8.21731	7.20192	3.23445	0.00448879
1418349_at	Hbegf	4.5881	4.80222	6.34963	6.4273	5.54181	3.23396	0.00365838
1416273_at	Tnfaip2	6.24049	6.38915	7.96457	8.04925	7.16086	3.23125	0.00339101
1451458_at	Tmem2	5.64969	5.71998	7.42145	7.32612	6.52931	3.22421	0.00318037
1416613_at	Cyp1b1	4.43077	4.32513	6.44975	5.68293	5.22215	3.22297	0.0128935
1424775_at	Oas1a	7.84448	7.72057	9.53411	9.40539	8.62614	3.22036	0.00343468
1429089_s_at	2900026A02Rik	6.49611	6.45646	8.08702	8.23905	7.31966	3.2193	0.00335306
1448261_at	Cdh1	7.69724	7.52988	8.97411	9.62475	8.45649	3.21735	0.010089
1424733_at	P2ry14	5.90286	6.12338	7.49864	7.89734	6.85555	3.21511	0.00577835
1438928_x_at	Ninj1	8.53932	8.49503	10.1196	10.283	9.35924	3.21348	0.00340341
1415935_at	Smoc2	4.76958	4.83719	6.39855	6.57058	5.64397	3.2069	0.00350395
1453470_a_at	Gna13	6.70237	6.58075	8.11062	8.53056	7.48108	3.20212	0.00558264
1449901_a_at	Map3k6	4.22506	4.34106	6.38721	5.53402	5.12184	3.19885	0.0160932
1426994_at	Phlpp	6.4399	6.56715	8.04207	8.31687	7.3415	3.19529	0.00427418
1417852_x_at	Clca1	5.31815	5.35129	6.65082	7.35948	6.16994	3.18309	0.0112522
1450958_at	Tm4sf1	6.64158	7.23163	8.66469	8.5487	7.77165	3.18234	0.00861288
1435631_x_at	Exoc6	7.20575	7.00761	8.76951	8.78117	7.94101	3.17919	0.00362412
1419684_at	Ccl8	6.57385	6.09212	7.91218	8.08888	7.16676	3.17673	0.00688721
1415871_at	Tgfbi	7.21955	7.30551	8.68548	9.17253	8.09576	3.17438	0.00654857
1449109_at	Socs2	6.79339	6.49269	8.54715	8.06899	7.47555	3.1712	0.00787822
1456635_at	LOC100039742	7.4245	7.4245	9.38604	8.78671	8.25543	3.16428	0.00867801
1448748_at	Plek	6.7816	6.83711	8.32017	8.62068	7.63989	3.16252	0.00435393
1422473_at	Pde4b	7.5106	7.4058	9.01414	9.22062	8.28779	3.15836	0.00376474
1424041_s_at	C1s	6.39862	6.67299	8.1703	8.21373	7.36391	3.15188	0.00416836
1458297_s_at	Marco	4.09501	4.32934	5.43434	6.30127	5.03999	3.1506	0.0180664
1420361_at	Slc11a1	6.048	6.27701	7.75013	7.88611	6.99031	3.15057	0.00408397
1460351_at	S100a11	10.1914	9.36957	11.4091	11.463	10.6083	3.15049	0.0152491
1418847_at	Arg2	5.19225	4.81427	6.04655	7.26923	5.83058	3.14841	0.0382578
1448148_at	Grn	8.20864	8.13705	9.73053	9.92184	8.99952	3.14561	0.00365838
1439790_at	Serpinb9	5.05979	5.31911	6.7695	6.91395	6.01559	3.14329	0.00434109
1415897_a_at	Mgst1	8.89314	9.68414	11.0543	10.8274	10.1148	3.14323	0.0153046
1448377_at	Slpi	6.45721	6.18928	8.01651	7.93098	7.14849	3.13943	0.00423383
1437992_x_at	Gja1	7.56091	8.22452	9.61614	9.46841	8.7175	3.13738	0.0108009
1451683_x_at	H2-D1	8.99564	9.50019	10.7588	11.0337	10.0721	3.13475	0.00831717
1435665_at	AI451617	7.0501	6.99426	8.8443	8.49591	7.84614	3.13382	0.00479807
1433508_at	Klf6	6.76845	7.3402	8.47613	8.92641	7.8778	3.13169	0.0122492
1456792_at	Tbc1d2	4.76394	4.40527	6.54461	5.91538	5.4073	3.12834	0.0121724
1426471_at	Zfp52	7.00632	7.49976	8.50056	9.29497	8.0754	3.12687	0.0199668
1437176_at	AI451557	7.88088	8.12539	9.555	9.74057	8.82546	3.12672	0.00446393
1427348_at	Zc3h12a	5.62583	5.7491	7.49015	7.17373	6.5097	3.12634	0.00470502
1421088_at	Gpc4	5.64247	5.71894	7.11493	7.53338	6.50243	3.12413	0.00566648
1421752_a_at	Serpinb5	6.10667	5.68219	7.28488	7.78984	6.7159	3.12299	0.01041
1455688_at	Ddr2	4.61063	4.91673	6.28407	6.52758	5.58475	3.12131	0.00530015
1417785_at	Pla1a	5.54135	5.64491	7.07881	7.39011	6.4138	3.11953	0.00463047
1452914_at	2410024N18Rik	6.8231	6.52931	8.0943	8.53056	7.49432	3.10851	0.00739104
1433992_at	Shroom2	5.05052	5.16265	6.37923	7.10629	5.92467	3.1084	0.01269
1446167_at	n.a.*	4.66285	4.82132	6.35838	6.3949	5.55936	3.10491	0.00359294
1433546_at	Gns	8.16277	8.46037	9.66601	10.2246	9.12843	3.10313	0.00986197
1416200_at	Il33	5.21888	5.25743	6.97113	6.77192	6.05484	3.10238	0.00370789
1425884_at	Bxdc1	5.68142	5.79339	7.26297	7.47254	6.55258	3.09588	0.00398795
1422629_s_at	Shroom3	5.0031	4.53704	6.37192	6.42803	5.58502	3.09492	0.00646757
1419762_at	Ubd	10.1096	9.54789	11.2623	11.6549	10.6437	3.09481	0.0112522
1438050_x_at	EG668383	7.64926	7.12213	9.22638	8.80469	8.20061	3.09478	0.011009
1448681_at	Il15ra	6.59281	6.98095	8.39994	8.43169	7.60135	3.09285	0.0053705
1435084_at	C730049O14Rik	8.43434	8.6922	10.0155	10.3689	9.37774	3.09284	0.00591196
1457664_x_at	C2	5.90915	5.56529	7.48197	7.24885	6.55132	3.09124	0.00565075
1438841_s_at	Arg2	4.31235	4.07197	5.26827	6.37192	5.00613	3.0907	0.030271
1416016_at	Tap1	8.60284	8.51097	10.2411	10.1203	9.3688	3.08182	0.0035869
1427041_at	BC013712	6.44054	6.63936	8.15353	8.16721	7.35016	3.07465	0.0037457
1416156_at	Vcl	7.37289	7.1545	8.58357	9.17891	8.07247	3.06853	0.0101487
1432517_a_at	Nnmt	5.4624	5.62452	7.59971	6.71745	6.35102	3.06338	0.0191609
1449110_at	Rhob	7.92456	7.47041	9.33885	9.28564	8.50487	3.06261	0.00642061
1423865_at	Slc44a1	5.40101	5.35038	6.64771	7.33165	6.18269	3.06096	0.0115906
1424768_at	Cald1	6.03191	5.6503	7.47359	7.42973	6.64638	3.05369	0.0054088
1422620_s_at	Ppap2a	5.91797	6.08121	7.41206	7.80791	6.80479	3.05335	0.00592527
1427318_s_at	Fer1l3	6.20179	6.24525	7.53782	8.11992	7.0262	3.04271	0.0090495
1449740_s_at	Dsg2	7.86621	7.66377	9.08015	9.65873	8.56721	3.04081	0.00979831
1433891_at	Lgr4	6.78543	7.22494	8.31694	8.89946	7.80669	3.03778	0.0132051
1454809_at	Ncoa7	8.25308	8.31605	9.66851	10.091	9.08216	3.02134	0.006004
1450744_at	Ell2	5.82907	6.05656	7.32539	7.74518	6.73905	3.01566	0.00699364
1431008_at	H2-Q6	9.46412	9.95277	11.2219	11.3775	10.5041	3.01318	0.00768846
1447510_at	C530014P21Rik	4.6959	4.77993	6.421	6.23739	5.53356	3.01316	0.00391532
1427442_a_at	App	8.95985	9.24685	10.6778	10.7109	9.89884	3.01254	0.00458498
1423760_at	Cd44	8.31214	8.23501	9.58249	10.1458	9.06885	3.01165	0.00890594
1455854_a_at	Ssh1	6.82387	7.08836	8.56704	8.52274	7.7505	3.00793	0.0044366
1455399_at	Cnksr1	4.26854	4.26818	5.61039	6.10361	5.06268	3.00766	0.00729845
1428143_a_at	Pnpla2	7.2848	8.2911	9.65959	9.08884	8.58108	3.00271	0.0340238
1416454_s_at	Acta2	8.63765	7.94406	9.95637	9.79428	9.08309	2.99898	0.0130236
1418094_s_at	Car4	4.54001	4.49894	6.28707	5.91929	5.31133	2.99739	0.00542537
1428346_at	Trafd1	8.20178	8.15235	9.87479	9.64632	8.96881	2.99693	0.00420044
1448618_at	Mvp	6.04305	5.88188	7.44947	7.64234	6.75418	2.99683	0.00434109
1419829_a_at	Gab2	6.1417	6.42954	7.57559	8.16074	7.07689	2.99498	0.0111611
1451941_a_at	Fcgr2b	6.69265	6.99197	8.62144	8.22796	7.6335	2.99465	0.00737962
1456228_x_at	Mbp	4.11743	4.36326	5.6395	6.00002	5.03005	2.98849	0.00640846
1415899_at	Junb	6.02779	6.4398	7.83688	7.78471	7.02229	2.98349	0.00598181
1423100_at	Fos	6.80338	7.52387	8.35755	9.12369	7.95212	2.98348	0.0281884
1427355_at	Calca	4.6995	4.65774	6.43565	6.07537	5.46706	2.98326	0.00538079
1444929_at	n.a.*	4.46565	4.08393	6.23571	5.46634	5.06291	2.9819	0.0186625
1417400_at	Rai14	6.38486	6.5023	7.72269	8.3151	7.23124	2.98001	0.0100171
1449195_s_at	Cxcl16	7.08257	7.06664	8.51532	8.78447	7.86225	2.97996	0.00450249
1456494_a_at	Trim30	7.08918	7.26723	8.70696	8.7926	7.96399	2.97229	0.00401011
1429347_at	Bcl2l14	4.70405	4.77993	6.21371	6.41186	5.52739	2.97068	0.00411815
1417262_at	Ptgs2	6.15863	6.20526	7.87369	7.63056	6.96704	2.96942	0.00435393
1435292_at	Tbc1d4	7.69694	8.05513	9.15421	9.73772	8.661	2.96891	0.0124085
1426951_at	Crim1	5.66144	6.21652	7.1633	7.85317	6.72361	2.96751	0.020144
1422514_at	Aebp1	5.84695	5.47426	7.51752	6.94016	6.44472	2.96542	0.0125023
1436779_at	Cybb	5.9527	6.19557	7.49775	7.78569	6.85792	2.96408	0.00561169
1438629_x_at	Grn	9.77802	10.0249	11.2796	11.6522	10.6837	2.95768	0.00677068
1439527_at	Pgr	5.3636	5.77812	7.04072	7.2297	6.35303	2.95744	0.00690791
1424034_at	Rora	6.4418	6.77647	8.07277	8.27398	7.39126	2.95721	0.00581993
1436576_at	A630077B13Rik	6.05877	6.09871	7.67122	7.61372	6.8606	2.95617	0.00356728
1439259_x_at	Abhd4	8.23777	8.36899	9.71907	10.015	9.0852	2.956	0.00507765
1448575_at	Il7r	8.64219	8.95142	10.1678	10.5472	9.57716	2.94999	0.00756319
1428731_at	Usp54	5.34519	5.64773	6.84364	7.25535	6.27298	2.93434	0.00809205
1443104_at	n.a.*	5.24471	5.6692	6.74538	7.27427	6.23339	2.93401	0.0125257
1416563_at	Ctps	8.81025	8.21616	10.0413	10.0865	9.28856	2.92962	0.0101914
1416589_at	Sparc	7.99263	7.97627	9.51167	9.55855	8.75978	2.92951	0.0035869
1452009_at	1810054D07Rik	5.57638	5.72157	7.25631	7.14223	6.42413	2.92876	0.00405321
1434283_at	LOC100044968	7.08611	7.30184	8.57726	8.90958	7.9687	2.92705	0.00594325
1418203_at	Pmaip1	6.22037	6.09498	7.61643	7.79722	6.93225	2.92644	0.00427418
1425065_at	Oas2	6.93511	6.73936	8.53736	8.23331	7.61128	2.92432	0.00558046
1422320_x_at	Phxr5	6.73209	6.85543	8.46123	8.21965	7.5671	2.92144	0.00465162
1439256_x_at	Gpr137b-ps	7.11521	7.08741	8.14181	9.15358	7.8745	2.92084	0.0274199
1426911_at	Dsc2	5.85474	5.96567	7.20143	7.70285	6.68117	2.91186	0.00834056
1418718_at	Cxcl16	7.92669	7.8524	9.50813	9.35282	8.66001	2.90981	0.00401011
1435888_at	Egfr	5.98648	5.91591	7.24719	7.73498	6.72114	2.90772	0.00787822
1444254_at	Tns4	4.12587	4.57103	5.64346	6.12863	5.11725	2.90311	0.0122059
1437902_s_at	Rarres2	6.24754	6.1156	8.02766	7.40744	6.94956	2.89985	0.011481
1433935_at	AU020206	9.51904	9.54571	11.0232	11.1105	10.2996	2.89685	0.00368418
1449335_at	Timp3	6.69704	6.72887	8.18805	8.30519	7.47979	2.89521	0.0037457
1455320_at	AI480535	6.87876	6.7027	8.35164	8.2971	7.55755	2.89515	0.00413337
1450322_s_at	Slfn3	4.66117	4.30278	6.25842	5.76873	5.24777	2.89106	0.0107702
1421223_a_at	Anxa4	7.99836	7.89731	9.23013	9.72794	8.71343	2.89026	0.00834356
1433742_at	Ankrd15	4.75168	5.22587	6.23571	6.80123	5.75362	2.88725	0.0151508
1439476_at	Dsg2	8.22377	8.20376	9.39714	10.0862	8.97772	2.8837	0.0135022
1436545_at	Dtx4	7.02846	7.00346	8.49826	8.58891	7.77977	2.88311	0.00369674
1451655_at	Slfn8	7.92927	7.81857	9.50027	9.30273	8.63771	2.88301	0.00444959
1433915_s_at	Epn2	5.38848	5.74998	7.16035	7.03226	6.33277	2.88201	0.00595384
1456676_a_at	Pfkfb3	5.00524	5.26235	6.92245	6.39562	5.89641	2.87835	0.0103651
1418069_at	Apoc2	5.38617	5.21951	6.8477	6.80781	6.0653	2.87769	0.00408397
1450637_a_at	Aebp1	5.32783	5.3017	7.09896	6.58025	6.07718	2.87755	0.00868391
1458469_at	Cblb	7.59903	7.75309	9.12047	9.28022	8.4382	2.87645	0.00443142
1435354_at	Kcnj15	6.67876	6.99606	8.08329	8.63977	7.59947	2.87611	0.0118895
1446052_at	n.a.*	5.63832	5.56379	7.52699	6.72093	6.36251	2.87369	0.0181813
1418456_a_at	Cxcl14	4.61895	4.55222	6.30759	5.9062	5.34624	2.87053	0.00648221
1439060_s_at	Wipi1	6.23205	6.18988	7.55205	7.90954	6.97088	2.86758	0.00576472
1418773_at	Fads3	5.1984	4.97123	6.98475	6.22156	5.84398	2.86461	0.0177631
1425663_at	Il1rn	4.69991	4.51471	6.08603	6.16511	5.36644	2.86445	0.00433536
1434447_at	Met	4.72844	4.8111	6.134	6.44081	5.52859	2.86321	0.00530281
1455104_at	Mxd1	6.11682	6.00433	7.52608	7.63005	6.81932	2.86294	0.00404096
1434180_at	Fermt2	6.2936	6.56357	7.89056	7.99995	7.18692	2.86131	0.00505686
1455019_x_at	Ckap4	6.94883	6.72848	8.23906	8.47002	7.5966	2.85975	0.00534173
1438830_at	ENSMUSG00000073459	4.14406	4.38962	6.13152	5.42932	5.02363	2.85518	0.0158129
1434181_at	Fermt2	5.60254	5.80683	7.06218	7.37419	6.46143	2.85503	0.00593275
1460255_at	Tnfsf13b	4.87304	4.81901	6.28611	6.4316	5.60244	2.8537	0.00405883
1439141_at	Gpr18	7.12009	7.33868	8.79557	8.68838	7.98568	2.85322	0.00462414
1460550_at	Mtmr11	4.58725	4.9273	6.10622	6.43212	5.51322	2.85184	0.00776146
1459974_x_at	Tbc1d9b	6.45744	6.39686	8.3451	7.53075	7.18254	2.84964	0.0188589
1418355_at	Nucb2	6.03281	6.00373	7.39813	7.65455	6.7723	2.8443	0.0047472
1417394_at	Klf4	6.10942	6.36697	7.75983	7.73024	6.99162	2.84186	0.00476212
1452304_a_at	Arhgef5	6.13602	6.43065	7.4203	8.1575	7.03612	2.83934	0.0180478
1440342_at	G530011O06Rik	5.07048	5.35129	6.84599	6.58415	5.96298	2.83663	0.00622656
1420272_at	n.a.*	7.42685	7.05299	8.86894	8.61869	7.99187	2.83607	0.00739644
1421365_at	Fst	5.01239	4.88632	6.71905	6.18717	5.70123	2.8358	0.00962342
1450691_at	Caskin2	5.95494	6.34852	7.615	7.69597	6.90361	2.83579	0.00657558
1416225_at	Adh1	5.82362	6.58846	7.81513	7.60037	6.95689	2.83178	0.018172
1450857_a_at	Col1a2	7.24593	6.42256	8.39122	8.27863	7.58458	2.82977	0.0199065
1452348_s_at	Mnda	8.29365	8.80307	10.0611	10.0362	9.29851	2.82901	0.00882299
1429049_at	Nuak2	5.69433	5.50567	7.11041	7.08879	6.3498	2.82765	0.00434109
1456567_x_at	Grn	9.00589	9.06619	10.3926	10.676	9.78519	2.82507	0.00517078
1455165_at	n.a.*	5.75377	5.97257	7.31281	7.40888	6.61201	2.82388	0.00467226
1449277_at	Ccl19	7.85721	7.21416	9.20696	8.85544	8.28344	2.81965	0.015854
1438027_at	n.a.*	7.8838	8.03002	9.40114	9.50232	8.70432	2.8183	0.00430141
1441779_at	9530006C21Rik	5.83833	6.47537	7.35891	7.94395	6.90414	2.81782	0.021713
1455082_at	Cblb	7.38629	7.36534	8.86695	8.86546	8.12101	2.80966	0.00372965
1424595_at	F11r	7.86934	7.96158	9.12957	9.67956	8.66001	2.80715	0.0101914
1448290_at	Pap	4.24663	4.69768	5.70938	6.21251	5.21655	2.80653	0.0138424
1426236_a_at	Glul	9.70518	9.73078	11.5229	10.8899	10.4622	2.80588	0.0124255
1437342_x_at	Pttg1ip	8.79315	8.63161	10.1128	10.2879	9.45636	2.80491	0.00470517
1458192_at	C130065N10Rik	4.94477	4.89461	6.44677	6.36356	5.66243	2.80009	0.00391922
1455158_at	Itga3	6.2118	6.52435	7.93201	7.77505	7.1108	2.80006	0.00588531
1450170_x_at	H2-D1	5.77942	5.53711	7.03889	7.24803	6.40086	2.79955	0.00556128
1447886_at	0610040B09Rik	5.0315	5.15747	7.13666	6.02062	5.83656	2.79753	0.0377017
1416257_at	Capn2	7.70218	7.7425	9.02493	9.38548	8.46377	2.79502	0.00605265
1456857_at	1500011B03Rik	6.06612	5.71601	7.22736	7.51489	6.63109	2.78961	0.00781031
1435872_at	n.a.*	8.28136	8.94046	9.80235	10.3796	9.35093	2.78957	0.0227453
1460283_at	Mefv	5.22089	5.59487	6.76305	7.00764	6.14661	2.7846	0.00772191
1422619_at	Ppap2a	5.99058	6.15246	7.36469	7.73103	6.80969	2.78242	0.00686798
1455332_x_at	Fcgr2b	6.58719	6.93966	8.45244	8.0217	7.50025	2.77722	0.0104184
1448771_a_at	Fth1	11.2497	11.3353	12.6801	12.8499	12.0288	2.77493	0.00448966
1416469_at	Luzp1	6.33015	6.44745	7.48421	8.23728	7.12477	2.77395	0.0176758
1451201_s_at	Rnh1	8.58873	8.77032	10.1034	10.1986	9.41527	2.77308	0.00458498
1429235_at	Galntl2	4.60894	4.75003	6.26713	6.03448	5.41514	2.77275	0.00517825
1451415_at	1810011O10Rik	6.75184	6.78621	8.14954	8.32491	7.50312	2.76677	0.00445591
1431375_s_at	Parva	4.8676	5.05535	6.37623	6.48149	5.69517	2.76521	0.00467226
1454681_at	Rbm35a	6.19039	6.19199	7.33007	7.98701	6.92487	2.76514	0.0137265
1450881_s_at	Gpr137b	7.15636	7.10334	8.20204	8.9911	7.86321	2.76393	0.0191292
1434310_at	Bmpr2	7.52959	7.80214	8.88113	9.38311	8.39899	2.76304	0.0109239
1416808_at	Nid1	5.83275	6.07044	7.31461	7.51758	6.68384	2.75967	0.00561424
1448605_at	Rhoc	4.89747	4.64146	6.33739	6.12833	5.50116	2.75756	0.00584966
1449450_at	Ptges	5.02503	5.00616	6.65023	6.30592	5.74684	2.75581	0.00597757
1449300_at	Cttnbp2nl	4.89565	4.72366	6.02776	6.51229	5.53984	2.75178	0.00948234
1451318_a_at	Lyn	7.77772	7.67494	8.88793	9.48104	8.45541	2.74756	0.012009
1448318_at	Adfp	8.7981	9.54753	10.6619	10.5989	9.90161	2.74651	0.0176758
1458588_at	n.a.*	4.49682	4.38102	5.81391	5.9789	5.16766	2.74629	0.00462904
1438310_at	n.a.*	5.25544	5.80597	6.79338	7.18098	6.25894	2.74437	0.0145675
1416996_at	Tbc1d8	6.97621	7.2403	8.35106	8.77762	7.8363	2.74364	0.00920622
1418685_at	Tirap	4.53783	4.61109	6.27703	5.78313	5.30227	2.74275	0.0091717
1448863_a_at	Tnfaip1	7.05805	6.75153	8.14197	8.57428	7.63146	2.73839	0.010054
1421315_s_at	Cttn	5.39944	5.63708	6.74697	7.19556	6.24476	2.73778	0.00944367
1452264_at	Tenc1	4.57077	5.04963	6.17758	6.34121	5.5348	2.73055	0.00945718
1433163_at	6230414M07Rik	6.72045	6.72166	8.4698	7.87021	7.44553	2.7301	0.0121538
1434547_at	Cpd	6.28391	6.32502	7.6243	7.88085	7.02852	2.7285	0.00522474
1445229_at	Dgat1	4.96105	5.22358	6.49734	6.58017	5.81554	2.72534	0.00537354
1417149_at	P4ha2	4.3499	5.0446	5.84406	6.44166	5.42005	2.72377	0.026561
1436297_a_at	Grina	7.62764	7.87012	9.33157	9.05321	8.47064	2.71981	0.00667538
1441281_s_at	Ninj1	6.57117	6.4727	7.9466	7.98322	7.24342	2.71881	0.00423062
1427225_at	Epn2	4.67622	4.57897	6.15947	5.97994	5.34865	2.71718	0.00472429
1449191_at	Wfdc12	5.55771	5.43818	7.13627	6.74359	6.21894	2.71695	0.00739338
1430700_a_at	Pla2g7	5.78374	6.63591	7.52159	7.78194	6.93079	2.71686	0.0252043
1456586_x_at	Mvp	7.14778	6.90436	8.42901	8.50696	7.74703	2.71682	0.00522474
1422006_at	Eif2ak2	6.77435	6.47528	8.09606	8.03698	7.34567	2.71642	0.00570819
1443913_at	n.a.*	7.00208	6.67672	8.62078	7.93855	7.55953	2.71371	0.0184247
1419676_at	Mx2	5.63438	5.40804	7.00184	6.92049	6.24119	2.71312	0.00507765
1422706_at	Tmepai	6.96785	7.27828	8.51565	8.60958	7.84284	2.71237	0.00592601
1448417_at	Ninj1	6.02389	5.76873	7.46879	7.20258	6.616	2.71204	0.00673274
1420741_x_at	Lce1i	6.59339	6.98349	8.07927	8.37496	7.50778	2.71072	0.00918981
1449222_at	Ebi3	5.98824	5.7992	7.3738	7.28592	6.61179	2.70596	0.00477662
1422476_at	Ifi30	9.15558	8.97766	10.3776	10.6268	9.78441	2.7049	0.00578035
1418322_at	Crem	5.54604	5.2717	6.84567	6.84285	6.12656	2.70456	0.00542537
1427918_a_at	Rhoq	7.35515	8.04279	9.02721	9.23927	8.41611	2.70246	0.0169871
1418536_at	H2-Q5	10.0618	10.2505	11.5598	11.6199	10.873	2.7014	0.0047318
1451314_a_at	Vcam1	8.26907	8.15591	9.42017	9.86688	8.92801	2.6964	0.00867693
1457022_at	n.a.*	4.31421	4.31098	5.72822	5.75873	5.02804	2.69612	0.00408397
1422095_a_at	Tyki	5.87362	5.96647	7.47485	7.22679	6.63543	2.69592	0.00537492
1437347_at	Ednrb	5.16486	5.40592	6.63555	6.79664	6.00075	2.69579	0.00561424
1453022_at	Gpihbp1	5.84427	6.03712	7.30673	7.4357	6.65596	2.69543	0.00507765
1438945_x_at	Gja1	6.15702	6.8256	7.96961	7.8716	7.20596	2.69315	0.0153731
1455660_at	Csf2rb	7.64771	7.8481	8.8609	9.49349	8.46255	2.69314	0.0148706
1418722_at	Ngp	6.50305	7.30907	8.31775	8.35264	7.62063	2.69285	0.0212351
1438992_x_at	Atf4	7.88172	8.29415	9.46335	9.57042	8.80241	2.6925	0.00790063
1449351_s_at	Pdgfc	5.28644	5.76485	6.51557	7.39293	6.23995	2.69186	0.0324686
1421654_a_at	Lmna	5.68091	5.24443	6.98458	6.79707	6.17675	2.69102	0.00904708
1436173_at	Dlc1	4.59545	4.48512	6.09685	5.83768	5.25378	2.68884	0.00558046
1437409_s_at	Gpr126	5.01174	5.13194	6.3773	6.61919	5.78504	2.68777	0.00546514
1437304_at	Cblb	6.3096	6.67041	7.80064	8.03074	7.20285	2.68642	0.00801467
1422437_at	Col5a2	6.97157	6.86468	8.11655	8.57103	7.63096	2.68638	0.00889062
1417341_a_at	Ppp1r2	8.04524	7.80025	8.96692	9.72868	8.63527	2.68525	0.021063
1429778_at	Optn	4.22896	4.93077	5.98598	6.02334	5.29226	2.68477	0.0165487
1450829_at	Tnfaip3	7.81309	8.21357	9.44537	9.42906	8.72527	2.68308	0.0074192
1427746_x_at	LOC100044874	10.0658	10.3702	11.6106	11.6718	10.9296	2.68181	0.00590777
1446922_at	n.a.*	4.03731	4.82366	5.8981	5.80694	5.1415	2.67963	0.0207764
1451441_at	2210415F13Rik	5.23781	5.00202	6.42654	6.65499	5.83034	2.67744	0.00618717
1447711_x_at	4933412E12Rik	6.6207	6.88496	8.22866	8.11527	7.4624	2.67426	0.00569027
1450377_at	LOC640441	4.55507	4.16329	5.81996	5.73647	5.0687	2.67407	0.00751464
1423933_a_at	1600029D21Rik	4.73669	5.12107	6.21565	6.47848	5.63797	2.67249	0.0089785
1448378_at	Fscn1	7.26833	7.33307	8.64979	8.78574	8.00923	2.67042	0.00458498
1441971_at	n.a.*	6.94264	6.9312	7.85925	8.84788	7.64524	2.66963	0.0324405
1451924_a_at	Edn1	4.8771	5.24873	6.31923	6.63916	5.77106	2.66896	0.00959376
1435777_at	E030018N11Rik	7.4245	7.43287	8.79698	8.89252	8.13672	2.66857	0.00434109
1425145_at	Il1rl1	5.10399	5.38234	6.7254	6.59149	5.9508	2.66711	0.00593275
1439184_s_at	Txndc17	9.26899	9.06782	10.4783	10.6876	9.87567	2.66573	0.00576329
1435727_s_at	Lima1	7.09417	7.35191	8.45215	8.82178	7.93	2.66461	0.00868391
1424857_a_at	Trim34	8.46339	8.84804	9.81625	10.322	9.36241	2.66363	0.014216
1418758_a_at	Pscd3	6.96401	7.09705	8.25854	8.62852	7.73703	2.6629	0.00740632
1424351_at	Wfdc2	6.19239	5.59889	7.55523	7.06037	6.60172	2.66135	0.0201948
1418374_at	Fxyd3	7.61744	6.81158	8.26025	8.99178	7.92026	2.66014	0.0399603
1417147_at	B230317C12Rik	4.75753	4.66044	6.10543	6.13392	5.41433	2.65864	0.00436562
1444632_at	BC064078	4.62943	4.19974	5.55493	6.09452	5.11965	2.65763	0.0164591
1420404_at	Cd86	6.77944	6.6502	8.0952	8.15423	7.41977	2.65717	0.00458498
1427091_at	Znfx1	6.14766	6.75209	7.74241	7.97451	7.15417	2.65476	0.0148162
1422499_at	Lima1	7.34817	7.26406	8.54396	8.88512	8.01033	2.65446	0.0067997
1460416_s_at	Csprs	4.7357	4.95541	6.69446	5.81292	5.54962	2.65394	0.0277706
1424356_a_at	Metrnl	4.30799	4.51471	5.77594	5.86282	5.11537	2.65375	0.00517825
1454984_at	AW061234	9.25984	9.5815	10.6339	11.0231	10.1246	2.65341	0.0101734
1420372_at	Sntb2	6.24242	6.13819	7.63306	7.56287	6.89414	2.65306	0.00450249
1438761_a_at	Odc1	9.13712	8.62926	10.1665	10.4142	9.58677	2.65214	0.0118933
1437726_x_at	C1qb	8.93183	8.73882	10.0113	10.4729	9.5387	2.65141	0.0100608
1429399_at	Rnf125	8.28033	8.43153	9.53408	9.98976	9.05892	2.64999	0.00949235
1449851_at	Per1	6.68157	6.21808	7.89041	7.82092	7.15274	2.64972	0.00919032
1444705_at	AA589532	5.49996	5.36419	6.60058	7.06989	6.13366	2.64481	0.00980198
1427005_at	Plk2	5.58012	5.64587	6.96335	7.06766	6.31425	2.64361	0.0045359
1448416_at	Mgp	8.94536	8.93069	10.4758	10.2047	9.63912	2.64305	0.00564041
1437918_at	4930539E08Rik	6.5265	6.54289	7.68679	8.18354	7.23493	2.63988	0.0100905
1450985_a_at	Tjp2	6.51301	6.33169	7.68904	7.95638	7.12253	2.63968	0.00638837
1458589_at	n.a.*	7.83406	7.78625	9.27638	9.14354	8.51006	2.63866	0.00459851
1424186_at	Ccdc80	6.70101	6.67027	8.05956	8.11116	7.3855	2.63849	0.00434109
1423686_a_at	Prr13	8.19132	8.19264	9.42531	9.75715	8.8916	2.63764	0.00652644
1422062_at	Msr1	5.54403	5.31406	6.59429	7.05968	6.12802	2.63525	0.010731
1419300_at	Flt1	4.1953	5.15302	6.12693	6.01723	5.37312	2.63522	0.0318015
1454997_at	Msrb3	5.9198	5.61031	7.08664	7.23923	6.46399	2.63513	0.00680964
1416590_a_at	Rab34	5.60823	5.73832	7.30899	6.83293	6.37212	2.63478	0.01004
1426818_at	Arrdc4	5.52409	5.60062	6.92687	6.99212	6.26092	2.63379	0.00446393
1448655_at	Lrp1	6.01189	6.37192	7.64678	7.53083	6.89036	2.63335	0.00735377
1426942_at	Aim1	6.13265	6.62962	7.36747	8.18593	7.07892	2.63091	0.0315215
1460700_at	Stat3	8.62877	8.95252	10.0922	10.2797	9.4883	2.63046	0.00729845
1419060_at	Gzmb	6.35947	6.05427	7.83954	7.36448	6.90444	2.63015	0.0121764
1436546_at	Lix1l	5.94116	6.26119	7.43586	7.55614	6.79859	2.62957	0.00679634
1431146_a_at	Cpne8	5.16694	5.31713	6.66706	6.59932	5.93761	2.62289	0.00476497
1417133_at	Pmp22	6.4353	6.31955	7.65123	7.88552	7.0729	2.62252	0.00561992
1447863_s_at	Nr4a2	4.41981	4.64831	6.22462	5.6207	5.22836	2.61824	0.0152979
1447937_a_at	4933409K07Rik	4.88268	5.22754	6.51247	6.37192	5.74865	2.61549	0.0073555
1451985_at	Lrrk1	6.91651	7.10381	8.12746	8.66555	7.70333	2.61415	0.0125368
1420347_at	Plunc	6.30179	6.57185	7.85399	7.78961	7.12931	2.61168	0.00586481
1429321_at	Rnf149	8.89872	8.96229	10.0698	10.5604	9.62279	2.61095	0.0103025
1434366_x_at	C1qb	8.53251	8.33894	9.74658	9.89372	9.12794	2.61068	0.00551616
1437711_x_at	Odc1	8.88008	8.51629	9.86146	10.3033	9.39027	2.61023	0.0126876
1450185_a_at	Kcnj15	5.0031	4.94301	6.48622	6.22709	5.66485	2.60918	0.00574225
1425675_s_at	Ceacam1	4.95128	4.93603	6.40794	6.24514	5.6351	2.60788	0.00480811
1419607_at	Tnf	5.47457	5.30308	6.92612	6.61671	6.08012	2.60736	0.00708846
1423584_at	Igfbp7	8.53056	8.27796	9.68657	9.87821	9.09333	2.59931	0.00652644
1460134_at	9330175E14Rik	4.7326	4.89093	6.16584	6.21189	5.50032	2.59745	0.00488958
1449396_at	Aoc3	5.3114	5.829	7.24436	6.6493	6.25851	2.59661	0.0222519
1415800_at	Gja1	6.52403	7.11597	8.23199	8.16062	7.50815	2.59603	0.0137463
1421997_s_at	Itga3	6.01383	6.15743	7.44943	7.47416	6.77371	2.59577	0.00475946
1422477_at	Cables1	4.79567	5.11154	6.31297	6.34463	5.6412	2.59403	0.00657105
1421917_at	Pdgfra	5.53279	5.99237	6.9836	7.28568	6.44861	2.5884	0.0121917
1433936_at	0610010E21Rik	7.02826	6.7384	8.32279	8.18767	7.56928	2.58812	0.00665281
1439537_at	n.a.*	6.66208	7.31719	8.18005	8.54116	7.67512	2.58644	0.0205103
1434756_at	5430421B17	4.91753	5.42984	6.39773	6.68911	5.85855	2.58423	0.013655
1457676_at	Tirap	5.20014	5.40015	6.43716	6.89994	5.98435	2.58185	0.0108317
1440865_at	Ifitm6	4.60279	4.2177	6.1618	5.39096	5.09331	2.57779	0.0270726
1415941_s_at	Zfand2a	6.39552	6.2075	7.35129	7.98358	6.98447	2.57741	0.0165059
1448576_at	Il7r	7.23505	7.73183	8.64326	9.05541	8.16639	2.57736	0.0159583
1445516_at	n.a.*	4.26516	4.36752	6.08227	5.27758	4.99813	2.57323	0.0240688
1426223_at	2810439F02Rik	5.76445	5.63947	6.68007	7.44534	6.38233	2.56818	0.0221892
1419759_at	Abcb1a	4.49804	4.8111	6.00002	6.03054	5.33493	2.56812	0.00671481
1418019_at	Cpd	6.08728	6.4323	7.44035	7.79915	6.93977	2.56678	0.0108118
1447707_s_at	Pde2a	7.75585	7.94913	9.13769	9.28689	8.53239	2.5665	0.00570803
1460208_at	Fbn1	6.83698	6.62509	7.73622	8.44538	7.41092	2.56643	0.02055
1431786_s_at	1190003J15Rik	6.3635	5.75767	7.04407	7.79622	6.74037	2.56606	0.0341609
1434600_at	Tjp2	6.43138	6.25323	7.38432	8.01369	7.02065	2.56099	0.0165414
1427201_at	Mustn1	4.23694	4.40186	6.03853	5.31285	4.99754	2.56025	0.0208833
1426501_a_at	T2bp	6.54811	6.48508	7.94282	7.80274	7.19469	2.56006	0.00497034
1440920_at	n.a.*	6.00277	5.6912	7.12141	7.28343	6.52471	2.55874	0.00736316
1425113_x_at	n.a.*	8.42957	8.22202	9.73689	9.62542	9.00347	2.55861	0.00564636
1421457_a_at	Samsn1	7.10094	7.334	8.47124	8.67083	7.89425	2.55542	0.00665582
1454606_at	4933426M11Rik	8.06226	8.52238	9.47125	9.81984	8.96893	2.55483	0.0136458
1417566_at	Abhd5	5.39008	5.35556	6.69235	6.75974	6.04943	2.55482	0.00462414
1425374_at	Oas3	5.52893	5.67339	7.19638	6.70812	6.2767	2.55104	0.0113142
1437056_x_at	Crispld2	6.97449	7.02216	8.53725	8.16073	7.67366	2.5503	0.00803863
1448883_at	Lgmn	7.60839	8.13724	8.94139	9.50317	8.54755	2.54818	0.0224725
1417812_a_at	Lamb3	6.77453	6.93299	7.92089	8.48401	7.52811	2.5468	0.0140134
1421392_a_at	Birc3	9.14897	9.07995	10.4202	10.5048	9.78848	2.54566	0.00475946
1424030_at	Grhl1	4.7583	5.072	5.95025	6.57552	5.58902	2.54512	0.0188993
1423952_a_at	Krt7	7.599	7.18661	8.61799	8.86276	8.06659	2.54483	0.0105644
1424380_at	Vps37b	7.29084	7.28286	8.53868	8.7252	7.95939	2.54046	0.00530281
1435089_at	2010111I01Rik	6.64217	6.52411	7.98338	7.87215	7.25545	2.53964	0.00515093
1423484_at	Bicc1	5.11907	4.99103	6.49152	6.30656	5.72705	2.53853	0.00563812
1424968_at	2210023G05Rik	4.47348	4.59949	5.79042	5.969	5.2081	2.53717	0.00558531
1435459_at	Fmo2	4.43754	5.17422	6.08603	6.2118	5.47739	2.53684	0.0215087
1418187_at	Ramp2	5.61517	5.60919	7.00215	6.90638	6.28322	2.53518	0.00474447
1429086_at	Grhl2	5.22692	5.14811	6.51577	6.54251	5.85833	2.53437	0.00470308
1431143_x_at	Aifm2	5.28302	5.95329	7.13919	6.78036	6.28897	2.53435	0.0221627
1440179_x_at	Rnf217	5.90283	6.27093	7.12305	7.73137	6.75705	2.53209	0.0197909
1435553_at	Pdzd2	4.78585	5.10892	6.49994	6.07019	5.61622	2.52744	0.0125859
1452008_at	1810054D07Rik	5.80381	5.80947	7.14879	7.13482	6.47422	2.52304	0.00462414
1445692_x_at	n.a.*	4.96448	5.17209	6.72131	6.0854	5.73582	2.52287	0.0179037
1449184_at	Pglyrp1	5.04319	4.52812	6.48102	5.76034	5.45317	2.5228	0.0300834
1452196_a_at	Nckap1	8.62036	8.77826	9.91013	10.1575	9.36656	2.52189	0.00667307
1422997_s_at	Acot1	5.10395	5.44542	6.41501	6.80318	5.94189	2.52172	0.0119166
1431374_at	6330407A03Rik	5.37976	5.67027	6.72728	6.99099	6.19208	2.52121	0.0085748
1456545_at	Il18rap	5.62244	6.22012	7.20128	7.30703	6.58772	2.51905	0.0153206
1453210_at	5730507C01Rik	4.32464	4.8111	6.06051	5.73918	5.23385	2.51747	0.0143684
1434227_at	Krtdap	5.77733	4.97872	7.01816	6.40093	6.04378	2.51667	0.0394974
1444531_at	n.a.*	4.89546	4.94693	6.07871	6.42523	5.58658	2.51538	0.00772191
1424524_at	1200002N14Rik	7.42919	7.25254	8.72237	8.61991	8.006	2.51451	0.00558046
1417220_at	Fah	5.38499	5.86989	7.03386	6.87992	6.29216	2.51307	0.0118001
1416627_at	Spint1	6.74106	6.57242	7.60165	8.3687	7.32096	2.5113	0.0241557
1449265_at	Casp1	6.52444	6.44054	7.72914	7.89265	7.14669	2.51125	0.0054088
1460133_at	n.a.*	5.92296	6.20228	7.21207	7.56895	6.72657	2.51034	0.0102168
1425881_at	Psg28	4.56687	4.70504	5.58308	6.34291	5.29948	2.50887	0.0234643
1448263_a_at	Cndp2	8.81616	8.45684	9.85074	10.0749	9.29965	2.50758	0.00942953
1435476_a_at	Fcgr2b	7.78484	7.96359	9.30652	9.09184	8.5367	2.50527	0.00654857
1416591_at	Rab34	5.80658	6.402	7.55081	7.30665	6.76651	2.50435	0.0171362
1426808_at	Lgals3	9.72245	9.57135	10.769	11.1734	10.3091	2.50413	0.00967283
1439114_at	BC013672	5.47327	4.81401	6.89571	6.03856	5.80539	2.50272	0.0461516
1426260_a_at	Ugt1a1	5.87041	5.95798	6.82234	7.65277	6.57588	2.50248	0.0274835
1418020_s_at	Cpd	4.45581	4.64514	5.68126	6.06564	5.21196	2.50181	0.00959969
1441075_at	Nostrin	5.17613	5.22587	6.27347	6.77338	5.86221	2.50086	0.0117796
1417141_at	Igtp	9.94992	10.1062	11.3628	11.3358	10.6887	2.49879	0.00529522
1420915_at	Stat1	8.12061	8.04754	9.22193	9.58777	8.74446	2.498	0.00835432
1422705_at	Tmepai	5.90927	5.78814	7.44355	6.89498	6.50899	2.49763	0.0138606
1430221_at	9130008F23Rik	4.55799	4.37325	5.6737	5.89736	5.12557	2.4965	0.00681418
1422622_at	Nos3	4.78605	4.97728	6.41377	5.98923	5.54158	2.49638	0.0107131
1448728_a_at	Nfkbiz	6.90974	7.32303	8.48784	8.38183	7.77561	2.49398	0.00964055
1419192_at	Il4i1	7.06243	6.77642	8.33024	8.14175	7.57771	2.49073	0.00775269
1439760_x_at	Upk1b	5.8203	5.49418	7.13371	6.81244	6.31516	2.48947	0.0105644
1448749_at	Plek	6.34396	6.71944	7.54112	8.15128	7.18895	2.48716	0.0210498
1453299_a_at	Pnp	7.80901	7.79047	9.1576	9.07029	8.45684	2.48666	0.00492973
1425639_at	Centa2	6.08518	5.60062	7.62782	6.68579	6.49985	2.48614	0.0450398
1418213_at	Krt23	4.73703	4.21784	5.47003	6.11246	5.13434	2.48596	0.0274458
1447927_at	Mpa2l	9.1475	9.50302	10.5856	10.6924	9.98214	2.48588	0.00839383
1427345_a_at	Sult1a1	6.09263	6.34756	7.68348	7.38132	6.87625	2.48338	0.00899223
1452273_at	AA409316	4.87836	4.59242	5.63878	6.456	5.39139	2.48286	0.0300343
1420692_at	Il2ra	6.69729	6.34713	7.60206	8.06615	7.17816	2.48267	0.0148683
1429195_at	Apol6	5.3997	5.01414	6.7603	6.27389	5.86201	2.47972	0.0165478
1426784_at	Trim47	5.65665	5.95808	6.86528	7.36838	6.4621	2.4785	0.0151666
1438037_at	Herc5	7.76889	7.50375	9.1897	8.7016	8.29099	2.47826	0.0139297
1426324_at	H2-D1	7.89052	8.53495	9.44791	9.59523	8.86715	2.47742	0.0184585
1435870_at	n.a.*	5.87362	6.15274	7.71108	6.9312	6.66716	2.47591	0.0278424
1427364_a_at	Odc1	6.68015	6.2118	7.65191	7.85452	7.09959	2.47468	0.0123935
1451335_at	Plac8	9.58019	9.25423	10.8379	10.6107	10.0708	2.47447	0.00906785
1445539_at	Pde7b	4.93881	5.08389	6.51876	6.11722	5.66467	2.47364	0.00989457
1452367_at	Coro2a	6.10861	6.22948	7.40683	7.54431	6.82231	2.47345	0.00558046
1428891_at	9130213B05Rik	7.55035	7.65837	8.55807	9.25819	8.25624	2.46874	0.0210591
1422397_a_at	Il15ra	5.85279	5.98035	7.3058	7.13483	6.56844	2.46869	0.00587469
1452363_a_at	Atp2a2	6.84285	7.04643	8.76671	7.72966	7.59641	2.46835	0.0456857
1424921_at	Brd4	7.97974	7.49178	9.22827	8.84903	8.38721	2.46723	0.0166715
1428527_at	Snx7	5.53672	5.51782	6.49979	7.16003	6.17859	2.4668	0.0186208
1446383_at	n.a.*	4.97054	4.86961	6.10201	6.34014	5.57058	2.464	0.00652644
1438709_at	Wipi1	5.4158	4.97624	6.49269	6.49988	5.84615	2.46274	0.0103735
1442214_at	n.a.*	5.16265	5.705	6.71865	6.74874	6.08376	2.46207	0.0137464
1428851_at	1300014I06Rik	6.57367	6.77913	7.74309	8.2086	7.32612	2.46134	0.0125018
1448323_a_at	Bgn	7.21317	7.03218	8.24583	8.59653	7.77193	2.45974	0.00916744
1424211_at	Slc25a33	5.07922	5.25069	6.44804	6.47736	5.81383	2.45844	0.00558046
1429831_at	Pik3ap1	5.07266	5.37562	6.37851	6.6652	5.87299	2.45839	0.00980136
1424948_x_at	H2-D1	9.75808	10.1601	11.2135	11.299	10.6077	2.45742	0.00962289
1450033_a_at	Stat1	9.49346	9.54701	10.8474	10.7866	10.1686	2.45681	0.00507219
1456147_at	St8sia6	6.08603	6.50466	7.50817	7.67463	6.94337	2.45557	0.0107429
1423250_a_at	Tgfb2	4.65781	4.66981	6.10371	5.8156	5.31173	2.4552	0.00703468
1455892_x_at	n.a.*	10.8078	11.1778	12.0097	12.5615	11.6392	2.4501	0.0191938
1438200_at	Sulf1	6.00437	5.93943	7.20422	7.32513	6.61829	2.44998	0.00537492
1451775_s_at	Il13ra1	5.05282	4.96355	6.23383	6.36799	5.65455	2.44991	0.00554099
1431803_at	Cyp2d13	4.39818	4.57009	5.83007	5.72028	5.12965	2.44705	0.00588531
1424770_at	Cald1	7.09683	6.47529	8.44931	7.70417	7.4314	2.44643	0.0393947
1450410_a_at	4930570C03Rik	7.20984	7.07155	8.36954	8.49288	7.78595	2.44616	0.00573785
1436499_at	Sgms1	6.37668	6.33686	7.45788	7.83609	7.00188	2.44565	0.00901254
1426235_a_at	Glul	7.62317	7.75893	9.26746	8.69461	8.33604	2.44526	0.0158599
1451755_a_at	Apobec1	7.33483	7.10107	8.41379	8.59735	7.86176	2.44125	0.00729845
1436395_at	Card6	6.48735	6.63484	7.72985	7.96679	7.20471	2.44057	0.00700984
1419734_at	Actb	9.78825	8.78765	10.7731	10.3773	9.93155	2.44055	0.0488847
1445534_at	n.a.*	6.94305	6.74808	7.90093	8.36411	7.48904	2.44012	0.0126011
1449342_at	Ptplb	8.03957	8.16887	9.46576	9.31518	8.74735	2.43893	0.00587883
1431262_at	EG666772	5.00616	5.07904	6.14766	6.509	5.68547	2.43805	0.00882299
1417810_a_at	Pacsin2	8.36321	8.41446	9.50546	9.84327	9.0316	2.43772	0.00822861
1445897_s_at	Ifi35	9.58738	9.51528	10.83	10.8408	10.1934	2.43521	0.00515083
1442420_at	n.a.*	4.65525	4.46527	6.14377	5.54403	5.20208	2.43453	0.0178394
1460415_a_at	Cd40	6.5858	6.38915	7.77833	7.76347	7.12919	2.43417	0.00588531
1424302_at	Lilrb3	5.62486	5.38234	6.96721	6.60571	6.14503	2.4332	0.0105759
1425451_s_at	Chi3l3	5.27605	5.4493	6.83042	6.45948	6.00381	2.43222	0.00989197
1428660_s_at	Tor3a	6.21748	6.13745	7.50665	7.41196	6.81839	2.43149	0.00537492
1417292_at	Ifi47	10.0501	10.0685	11.4022	11.2787	10.6999	2.43034	0.00537492
1421285_at	Pik3ap1	4.76736	5.15008	6.29796	6.18139	5.5992	2.42999	0.00963771
1455500_at	Rnf213	9.60426	9.66702	11.0842	10.7484	10.276	2.42951	0.00831717
1450984_at	Tjp2	5.95017	6.22347	7.47983	7.25472	6.72705	2.42915	0.0085748
1438439_at	Gpr171	8.30695	8.27513	9.49964	9.64192	8.93091	2.42795	0.00554099
1425227_a_at	Atp6v0a1	4.64476	4.30278	5.61435	5.89108	5.11324	2.42661	0.0107693
1417116_at	Slc6a8	6.45281	6.832	7.5413	8.30004	7.28154	2.42547	0.0308054
1436866_at	Efna5	6.30366	6.3886	7.78286	7.46571	6.98521	2.42528	0.00805713
1454736_at	Ankrd57	5.73575	6.17499	7.11866	7.34456	6.59349	2.42208	0.0125668
1443969_at	Irs2	6.21431	5.44295	7.44174	6.7644	6.46585	2.41905	0.0454923
1455490_at	Ubtf	4.61699	4.77148	6.07508	5.86068	5.33106	2.41771	0.00696656
1425506_at	Mylk	6.66864	6.87936	7.87139	8.22374	7.41078	2.41758	0.0101002
1423035_s_at	Txndc17	9.38325	8.86728	10.1903	10.6011	9.76048	2.41234	0.0198614
1439347_at	Tns4	5.53684	5.80764	6.9073	6.97385	6.30641	2.40884	0.00723255
1460231_at	Irf5	6.59751	6.59167	7.7876	7.93737	7.22854	2.4081	0.0056437
1420089_at	Nfkbia	6.62999	7.16282	7.91568	8.41274	7.53031	2.40795	0.0236833
1444808_at	n.a.*	4.52112	4.48521	5.89094	5.65057	5.13696	2.40759	0.00675091
1448301_s_at	Serpinb1a	5.37152	5.26656	6.2851	6.88499	5.95204	2.40495	0.0175193
1426368_at	Rin2	5.97055	6.05855	7.19986	7.36037	6.64733	2.40421	0.00592317
1426139_a_at	Ccrl1	6.1442	6.1771	7.40191	7.44457	6.79194	2.39926	0.00526505
1457753_at	Tlr13	4.56601	4.55539	5.83096	5.81392	5.19157	2.39785	0.0052122
1436271_at	Apol7b	6.36756	6.35431	7.18972	8.05485	6.99161	2.3972	0.0331705
1429359_s_at	Rbpms	4.70208	5.10544	6.07328	6.25562	5.53411	2.39611	0.0112235
1456434_x_at	Hspb8	7.0228	6.74298	8.35798	7.9265	7.51256	2.39387	0.0137482
1445031_at	n.a.*	6.32075	6.24346	7.2791	7.80331	6.91166	2.39346	0.0143441
1417124_at	Dstn	9.8063	9.77429	10.8298	11.2664	10.4192	2.39132	0.0111583
1438325_at	Evi1	5.24564	5.18913	6.33289	6.61738	5.84626	2.39122	0.0076211
1456003_a_at	Slc1a4	5.06602	5.19506	6.40135	6.37403	5.75912	2.39022	0.00561424
1428781_at	Dmkn	5.90992	5.91886	7.3062	7.03675	6.54293	2.39013	0.00723255
1416515_at	Fscn1	5.32746	4.67934	6.43304	6.08604	5.63147	2.38856	0.0246418
1449478_at	Mmp7	5.34653	5.50584	6.69982	6.66464	6.05421	2.38839	0.00586499
1425333_at	Rab43	7.01725	6.9754	8.27923	8.22541	7.62432	2.38832	0.00534173
1454240_at	Nfe2l3	5.12463	4.5526	6.20185	5.98523	5.46608	2.38655	0.0180423
1443783_x_at	H2-Aa	6.36497	6.66558	7.49931	8.0405	7.14259	2.38607	0.0184236
1425434_a_at	Msr1	4.85311	4.90181	6.09049	6.1724	5.50445	2.38499	0.00546514
1441577_at	C530014P21Rik	5.81139	5.72498	7.10246	6.94186	6.39517	2.38497	0.006004
1437358_at	Wdfy1	5.4687	5.56668	6.54428	6.99901	6.14467	2.38494	0.0121359
1448613_at	Ecm1	6.0033	6.17603	7.3362	7.35069	6.71655	2.38466	0.00593275
1452114_s_at	Igfbp5	8.66862	9.149	10.3965	9.92799	9.53552	2.38405	0.0211286
1430003_at	6330412A17Rik	4.78227	5.00112	6.09787	6.19052	5.51794	2.38254	0.00685882
1455078_at	Ssh2	8.76413	9.10568	9.96831	10.4055	9.56091	2.38173	0.015603
1416329_at	Cyfip1	7.69499	7.7562	8.75045	9.20458	8.35156	2.38159	0.0119071
1415797_at	Ddr1	6.29974	6.53201	7.55418	7.78037	7.04157	2.38072	0.00837788
1441115_at	D18Ertd232e	6.28471	6.10362	7.25981	7.63034	6.81962	2.37992	0.0105768
1423274_at	Ints6	5.60703	5.25459	6.37689	6.98543	6.05598	2.37899	0.0230316
1425137_a_at	H2-Q10	4.25838	4.94979	5.98614	5.72266	5.22924	2.37893	0.0253095
1419609_at	Ccr1	4.61156	4.23863	5.66804	5.68058	5.0497	2.37711	0.00954088
1459078_at	n.a.*	4.60708	4.67007	5.98544	5.78649	5.26227	2.37412	0.00650133
1452995_at	Nudt17	5.92192	5.33237	6.86468	6.88355	6.25063	2.37342	0.0172987
1423994_at	Kif1b	7.17133	7.4778	8.27432	8.86802	7.94787	2.37282	0.0212778
1420838_at	Ntrk2	6.37536	6.49138	7.93483	7.42512	7.05667	2.37282	0.0144259
1425896_a_at	Fbn1	5.34927	5.40177	6.52582	6.71798	5.99871	2.37245	0.00639191
1427689_a_at	Tnip1	9.20133	9.25895	10.4237	10.528	9.85299	2.37134	0.00563856
1460678_at	Klhdc2	5.49593	5.57002	6.61352	6.9435	6.15574	2.37106	0.0088152
1445020_at	n.a.*	4.80246	4.41387	6.03227	5.67445	5.23076	2.37051	0.0147257
1418448_at	Rras	7.01167	6.89861	8.2451	8.1548	7.57754	2.36987	0.00583542
1420273_x_at	n.a.*	7.51605	7.2147	8.62859	8.59167	7.98775	2.36978	0.00807035
1435448_at	Bcl2l11	8.74882	9.34471	10.0252	10.5566	9.66884	2.3688	0.0292964
1422230_s_at	Cyp2a4	6.25608	6.23384	7.18065	7.7961	6.86667	2.36758	0.0186208
1452387_a_at	Amotl2	5.96708	6.40461	7.3826	7.47193	6.80655	2.36431	0.0118065
1433833_at	Fndc3b	7.34485	7.56073	8.53476	8.85261	8.07324	2.36345	0.010033
1416435_at	Ltbr	6.31439	6.05427	7.43528	7.41513	6.80477	2.36342	0.00733298
1416593_at	Glrx	6.82184	6.69084	7.96514	8.0239	7.37543	2.35901	0.00587469
1451931_x_at	H2-L	11.2585	11.4418	12.4288	12.7464	11.9689	2.35779	0.00959539
1434059_at	B230312A22Rik	5.48377	5.57934	6.51899	7.01835	6.15011	2.35726	0.0141516
1422403_at	Ifna1	4.4764	4.42876	5.65783	5.7191	5.07052	2.35526	0.00554194
1444028_s_at	Dock9	7.3791	7.86447	8.66198	9.05194	8.23937	2.35411	0.0193368
1427405_s_at	Rab11fip5	5.11264	5.36921	6.16716	6.78305	5.85801	2.35247	0.0217348
1457324_at	n.a.*	6.03445	6.13745	7.6691	6.97089	6.70297	2.35224	0.0239408
1434438_at	Samhd1	7.83945	7.90391	9.2332	8.97649	8.48826	2.35082	0.00750864
1426716_at	Tdrd7	6.6133	6.65763	7.93091	7.80611	7.25199	2.35062	0.00585455
1450009_at	Ltf	5.87442	6.52324	7.4735	7.38904	6.81505	2.34964	0.0211262
1440400_at	n.a.*	4.84741	4.70826	6.01289	6.00646	5.39375	2.34866	0.00588531
1449357_at	2310030G06Rik	4.66932	4.55283	5.55708	6.12689	5.22653	2.34715	0.0174767
1427475_a_at	Pdlim5	7.70812	7.96433	8.87611	9.25735	8.45148	2.34649	0.0125038
1426858_at	Inhbb	5.19334	5.53856	6.62243	6.57046	5.9812	2.34648	0.0092909
1422010_at	Tlr7	5.44354	5.40613	6.71042	6.59891	6.03975	2.3454	0.00580085
1417872_at	Fhl1	5.78261	6.32796	7.41891	7.15088	6.67009	2.34505	0.0187497
1419879_s_at	Trim25	9.61089	9.85073	10.7871	11.1331	10.3454	2.3445	0.0112522
1435330_at	Pyhin1	9.39434	9.4931	10.5558	10.79	10.0583	2.34435	0.00736337
1434652_at	Cdc42bpb	5.96327	5.89702	7.13529	7.18113	6.54418	2.34253	0.00561021
1454877_at	Sertad4	4.91118	5.23164	6.25598	6.34121	5.685	2.34109	0.0089785
1452417_x_at	Igk-C	10.8764	11.4183	12.4133	12.3345	11.7606	2.33999	0.0160932
1452502_at	ENSMUSG00000050599	5.2463	5.50578	6.5495	6.65166	5.98831	2.33681	0.00789651
1422804_at	Serpinb6b	7.41289	7.50215	8.52124	8.83933	8.0689	2.33393	0.00902856
1435086_s_at	Klhdc2	7.10529	7.05596	8.05455	8.5521	7.69197	2.33383	0.0142192
1455908_a_at	Scpep1	6.71004	6.89336	7.95442	8.09414	7.41299	2.33364	0.00710859
1453076_at	Batf3	6.00726	5.97632	7.26775	7.15856	6.60247	2.33167	0.00584966
1437807_x_at	Ctnna1	9.14123	9.24681	10.2812	10.5379	9.80178	2.32227	0.00803647
1439349_at	Sbno2	6.64058	7.21181	8.15589	8.12752	7.53395	2.32223	0.0175655
1426936_at	BC005512	7.13226	7.28345	8.55574	8.29032	7.81544	2.32168	0.00860797
1423110_at	Col1a2	4.21492	4.56625	5.47567	5.73384	4.99767	2.32007	0.012143
1449246_at	Rundc3a	5.50017	5.32928	6.72166	6.53514	6.02156	2.31927	0.0076211
1429206_at	Rhobtb1	5.35103	5.45971	6.59011	6.6477	6.01214	2.31904	0.00593275
1416600_a_at	Rcan1	7.29279	7.00581	8.28306	8.44224	7.75597	2.31876	0.00908549
1437785_at	Adamts9	6.21775	6.4137	7.525	7.53116	6.9219	2.31716	0.00681418
1423902_s_at	Arhgef12	6.80058	7.39348	8.42491	8.19278	7.70294	2.31629	0.021063
1455825_s_at	Lnx1	5.64074	5.76339	6.93996	6.88644	6.30763	2.3152	0.00604515
1434278_at	Mtm1	9.42345	9.22986	10.4546	10.6206	9.93212	2.31486	0.00769316
1425868_at	Hist2h2bb	4.5921	4.29138	5.9894	5.31234	5.04631	2.31198	0.0275274
1417856_at	Relb	7.08037	7.10703	8.29481	8.31042	7.69816	2.31164	0.0056324
1449702_at	Zfand2a	6.819	6.86721	7.70459	8.39876	7.44739	2.31108	0.0246128
1419026_at	Daxx	8.21903	7.89659	9.34131	9.191	8.66198	2.31072	0.00991827
1418555_x_at	Spic	5.95488	5.62262	6.74162	7.25245	6.39289	2.31063	0.0197673
1438606_a_at	Clic4	9.56779	9.62868	10.7191	10.8905	10.2015	2.30789	0.00670964
1441230_at	n.a.*	4.54925	4.98728	6.09478	5.85249	5.37095	2.30597	0.0147954
1435454_a_at	BC006779	8.84724	9.16338	10.1902	10.231	9.60795	2.30584	0.00906245
1444242_at	Slco2a1	5.54366	5.24847	6.43649	6.76514	5.99844	2.30498	0.0125859
1436970_a_at	Pdgfrb	5.57517	6.01393	6.83688	7.15613	6.39553	2.3005	0.0166722
1449220_at	Gimap3	7.78954	8.14734	9.24353	9.09693	8.56934	2.30025	0.0108746
1433699_at	Tnfaip3	9.77508	10.0037	10.8694	11.3117	10.49	2.2992	0.0148119
1425545_x_at	H2-D1	11.506	11.8291	12.7112	13.0256	12.268	2.29875	0.0130328
1427511_at	B2m	7.14135	7.69332	8.65783	8.57429	8.0167	2.29536	0.0175375
1425505_at	Mylk	5.36222	5.35737	6.40012	6.71627	5.959	2.29485	0.00908549
1435644_at	Sh3pxd2b	6.64739	6.6058	7.70817	7.93834	7.22492	2.29208	0.00755038
1451680_at	Srxn1	5.58279	5.15407	6.11796	7.01185	5.96667	2.29179	0.0494468
1421313_s_at	Cttn	5.54512	5.63455	6.8095	6.76085	6.18751	2.28998	0.00597757
1431117_x_at	1810029B16Rik	7.53539	6.96335	8.66548	8.22303	7.84681	2.28926	0.0272205
1447624_s_at	Stox2	7.49953	7.6068	8.71479	8.77952	8.15016	2.28785	0.00621901
1421998_at	Tor3a	5.29715	5.26751	6.4706	6.48047	5.87893	2.2866	0.00580243
1424863_a_at	Hipk2	5.99993	6.03853	7.01212	7.41149	6.61552	2.2856	0.0115268
1424245_at	Ces2	5.24603	5.41937	6.27782	6.77202	5.92881	2.28504	0.0161908
1433645_at	Slc44a1	8.05453	8.17316	8.96478	9.6459	8.70959	2.28389	0.0253095
1458440_at	Specc1	4.37039	4.54279	5.25696	6.03838	5.05213	2.28324	0.0329278
1424617_at	Ifi35	8.37942	8.25401	9.61057	9.40459	8.91215	2.28289	0.00775269
1417426_at	Srgn	11.3546	11.4617	12.4919	12.7043	12.0031	2.2815	0.00773198
1439925_at	Tm4sf1	4.53918	4.69504	6.05074	5.5632	5.21204	2.28131	0.0157929
1448775_at	Ifi203	8.63696	8.81322	9.89614	9.93327	9.3199	2.28092	0.00691157
1442183_at	LOC236069	6.80535	6.65172	8.40558	7.43027	7.32323	2.28056	0.0497068
1456174_x_at	Ndrg1	8.00242	7.71829	8.76375	9.33383	8.45457	2.27905	0.0220206
1421674_at	n.a.*	5.3026	5.09545	6.71221	6.05974	5.7925	2.27671	0.0250921
1440830_at	Gpr116	5.43848	6.38111	7.0597	7.13244	6.50293	2.27564	0.0459023
1426670_at	Agrn	6.69406	7.00735	8.03297	8.0405	7.44372	2.27526	0.00928281
1416286_at	Rgs4	5.60824	5.94457	6.68059	7.24411	6.36938	2.27512	0.0233232
1419089_at	Timp3	6.72575	6.60441	7.87445	7.82698	7.2579	2.27463	0.00642435
1422978_at	Cybb	6.15241	5.8442	7.15627	7.20984	6.59068	2.27323	0.00929282
1449550_at	Myo1c	4.91415	4.91373	5.85511	6.34039	5.50585	2.27176	0.0148331
1454959_s_at	Gnai1	5.43263	5.45755	6.74858	6.50888	6.03691	2.27149	0.00786838
1452123_s_at	Frmd4b	6.97797	6.9282	7.95567	8.31693	7.54469	2.27082	0.0107046
1448914_a_at	Csf1	4.91766	5.32842	6.23601	6.37528	5.71434	2.26986	0.0129069
1422788_at	Slc43a3	7.26611	6.87729	8.17514	8.33182	7.66259	2.26857	0.0124191
1416165_at	Rab31	5.71923	5.55481	6.5473	7.0891	6.22761	2.26763	0.0185913
1449519_at	Gadd45a	6.53991	6.94681	7.59693	8.25154	7.3338	2.26715	0.0313509
1434376_at	Cd44	7.71713	7.92976	8.6893	9.31921	8.41385	2.26705	0.0240854
1421628_at	Il18r1	6.76541	6.76178	7.8914	7.99561	7.35355	2.26563	0.00622857
1460273_a_at	Naip2	4.65632	4.71845	5.68331	6.04644	5.27613	2.26182	0.010901
1448392_at	LOC100046740	7.42752	7.38533	8.57963	8.58616	7.99466	2.26023	0.00593275
1445137_at	n.a.*	4.37434	4.63269	5.80143	5.55816	5.09165	2.25993	0.0105759
1435463_s_at	Myo1d	5.59546	5.51979	6.59065	6.87616	6.14552	2.25915	0.00906245
1419499_at	Gpam	7.91104	8.27316	9.40309	9.13156	8.67971	2.25828	0.013793
1442201_at	n.a.*	5.19286	5.23923	6.35463	6.4273	5.8035	2.2578	0.00616204
1444524_at	LOC100043424	5.83811	5.48475	6.95834	6.71201	6.2483	2.25596	0.0130579
1416933_at	Por	7.18757	7.2477	8.29338	8.48876	7.80435	2.25548	0.00739644
1434830_at	Mxd1	6.78532	7.17062	8.09401	8.20515	7.56378	2.25263	0.0120401
1418701_at	Comt	6.85847	6.15042	7.53843	7.81243	7.08994	2.25165	0.0310951
1439795_at	Gpr64	6.31075	6.41903	7.31123	7.75973	6.95018	2.25104	0.0142677
1434268_at	Adar	8.24922	8.52366	9.43313	9.68076	8.97169	2.25091	0.0111092
1434773_a_at	Slc2a1	7.07107	7.27667	8.19952	8.48845	7.75893	2.2503	0.0107095
1450276_a_at	Scin	6.89628	6.83336	7.7451	8.32323	7.44949	2.24909	0.0199199
1440209_at	n.a.*	4.73417	4.50081	5.65314	5.92024	5.20209	2.24886	0.0107291
1458773_at	n.a.*	4.83951	4.81737	6.07802	5.91607	5.41274	2.24794	0.00699364
1443621_at	Fbxo39	4.87193	4.22845	5.78842	5.64627	5.13377	2.24569	0.0244163
1451200_at	Kif1b	6.8697	6.81432	7.87521	8.13599	7.42381	2.24014	0.00872154
1459546_s_at	Enpp1	4.63516	4.79019	5.80257	5.94941	5.29433	2.23972	0.00775224
1460474_at	2610028L16Rik	6.3351	6.77342	8.09797	7.3371	7.1359	2.23965	0.0416253
1427878_at	0610010O12Rik	6.86718	6.60557	7.7748	8.02359	7.31778	2.23895	0.0110209
1424214_at	9130213B05Rik	6.38873	6.7336	7.38353	8.06333	7.1423	2.23808	0.0319792
1450534_x_at	H2-K1	6.05355	6.05038	7.11278	7.31392	6.63266	2.23672	0.00759376
1446245_at	n.a.*	6.13501	6.61102	7.62876	7.43914	6.95348	2.23603	0.0167453
1431364_a_at	2810047C21Rik	4.95077	5.48541	6.31891	6.43785	5.79824	2.23503	0.0184816
1451784_x_at	H2-D1	11.4638	11.8607	12.6673	12.9777	12.2424	2.23496	0.0164202
1445944_at	n.a.*	4.50072	4.69991	6.01148	5.50808	5.18005	2.23374	0.018226
1424536_at	Oas1e	6.32898	6.3142	7.50575	7.45467	6.9009	2.23244	0.00622656
1448393_at	Cldn7	5.71482	5.48213	6.6437	6.87047	6.17778	2.23242	0.0101749
1435465_at	Kbtbd11	9.16114	9.34992	10.3766	10.4515	9.8348	2.23232	0.00768846
1440866_at	Eif2ak2	5.63907	5.6974	6.90736	6.7453	6.24728	2.23163	0.00722744
1423271_at	Gjb2	5.39278	5.42214	6.51412	6.61597	5.98625	2.23084	0.00658944
1418511_at	Dpt	6.61092	6.13745	7.61654	7.44534	6.95256	2.22955	0.016513
1431705_a_at	Mcoln2	5.53056	5.57644	6.92183	6.49736	6.13154	2.22853	0.0134508
1448026_at	n.a.*	4.68365	4.98354	6.34565	5.63263	5.41137	2.22769	0.0333618
1436555_at	Slc7a2	6.19549	5.91251	7.39933	7.01725	6.63114	2.22574	0.0154051
1423393_at	Clic4	10.0311	9.93677	11.1725	11.1031	10.5609	2.22513	0.00676978
1435494_s_at	Dsp	9.41432	9.08253	10.0024	10.8021	9.82532	2.22497	0.0413704
1425974_a_at	Trim25	9.07592	9.4412	10.2417	10.5826	9.83537	2.22473	0.0164592
1433796_at	Endod1	6.15445	5.82401	7.01725	7.26617	6.56547	2.22295	0.0130469
1450672_a_at	Trex1	7.62688	7.45952	8.82271	8.56835	8.11937	2.22273	0.00977991
1433775_at	C77080	6.25699	6.49451	7.24526	7.8109	6.95192	2.22272	0.0224315
1418168_at	Zcchc14	5.28307	5.15586	6.50701	6.23502	5.79524	2.22153	0.00967283
1415856_at	Emb	8.99565	9.1403	9.96448	10.4742	9.64365	2.22121	0.0179715
1433579_at	Tmem30b	6.38212	6.60836	7.18526	8.10553	7.07032	2.21938	0.0497068
1418753_at	Gfpt2	5.61998	5.79272	7.31299	6.39683	6.28063	2.21693	0.0483137
1459914_at	Mcart6	5.3275	5.5185	6.63418	6.50812	5.99707	2.2163	0.00828966
1441870_s_at	Pkd2	6.25056	6.49848	7.3948	7.6495	6.94834	2.21549	0.0112155
1448916_at	Mafg	6.65089	6.80142	7.96457	7.78201	7.29972	2.21473	0.00841003
1442798_x_at	Hk3	4.55218	4.89409	6.03	5.7085	5.29619	2.21318	0.0154195
1429128_x_at	Nfkb2	7.47114	7.74913	8.89731	8.61092	8.18212	2.2099	0.0127543
1421117_at	Dst	6.2733	5.8876	6.90736	7.54005	6.65208	2.2088	0.031648
1453006_at	Fgfbp3	4.55766	4.4361	5.37037	5.90668	5.0677	2.20632	0.019412
1417829_a_at	Rab15	7.66206	7.68018	8.74426	8.88123	8.24193	2.20629	0.00708846
1452202_at	Pde2a	5.75768	6.00444	6.93833	7.10506	6.45138	2.20478	0.00986871
1427165_at	Il13ra1	5.55173	5.6872	6.61536	6.90403	6.18958	2.20416	0.01041
1447938_at	ENSMUSG00000073868	5.33381	5.45705	6.65292	6.4184	5.96554	2.20416	0.00906245
1415940_at	Zfand2a	7.39986	7.3393	8.16007	8.85674	7.93899	2.20202	0.0287261
1434694_at	Lrrc8a	6.53558	6.42292	7.55396	7.68206	7.04863	2.20191	0.00750864
1436959_x_at	Nelf	7.85341	7.83362	8.81797	9.14629	8.41282	2.20169	0.0107131
1428662_a_at	Hopx	7.67124	7.81564	8.84705	8.91601	8.31248	2.20089	0.00736316
1418406_at	Pde8a	5.52893	5.70168	6.48945	7.01725	6.18433	2.20083	0.0198913
1452284_at	Ptprz1	5.36419	5.49764	6.3789	6.7565	5.99931	2.19891	0.0130275
1442120_at	ENSMUSG00000073180	5.57352	5.62914	6.9299	6.546	6.16964	2.19865	0.0125668
1445597_s_at	Hrasls3	8.77821	8.20098	9.52757	9.72352	9.05757	2.19763	0.0230252
1460356_at	Esam1	6.19772	6.61071	7.58526	7.49493	6.97215	2.19753	0.0138424
1436044_at	Scn7a	4.73229	5.05147	5.6472	6.40647	5.45936	2.19612	0.0392544
1451554_a_at	Aph1a	8.02963	7.89395	9.12451	9.06738	8.52887	2.1949	0.00729845
1454834_at	Nfib	5.97624	6.30928	7.36253	7.19082	6.70972	2.19454	0.0121865
1417327_at	Cav2	6.85192	7.19373	8.13682	8.17374	7.58905	2.19231	0.0112235
1434410_at	BC043118	5.26638	5.56554	6.60485	6.48868	5.98136	2.1898	0.0106851
1424138_at	Rhbdf1	6.00654	6.01757	7.22776	7.05715	6.57725	2.18919	0.00768846
1443962_at	Tfdp2	6.16942	6.2118	6.8775	7.76347	6.75555	2.18841	0.045662
1435800_a_at	Csda	8.99805	8.5921	9.87699	9.97139	9.35963	2.18724	0.0138316
1421571_a_at	Ly6c1	8.8331	9.09305	10.0985	10.0856	9.52758	2.18707	0.00919032
1448611_at	Wwc2	5.69037	5.96031	6.67133	7.23514	6.38929	2.18539	0.0243693
1423721_at	Tpm1	7.56813	7.67976	8.50791	8.99134	8.18679	2.18205	0.0173718
1418318_at	Rnf128	6.38279	6.2034	7.15095	7.68389	6.85526	2.17999	0.0209163
1455164_at	Cdgap	7.86657	7.71713	8.75669	9.07384	8.35356	2.17862	0.0117026
1448890_at	Klf2	8.01218	8.0599	9.06381	9.25481	8.59767	2.17841	0.00816547
1441972_at	6230424C14Rik	5.83729	6.05779	6.97856	7.16159	6.5088	2.17729	0.010006
1447303_at	n.a.*	4.53086	4.57607	5.92186	5.429	5.11445	2.17643	0.0174576
1437003_at	n.a.*	5.71589	5.91186	6.8801	6.99068	6.37463	2.17576	0.00868391
1426775_s_at	Scamp1	6.31286	6.15555	7.10406	7.60604	6.79463	2.17475	0.0190346
1419832_s_at	Acpp	4.94821	4.954	6.14678	5.99604	5.51126	2.17393	0.00757605
1424544_at	Nrbp2	5.72998	6.34207	7.04844	7.26406	6.59614	2.17381	0.026561
1433617_s_at	B4galt5	6.43249	6.36813	7.51836	7.52225	6.96031	2.17347	0.00686798
1450627_at	Ank	7.27568	7.93853	8.8695	8.58455	8.16707	2.17335	0.0317539
1418076_at	St14	5.72489	5.68161	6.81531	6.83086	6.26317	2.17322	0.00681418
1456153_at	Ssh2	8.77943	9.22157	9.87637	10.3636	9.56025	2.17272	0.027195
1445718_at	n.a.*	5.11187	5.45953	6.23571	6.57435	5.84536	2.17246	0.0170887
1417148_at	Pdgfrb	4.79548	4.96013	5.97519	6.01594	5.43668	2.1701	0.00785459
1452231_x_at	Ifi203	10.23	10.6435	11.4911	11.6177	10.9956	2.16987	0.0148277
1417565_at	Abhd5	5.2436	4.99379	6.18156	6.29066	5.6774	2.16958	0.00976709
1454713_s_at	Hdc	6.90171	6.18107	7.7247	7.5929	7.1001	2.16957	0.0328357
1416442_at	Ier2	7.7985	8.21694	9.30558	8.94349	8.56613	2.16868	0.0207584
1450629_at	Lima1	7.24117	7.10182	8.2611	8.3154	7.72987	2.16859	0.00762575
1448612_at	Sfn	6.47116	6.36906	7.47782	7.59473	6.97819	2.1677	0.00769691
1432176_a_at	Eng	5.56059	5.4738	6.74353	6.52199	6.07498	2.1668	0.00904708
1426792_s_at	Rusc2	5.76703	5.84208	6.86943	6.96977	6.36208	2.16602	0.00735377
1438636_s_at	Susd5	6.51859	6.25369	7.63659	7.36576	6.94366	2.166	0.0128657
1432026_a_at	Herc5	6.65048	6.41094	7.80917	7.48161	7.08805	2.16546	0.0138433
1426599_a_at	Slc2a1	6.84285	6.83539	7.67337	8.23059	7.39555	2.16274	0.0211262
1453285_at	Tmem88	5.55251	5.73112	6.75198	6.75394	6.19739	2.16016	0.00809067
1449036_at	Rnf128	5.90472	5.7307	6.48766	7.36982	6.37323	2.16	0.0488258
1460194_at	Phyh	6.85224	7.69348	8.53971	8.22783	7.82832	2.15982	0.0486304
1455840_at	Rapgef5	6.78867	6.35143	7.646	7.71065	7.12419	2.15587	0.0155764
1449235_at	Fasl	5.02203	5.12249	6.10341	6.25721	5.62629	2.15555	0.00825634
1436598_at	Icos	7.82183	8.15524	8.91464	9.27291	8.54116	2.15135	0.0178394
1453571_at	Depdc6	6.74901	6.79785	7.99108	7.76578	7.32593	2.151	0.00906245
1416530_a_at	Pnp	9.28724	9.41454	10.4814	10.4284	9.90288	2.14948	0.00769691
1447807_s_at	Plekhh1	4.70377	4.88659	5.62856	6.16825	5.34679	2.14835	0.0222344
1430633_s_at	C430045I18Rik	6.34795	6.55321	7.58824	7.51912	7.00213	2.14816	0.00889062
1426436_at	Tmem159	5.53817	6.00002	6.78189	6.95836	6.31961	2.14508	0.0182737
1442969_at	n.a.*	5.49328	5.38419	6.8924	6.1839	5.98844	2.14268	0.0328816
1451756_at	Flt1	4.83787	5.14218	6.18127	5.99748	5.5397	2.14258	0.0125038
1431095_a_at	Herc5	7.2205	7.18006	8.56758	8.02905	7.7493	2.14062	0.020896
1448363_at	Yap1	7.27996	7.12242	8.27631	8.32152	7.75005	2.14017	0.00812845
1426979_at	Mlxip	7.92448	8.06858	9.0203	9.16809	8.54536	2.14008	0.00882299
1458550_at	Myo1d	4.58785	4.38169	5.4098	5.75436	5.03342	2.13955	0.0142387
1436150_at	n.a.*	6.15274	5.86638	7.09697	7.11675	6.55821	2.13954	0.0105644
1435943_at	Dpep1	4.84706	5.16115	6.35356	5.84887	5.55266	2.13926	0.0241018
1452579_at	Iscu	8.57024	8.54473	9.67177	9.63739	9.10604	2.13923	0.00709134
1416405_at	Bgn	7.72983	7.59403	8.66759	8.84938	8.21021	2.13844	0.00917247
1455697_at	n.a.*	5.141	5.18273	6.28707	6.22875	5.70989	2.13769	0.00723255
1456772_at	Ncf1	7.22116	7.14838	8.28078	8.28078	7.73277	2.13762	0.00723255
1427418_a_at	Hif1a	10.0701	10.3805	11.182	11.4601	10.7732	2.13731	0.0148894
1427660_x_at	Igk-C	11.1592	11.7101	12.5696	12.4911	11.9825	2.13712	0.0218623
1417562_at	Eif4ebp1	6.68338	6.67589	8.17009	7.37986	7.22731	2.13663	0.0396427
1423034_at	Txndc17	8.59973	8.19338	9.20581	9.77626	8.9438	2.13535	0.0318992
1427180_at	Slc27a3	4.59347	4.85079	5.56673	6.06562	5.26915	2.13472	0.0221895
1418269_at	Loxl3	4.73487	4.77645	5.91028	5.78899	5.30264	2.13461	0.00775269
1451230_a_at	Wbp5	9.76429	9.53498	10.5581	10.9281	10.1964	2.13386	0.015814
1418936_at	Maff	5.71736	5.86078	6.80635	6.95454	6.33476	2.13077	0.00892833
1418747_at	Sfpi1	6.14407	5.84438	7.18221	6.98888	6.53989	2.13069	0.012793
1419387_s_at	Muc13	6.25074	6.26105	7.34231	7.35055	6.80116	2.12954	0.00712015
1438498_at	Zmynd15	6.40498	6.09002	7.3013	7.37465	6.79274	2.12944	0.0117594
1425983_x_at	Hipk2	6.58491	6.61903	7.57414	7.80963	7.14693	2.12861	0.00955278
1429024_at	Rbm20	4.72781	4.70611	5.69299	5.92021	5.26178	2.1282	0.00935199
1446346_at	Adamts9	5.85673	6.02987	7.20784	6.85632	6.48769	2.12694	0.0141516
1441995_at	n.a.*	4.86733	4.89719	6.19606	5.7455	5.42652	2.12656	0.0166715
1426246_at	Pros1	5.71299	6.00002	6.92916	6.95756	6.39993	2.1241	0.0108216
1419197_x_at	Hamp	4.89631	4.59369	6.22825	5.43521	5.28837	2.12393	0.0461516
1452759_s_at	Ppfibp1	5.72753	6.27331	7.08257	7.09059	6.5435	2.12308	0.0217348
1417818_at	Wwtr1	6.61808	7.06042	7.73529	8.11527	7.38226	2.12288	0.0240144
1423025_a_at	Schip1	5.16107	4.91227	6.12416	6.12108	5.57965	2.12277	0.00991093
1422005_at	Eif2ak2	5.34517	5.1943	6.38801	6.31644	5.81098	2.11769	0.00845977
1420913_at	Slco2a1	6.93804	6.91824	7.91127	8.10979	7.46934	2.11754	0.00899223
1452783_at	Fndc3b	5.64789	5.93851	6.75937	6.9907	6.33412	2.11673	0.0136461
1438716_at	AI451617	6.28559	6.05375	7.60425	6.89842	6.7105	2.11648	0.0364827
1448303_at	Gpnmb	5.54352	5.55771	6.421	6.84343	6.09141	2.11638	0.0156987
1451344_at	Tmem119	5.3599	5.32987	6.55635	6.2963	5.8856	2.11615	0.0103308
1452059_at	Slc35f5	5.2406	5.86182	6.51555	6.74874	6.09168	2.11541	0.0299337
1438973_x_at	Gja1	4.451	5.07666	5.85511	5.83387	5.30416	2.11501	0.027329
1427247_at	D3Bwg0562e	5.13659	5.36852	6.33868	6.32684	5.79266	2.11434	0.00964952
1459564_at	LOC100043819	6.82633	6.95742	8.30508	7.63758	7.4316	2.11323	0.0313812
1450928_at	LOC100045546	5.50017	5.22521	6.28501	6.59826	5.90217	2.11249	0.0155464
1425407_s_at	Clec4a2	5.43445	5.35403	6.24383	6.70101	5.93333	2.11137	0.017689
1420369_a_at	Csn2	7.70597	7.51594	8.27188	9.10519	8.14975	2.11049	0.0476956
1432285_at	1700128F08Rik	5.44879	5.47054	6.67977	6.39437	5.99837	2.11024	0.011009
1431571_at	4933437I04Rik	4.78657	4.88744	5.97934	5.84815	5.37538	2.10926	0.00856082
1445491_at	C79685	5.13376	4.75139	6.39014	5.64845	5.48094	2.10924	0.0457017
1424344_s_at	Eif1a	7.81723	7.23575	8.51191	8.69431	8.0648	2.10908	0.0264943
1423223_a_at	Prdx6	9.57516	9.59685	10.7912	10.5328	10.124	2.10815	0.0103895
1460682_s_at	Ceacam1	6.10999	6.402	7.11675	7.54609	6.79371	2.10735	0.0207949
1448870_at	Ltbp1	4.31976	4.60003	5.14571	5.92333	4.9972	2.10618	0.0451255
1417435_at	Large	5.22691	5.52063	6.24602	6.64944	5.91075	2.1052	0.0197369
1449452_a_at	Gp2	6.09137	6.0009	6.96487	7.27494	6.58302	2.10493	0.0121864
1436254_at	n.a.*	5.09579	5.17115	5.90589	6.50856	5.67035	2.10491	0.0264984
1429900_at	5330406M23Rik	7.13409	7.55435	8.30275	8.53153	7.88068	2.10368	0.0186208
1453287_at	5730557B15Rik	6.96271	6.99838	7.97769	8.1282	7.51675	2.10292	0.00847349
1451986_s_at	Lrrk1	6.36394	6.68175	7.27213	7.91827	7.05902	2.10287	0.0352081
1460469_at	Tnfrsf9	6.87418	6.76399	7.95458	7.8279	7.35516	2.10257	0.00868391
1424375_s_at	Gimap4	9.75048	10.054	10.9745	10.9743	10.4383	2.10254	0.0116294
1419137_at	Shank3	4.8636	4.78401	5.95761	5.83367	5.35972	2.1021	0.00837788
1417081_a_at	Syngr2	9.03391	8.88826	9.98732	10.0781	9.49689	2.10179	0.00875443
1450882_s_at	Gpr137b	5.46377	5.58987	6.26805	6.92875	6.06261	2.10174	0.0313509
1423227_at	Krt17	8.03012	7.47741	8.57756	9.07159	8.28917	2.10061	0.0372149
1415806_at	Plat	5.02644	4.92052	6.11289	5.97528	5.50878	2.10031	0.0088152
1443054_at	Kcnj15	5.47927	5.27604	6.58611	6.30818	5.9124	2.09869	0.0130486
1437493_at	5230400M03Rik	6.08588	6.31194	7.19437	7.3422	6.7336	2.09852	0.0107702
1421754_at	AY036118	9.84704	10.139	10.9902	11.1327	10.5272	2.09719	0.0124111
1415958_at	Slc2a4	6.51641	6.96657	7.96746	7.65161	7.27551	2.09659	0.0229117
1437478_s_at	Efhd2	10.3969	10.5286	11.5095	11.5519	10.9967	2.09644	0.00835633
1435176_a_at	Id2	9.17406	9.51537	10.3241	10.5006	9.87855	2.09603	0.0145891
1428197_at	Tspan9	7.4294	7.38461	8.4746	8.4727	7.94033	2.09455	0.0076211
1435908_at	Nrxn2	5.36444	5.15191	6.64586	6.0022	5.7911	2.09341	0.0322539
1448754_at	Rbp1	6.3021	5.6923	7.16559	6.9583	6.52957	2.0918	0.0295298
1422824_s_at	Eps8	4.50567	4.87895	5.44637	6.0677	5.22467	2.09177	0.0363302
1434955_at	n.a.*	5.08634	5.26574	5.91611	6.56419	5.70809	2.09088	0.0318992
1453191_at	Col27a1	6.85787	6.99348	8.41086	7.56859	7.4577	2.09078	0.0490265
1427387_a_at	Itgb4	5.85439	6.04014	7.13203	6.88922	6.47895	2.0898	0.0119066
1442118_at	n.a.*	4.73888	4.78598	5.97849	5.67263	5.29399	2.08946	0.0120433
1421065_at	Jak2	8.21329	8.36355	9.16859	9.53438	8.81995	2.08936	0.0152051
1417865_at	Tnfaip1	6.29799	6.21206	7.23904	7.39694	6.78651	2.08922	0.00904708
1455450_at	n.a.*	6.00863	5.89224	6.86592	7.16048	6.48181	2.08893	0.0123267
1438974_x_at	Pitpnm1	5.12813	5.36039	6.15973	6.45427	5.77563	2.0889	0.0143684
1442632_at	n.a.*	5.24379	5.34541	6.1661	6.54784	5.82579	2.08836	0.0152121
1457065_at	Upk1b	4.80454	4.87511	6.06296	5.74091	5.37088	2.08798	0.0127567
1419283_s_at	Tns1	7.93577	8.2767	9.34542	8.9909	8.6372	2.08771	0.0199065
1434599_a_at	Tjp2	4.64055	4.529	5.5981	5.69428	5.11548	2.08697	0.00860131
1442789_at	n.a.*	4.38962	4.62529	5.61931	5.51658	5.0377	2.08564	0.0107095
1425649_at	Slc39a14	5.51067	5.2564	6.72377	6.16377	5.91366	2.08527	0.0277802
1448185_at	Herpud1	8.81875	9.00863	9.92221	10.0251	9.44367	2.08486	0.00979831
1441958_s_at	Ager	7.13195	6.62716	7.86105	8.01735	7.40938	2.08442	0.0219873
1417423_at	Grina	8.32865	8.52111	9.69452	9.27396	8.95456	2.08401	0.018431
1452151_at	BC021523	7.68373	7.48335	8.44707	8.83865	8.1132	2.08395	0.0173162
1433712_at	AW555464	6.39242	6.15287	6.98158	7.68187	6.80218	2.0836	0.0382307
1425336_x_at	H2-K1	11.604	12.1375	12.7905	13.0646	12.3992	2.08026	0.0270233
1435198_at	LOC545228	4.96049	4.90986	6.02508	5.95857	5.4635	2.0801	0.00802365
1419272_at	Myd88	7.46278	7.67404	8.61689	8.63105	8.09619	2.07852	0.00980353
1454709_at	Tmem64	8.27692	8.47661	9.144	9.72062	8.90454	2.07851	0.0277626
1418136_at	Tgfb1i1	6.71953	6.55908	7.80195	7.58658	7.16679	2.07766	0.01111
1419322_at	Fgd6	4.81895	4.67265	5.4188	6.18255	5.27324	2.07754	0.0421867
1427121_at	Fbxo4	5.40435	5.53732	6.68519	6.3658	5.99816	2.07723	0.0136139
1417965_at	Plekha1	7.61382	7.72977	8.62684	8.8229	8.19833	2.07495	0.0102168
1439920_at	n.a.*	5.72031	5.13625	6.6835	6.27765	5.95443	2.07382	0.0361847
1436462_at	OTTMUSG00000016327	6.53383	6.44907	7.35348	7.73369	7.01752	2.0736	0.0153679
1427535_s_at	Obsl1	5.2343	5.73741	6.4327	6.64265	6.01177	2.07315	0.0234643
1459906_at	n.a.*	5.6063	5.52414	6.65811	6.57595	6.09113	2.07312	0.00838944
1448995_at	Cxcl4	5.62943	5.60112	6.86818	6.46492	6.14091	2.07236	0.0160461
1424412_at	Ogfrl1	6.82068	6.8811	7.8443	7.95968	7.37644	2.07211	0.00859591
1425850_a_at	Nek6	4.74125	4.56588	5.6059	5.80295	5.17899	2.07177	0.0111073
1451012_a_at	Csda	8.44311	7.96109	9.38161	9.12358	8.72735	2.07124	0.0236488
1438650_x_at	Gja1	6.34486	6.63718	7.64429	7.43772	7.01601	2.07051	0.0141516
1457579_at	D11Ertd717e	5.17244	5.49618	6.54672	6.2218	5.85929	2.07045	0.0186208
1416315_at	Abhd4	6.47774	6.71519	7.52789	7.76482	7.12141	2.07037	0.0133615
1446988_at	n.a.*	4.39962	4.65616	5.64578	5.50936	5.05273	2.07007	0.0118662
1416067_at	Ifrd1	8.78483	8.73434	9.60888	10.0093	9.28434	2.06984	0.0160932
1419721_at	Gpr109a	4.53526	4.53526	5.68179	5.48763	5.05998	2.06975	0.00957879
1436625_at	Fcgr1	5.87362	5.60092	6.63362	6.93896	6.26178	2.06913	0.0163042
1415951_at	Fkbp10	4.55895	4.84479	5.72323	5.777	5.22599	2.06802	0.0118933
1445343_at	Tmed5	4.87247	4.97565	6.05309	5.89108	5.44807	2.06769	0.00956913
1427019_at	Ptprz1	5.68037	5.90849	6.82565	6.85818	6.31818	2.06692	0.010401
1416924_at	Bri3	7.32453	7.18956	8.39108	8.21694	7.78053	2.06617	0.0101914
1456046_at	Cd93	6.48466	6.90985	7.60155	7.88334	7.21985	2.06364	0.0217299
1450234_at	Ms4a6c	7.40514	6.99348	8.43102	8.05625	7.72147	2.0624	0.0246912
1442213_at	LOC552908	6.08247	6.15137	7.36448	6.95756	6.63897	2.06208	0.0166362
1449852_a_at	Ehd4	6.37692	6.40105	7.06581	7.79981	6.9109	2.06169	0.0391075
1448724_at	Cish	6.83889	6.91091	7.75072	8.08533	7.39646	2.06069	0.0137918
1427391_a_at	Col12a1	5.9471	5.90746	7.11846	6.82222	6.44881	2.0606	0.0123475
1417933_at	Igfbp6	5.8762	5.52893	6.98373	6.50699	6.22396	2.06022	0.0271892
1442116_at	Gpr176	4.48786	4.72098	5.42125	5.87243	5.12563	2.05968	0.0217348
1417466_at	Rgs5	8.64137	8.81872	9.68919	9.85571	9.25125	2.05966	0.0107764
1435881_at	Pcbp2	7.64602	7.44947	8.39808	8.78211	8.06892	2.05958	0.0175985
1442439_at	W91776	5.05052	5.60062	6.14766	6.58702	5.84646	2.05875	0.0364091
1422186_s_at	Cyb5r3	7.98179	7.75918	8.98484	8.83933	8.39129	2.05851	0.0113905
1424807_at	Lama4	5.32783	5.55703	6.39234	6.57435	5.96289	2.05754	0.0121888
1460592_at	Epb4.1l1	4.62542	5.15834	5.93128	5.93269	5.41193	2.05638	0.0233653
1424349_a_at	Lpgat1	7.77862	7.65402	9.04392	8.46878	8.23634	2.05627	0.02723
1460151_at	n.a.*	5.3872	5.99203	6.97022	6.48888	6.20958	2.05614	0.0431714
1451255_at	Lsr	6.07938	6.00183	7.11675	7.04416	6.56053	2.05601	0.00854393
1459632_at	n.a.*	5.08534	5.10582	6.14582	6.12499	5.61549	2.05598	0.00805131
1423059_at	Ptk2	5.60774	5.31541	6.34627	6.65563	5.98126	2.05533	0.0174767
1420104_at	n.a.*	5.35736	5.09034	6.56763	5.95859	5.74348	2.05518	0.0332131
1456292_a_at	Vim	9.41167	9.51896	10.3931	10.6152	9.98474	2.0546	0.0109708
1417866_at	Tnfaip1	5.8247	6.08359	6.75799	7.22679	6.47327	2.05373	0.0236303
1424400_a_at	Aldh1l1	6.5191	6.36033	7.51643	7.43892	6.95869	2.05332	0.00950969
1450448_at	Stc1	4.83479	4.76586	5.65475	6.02138	5.3192	2.05301	0.0152051
1427742_a_at	Klf6	8.16744	7.74269	9.29558	8.69001	8.47393	2.053	0.0401646
1451611_at	Hrasls3	8.60361	8.17703	9.42129	9.43312	8.90876	2.0518	0.0176026
1459888_at	LOC545261	4.89402	4.58244	5.90426	5.64525	5.25649	2.05128	0.0165983
1441917_s_at	Tmem40	4.61399	4.92585	5.87122	5.74099	5.28801	2.0508	0.0138547
1448757_at	Pml	7.32853	7.22679	8.46861	8.15881	7.79568	2.0506	0.0135136
1436029_at	Bicc1	5.59642	5.42806	6.37464	6.72131	6.03011	2.05016	0.015814
1436196_at	C030046G05	6.96955	6.94831	7.75363	8.23406	7.47639	2.04899	0.0206164
1447800_x_at	n.a.*	8.93907	8.9436	9.96799	9.98342	9.45852	2.04822	0.00811403
1448894_at	Akr1b8	5.57486	5.34706	6.54439	6.44619	5.97812	2.04817	0.01111
1420351_at	Tnfrsf4	7.65082	7.59981	8.55472	8.76427	8.1424	2.04795	0.010401
1418551_at	Mybpc3	5.02908	5.03364	6.31891	5.8078	5.54736	2.04484	0.0224489
1436216_s_at	2610204M08Rik	6.72634	6.52992	7.72222	7.59682	7.14383	2.044	0.0108216
1452127_a_at	Ptpn13	6.00548	6.13893	7.0498	7.15619	6.5876	2.04315	0.00958168
1441768_at	9430051O21Rik	5.51013	5.42933	6.69704	6.30377	5.98507	2.04297	0.0166715
1438312_s_at	Ltbp3	6.5223	6.78402	7.83638	7.53041	7.16828	2.04236	0.0167271
1417401_at	Rai14	4.53604	4.43601	5.49361	5.53729	5.00074	2.04121	0.0088109
1442270_at	n.a.*	5.05225	5.32034	6.16507	6.26631	5.70099	2.04117	0.0123798
1458060_at	n.a.*	5.97908	6.04254	6.68418	7.39582	6.5254	2.04088	0.0385421
1417612_at	Ier5	7.58744	7.99783	8.71769	8.92519	8.30704	2.04033	0.0197369
1419307_at	Tnfrsf13c	5.03324	4.95478	6.18892	5.85595	5.50822	2.0398	0.0142769
1421550_a_at	Trim34	7.96868	8.17141	8.9039	9.29287	8.58422	2.03967	0.0185807
1425267_a_at	Pear1	5.7301	6.31906	7.11378	6.99191	6.53871	2.03957	0.0288077
1447284_at	Trem1	5.37669	5.49618	6.483	6.4449	5.95019	2.03851	0.00902023
1438245_at	n.a.*	5.11387	5.60062	6.41152	6.35796	5.87099	2.03848	0.0214697
1451095_at	Asns	5.76018	5.57634	7.02395	6.36753	6.182	2.03845	0.0356307
1448591_at	Ctss	10.9637	10.8561	11.7243	12.1498	11.4235	2.03805	0.0186208
1438072_at	n.a.*	5.32245	5.83148	6.55579	6.65001	6.08993	2.03628	0.0232279
1425584_x_at	n.a.*	5.26149	5.29141	6.57088	6.03177	5.78889	2.03478	0.0247124
1427051_at	Tnks1bp1	5.34221	5.19052	6.37168	6.21005	5.77862	2.03426	0.01075
1435208_at	Dtx3l	9.13965	9.23723	10.0906	10.3323	9.69994	2.03215	0.0117905
1448816_at	Ptgis	5.05923	4.96191	6.36737	5.69784	5.52158	2.03078	0.0356411
1425364_a_at	Slc3a2	9.12152	9.10188	10.1115	10.1545	9.62234	2.02971	0.00846827
1449959_x_at	Lce1h	5.9102	6.00565	7.16236	6.79566	6.46847	2.02944	0.0160932
1446803_at	n.a.*	5.14793	4.94314	6.20705	5.92597	5.55602	2.0293	0.0147954
1425492_at	Bmpr1a	6.67655	6.93123	7.73328	7.91282	7.31347	2.02674	0.013582
1433651_at	Wtip	4.6647	4.83268	5.70424	5.83058	5.25805	2.02612	0.0106758
1454373_x_at	Ubc	6.36454	6.8873	7.46505	7.8238	7.13517	2.02581	0.0322764
1448623_at	Tmem123	9.46799	9.84646	10.4939	10.8568	10.1663	2.02524	0.0240779
1444179_at	A530023O14Rik	4.79098	4.58725	6.06357	5.3499	5.19793	2.02459	0.0423353
1434820_s_at	Pkig	7.35289	6.64634	8.02333	8.01076	7.50833	2.02431	0.038908
1459151_x_at	Ifi35	7.98195	7.88935	8.98252	8.92102	8.44371	2.02248	0.00906245
1420800_a_at	Kcnq2	4.57245	4.72861	5.90216	5.43074	5.15849	2.0222	0.0224415
1423669_at	Col1a1	4.93715	4.34324	5.8214	5.49035	5.14804	2.02185	0.0365019
1439786_at	n.a.*	4.82613	4.99975	5.78987	6.06637	5.42053	2.02116	0.0141741
1423406_at	Sv2a	6.40743	5.90112	7.17923	7.15967	6.66186	2.02115	0.0231398
1422603_at	Rnase4	7.50837	8.09215	8.92291	8.70744	8.30772	2.02079	0.0315575
1426648_at	Mapkapk2	7.49232	7.58119	8.50613	8.59543	8.04377	2.01954	0.00928837
1433776_at	Lhfp	6.22626	6.08979	6.8605	7.48305	6.6649	2.01915	0.0329206
1422869_at	Mertk	6.01004	6.25926	7.03386	7.25964	6.6407	2.01685	0.0146812
1417777_at	Ltb4dh	7.90562	7.49161	8.77385	8.6467	8.20444	2.01623	0.0190749
1424262_at	2810003C17Rik	7.11201	6.95194	8.22472	7.86254	7.5378	2.01622	0.0172458
1426511_at	Susd2	5.11625	5.38061	6.23519	6.28348	5.75388	2.01517	0.0123935
1435526_at	Tor1aip2	7.86859	8.02914	8.69998	9.2181	8.45395	2.01415	0.0259579
1419204_at	Dll1	5.6539	6.19119	6.83828	7.02666	6.42751	2.01381	0.027799
1438796_at	Nr4a3	7.32393	7.31097	8.04298	8.61117	7.82226	2.01339	0.0277647
1428614_at	Ldhd	4.59454	4.78512	5.75142	5.64732	5.1946	2.01327	0.0110371
1456385_x_at	Ubxd3	4.85157	5.1737	5.92798	6.11366	5.51673	2.01138	0.0162688
1440262_at	n.a.*	4.75683	4.85352	5.97841	5.6475	5.30906	2.01081	0.0151666
1425458_a_at	Grb10	5.93025	6.10259	6.95234	7.09523	6.5201	2.01024	0.0112238
1452213_at	Tex2	7.00674	7.06288	7.8067	8.27622	7.53813	2.00924	0.0215832
1420566_at	n.a.*	4.71197	4.3693	5.77941	5.3148	5.04387	2.00898	0.0285797
1422905_s_at	Fmo2	4.74143	4.8604	6.18751	5.42413	5.30337	2.00681	0.046919
1454972_at	Atcay	4.41953	4.7431	5.67967	5.49218	5.08362	2.0064	0.0165059
1435567_at	Phka1	4.4806	4.73129	5.52893	5.69208	5.10822	2.00633	0.0136188
1424885_at	Klhdc8a	5.97936	5.91814	6.73101	7.17424	6.45069	2.00538	0.0203095
1447223_at	n.a.*	5.42896	5.12308	6.04264	6.51547	5.77754	2.00421	0.0278051
1418627_at	Gclm	7.43122	7.02352	8.19674	8.2611	7.72814	2.00216	0.0184816
1443762_s_at	Sbf2	7.48834	7.67004	8.37808	8.78276	8.0798	2.0017	0.020204
1417749_a_at	Tjp1	6.47155	7.1985	7.71015	7.96168	7.33547	2.00123	0.0470047
1451478_at	Angptl7	5.2609	5.32208	6.31204	6.27232	5.79184	2.00096	0.00906245
1434089_at	Synpo	5.10252	5.33278	6.06419	6.37192	5.71785	2.00057	0.0171797
1422404_x_at	Ifna1	4.69574	4.34324	5.60062	5.43818	5.01944	1.99987	0.0173896
1448472_at	Vars	8.09268	7.68812	8.85668	8.92204	8.38988	1.99856	0.0184765
1426555_at	Scpep1	7.44833	7.32333	8.55236	8.2159	7.88498	1.99764	0.0161068
1435735_x_at	H47	7.9079	7.71504	8.82509	8.79442	8.31061	1.99763	0.0108437
1421156_a_at	Dsc2	5.3502	5.33139	6.26601	6.41137	5.83974	1.99708	0.0100083
1457058_at	Adamts2	5.91508	5.52893	6.84599	6.58971	6.21993	1.99425	0.0216096
1449175_at	Gpr65	7.01634	7.32909	7.96625	8.36953	7.6703	1.99333	0.0245529
1440948_at	n.a.*	4.57509	4.76406	5.86642	5.4627	5.16707	1.99306	0.0206518
1427502_at	Adam4	6.25186	6.50857	7.34885	7.40135	6.87766	1.99292	0.0126876
1419697_at	Cxcl11	6.029	5.38683	6.86092	6.54429	6.20526	1.99265	0.0420128
1460569_x_at	Cldn3	5.36693	4.95257	6.08165	6.22667	5.65696	1.99227	0.0203268
1420342_at	Gdap10	7.77118	8.24468	8.92854	9.07534	8.50493	1.99171	0.023644
1457103_at	AU046084	4.87551	4.33443	5.54008	5.65756	5.1019	1.9915	0.0277651
1424720_at	Mgat4b	7.03822	7.60823	8.38715	8.24653	7.82003	1.99117	0.030271
1424114_s_at	Lamb1-1	7.28113	7.2141	8.05998	8.42223	7.74436	1.99099	0.0167015
1448436_a_at	Irf1	9.05674	9.31694	10.1067	10.2528	9.6833	1.99022	0.0139347
1422887_a_at	Ctbp2	5.68113	5.98223	6.67575	6.97256	6.32792	1.98959	0.0195098
1453672_at	2810038L03Rik	4.54152	4.77993	5.73661	5.56884	5.15672	1.98893	0.0137464
1430802_at	H2-Q8	6.26824	6.08674	7.34358	6.99472	6.67332	1.98847	0.017981
1417839_at	Cldn5	5.72143	5.93758	7.09672	6.54336	6.32477	1.98692	0.0310917
1423259_at	Id4	5.53097	5.69704	6.31945	6.88922	6.10917	1.98665	0.0310364
1421344_a_at	Jub	6.47863	6.38342	7.253	7.58923	6.92607	1.98631	0.0160932
1452803_at	Glipr2	5.92626	5.99868	6.92824	6.97667	6.45747	1.98616	0.00942458
1418090_at	Plvap	5.94506	6.22575	7.11004	7.04057	6.58035	1.98605	0.0137464
1437486_at	Gprc5a	5.82345	5.5102	6.5975	6.7145	6.16141	1.98505	0.0154773
1419589_at	Cd93	5.38951	5.52359	6.39347	6.49352	5.95002	1.98199	0.0106078
1437670_x_at	Cd151	7.54429	7.27423	8.34374	8.44796	7.90256	1.98149	0.0138424
1460681_at	Ceacam1	6.22876	6.62888	7.33256	7.49752	6.92193	1.98099	0.02039
1419182_at	Svep1	5.29791	5.39443	6.43549	6.22912	5.83924	1.98087	0.0119503
1418518_at	Furin	6.11988	6.20682	7.28684	7.01146	6.65625	1.98041	0.0138424
1451601_a_at	Spns2	5.25741	5.61565	6.31837	6.52585	5.92932	1.98011	0.0193486
1434010_at	Als2cr13	7.0732	7.35888	7.91002	8.49064	7.70818	1.97833	0.0363302
1417843_s_at	Eps8l2	5.75027	6.13694	6.72571	7.1298	6.43568	1.97815	0.0287406
1430567_at	Spink5	4.54919	4.4992	5.25793	5.75871	5.01626	1.97812	0.0247688
1457231_at	n.a.*	6.64448	7.20334	7.83156	7.98322	7.41565	1.97723	0.0304183
1444765_at	Rbpms	4.95498	5.08378	5.83559	6.17011	5.51112	1.97722	0.0166766
1443816_s_at	BB220380	6.46637	6.58456	7.58771	7.42934	7.017	1.97666	0.011291
1419530_at	Il12b	5.24154	4.79858	5.83971	6.16644	5.51157	1.97659	0.0282348
1440693_at	Palld	4.85079	4.35019	5.52916	5.63676	5.09173	1.97585	0.0255768
1416531_at	Gsto1	7.94593	7.86009	8.75405	9.01591	8.39399	1.97516	0.0136139
1459961_a_at	Stat3	7.29408	7.74579	8.39202	8.61117	8.01076	1.97473	0.0248595
1443937_at	AI790276	6.77609	7.02507	7.76469	7.9983	7.39104	1.97371	0.0160932
1429543_at	6230424C14Rik	5.35555	5.48396	6.38807	6.41313	5.91018	1.97362	0.0101914
1438165_x_at	Vat1	6.00558	5.59342	7.07259	6.48258	6.28854	1.96985	0.0442073
1456085_x_at	Cd151	8.21952	7.88646	8.84025	9.22188	8.54203	1.96984	0.0254977
1456795_at	D330027G24Rik	5.09186	5.25069	6.11057	6.18795	5.66027	1.96971	0.0110209
1449875_s_at	H2-T10	10.1228	10.0509	11.0534	11.0759	10.5757	1.96942	0.00959376
1451961_a_at	Mbp	4.6994	4.74641	6.06376	5.33636	5.21148	1.96858	0.0452919
1423628_s_at	Pcdhga1	6.73332	6.70284	8.03351	7.35606	7.20644	1.96797	0.0400908
1436177_at	n.a.*	7.44921	7.30674	8.24217	8.46515	7.86582	1.96657	0.013454
1421930_at	Icos	7.26303	7.33293	8.38617	8.16056	7.78567	1.96617	0.0125596
1446645_at	A730037C10Rik	4.6326	4.75692	5.93637	5.40382	5.18243	1.9661	0.0285078
1439398_x_at	Nelf	6.0855	5.95077	6.9864	6.99959	6.50557	1.96545	0.01041
1419488_at	Tnip2	5.80215	6.02327	6.87997	6.89272	6.39953	1.96378	0.0121998
1419301_at	Fzd4	5.06834	5.07328	6.10589	5.98207	5.55739	1.96315	0.010286
1444273_at	AW555355	6.66013	7.17182	7.80577	7.97227	7.4025	1.96298	0.0280063
1435444_at	Atf6	5.85059	5.87803	6.70913	6.96496	6.35068	1.96255	0.0133085
1441503_at	Dcdc2a	4.60052	4.46527	5.7207	5.29042	5.01923	1.96246	0.0220354
1435456_at	Ttc28	6.1996	6.24791	7.41403	6.97773	6.70982	1.96173	0.0214657
1455015_at	Tbc1d9	5.55807	5.43781	6.16649	6.77321	5.9839	1.96143	0.034692
1450138_a_at	Serpinb6a	9.25248	8.9976	9.96377	10.2261	9.60999	1.95871	0.0176353
1417969_at	Fbxo31	6.27356	6.32608	7.58489	6.95381	6.78459	1.9582	0.0363823
1430735_at	Patl2	5.32783	4.89563	6.02236	6.13968	5.59638	1.95788	0.0220354
1449473_s_at	Cd40	6.87919	7.13419	8.01671	7.93512	7.4913	1.95779	0.0137464
1431399_at	Adamts9	5.23744	5.35253	6.25406	6.27419	5.77956	1.95767	0.0102989
1419849_at	n.a.*	4.87797	4.6335	5.74945	5.69837	5.23982	1.95636	0.0132161
1435975_at	Dennd4a	6.09531	6.2118	6.89711	7.34467	6.63722	1.95522	0.0231369
1436068_at	Zbtb10	5.31346	5.23228	6.14327	6.33697	5.75649	1.9551	0.0121046
1432184_a_at	2610204M08Rik	5.76689	5.48999	6.56856	6.62115	6.11165	1.95398	0.0143072
1449514_at	Grk5	5.92765	6.05604	6.92824	6.9869	6.47471	1.95305	0.0107337
1454781_x_at	Commd9	6.48998	6.43572	7.41344	7.44353	6.94567	1.95293	0.00982611
1418710_at	Cd59a	5.79565	6.08817	7.12902	6.68589	6.42468	1.9528	0.0280074
1453083_at	Vmn2r29	5.04215	4.79328	5.70337	6.06288	5.40042	1.95262	0.0217257
1444019_at	Lrrc19	4.88044	4.89827	6.00832	5.70072	5.37194	1.95229	0.0153731
1447772_at	Plekha3	4.65388	4.83629	5.76639	5.65036	5.22673	1.94975	0.0124106
1430752_at	C330006D17Rik	8.03283	8.14759	9.13444	8.97156	8.57161	1.94908	0.0119497
1460603_at	Samd9l	8.84962	9.36795	10.1312	10.0113	9.59001	1.94861	0.0283356
1448291_at	Mmp9	5.81641	6.02626	6.7864	6.97899	6.40201	1.94715	0.0146505
1427610_at	Dsp	4.55895	4.53847	5.25737	5.76255	5.02933	1.947	0.0265691
1417822_at	D17H6S56E-5	10.0357	9.61532	10.6841	10.8893	10.3061	1.94687	0.0238376
1451313_a_at	1110067D22Rik	4.97166	5.05543	5.98795	5.96056	5.4939	1.94626	0.0101907
1424318_at	1110067D22Rik	6.20133	6.33795	7.22609	7.23445	6.74995	1.94616	0.0107702
1448577_x_at	Syngr2	8.54077	8.50199	9.50257	9.4614	9.00168	1.94612	0.00991215
1449141_at	Fblim1	5.18087	5.17268	6.23035	6.04332	5.65681	1.94539	0.0117944
1422231_a_at	Tnfrsf25	5.71928	5.90051	6.79669	6.74279	6.28982	1.9451	0.0118173
1458997_at	A230106M20Rik	4.89847	4.92334	5.9719	5.76873	5.39061	1.94451	0.0122259
1433034_at	2310007H11Rik	4.90752	5.21999	5.99375	6.05256	5.54346	1.9445	0.0160439
1417222_a_at	Tmem123	8.85396	9.19214	9.8191	10.1437	9.50221	1.94305	0.0240688
1436363_a_at	Nfix	6.85812	7.0469	7.79029	8.03066	7.43149	1.94257	0.0155805
1429764_at	1500005K14Rik	6.2251	6.06747	7.10739	7.10007	6.62501	1.94187	0.0112235
1452878_at	Prkce	5.83161	6.05427	6.82387	6.97592	6.42142	1.94122	0.014236
1428655_at	Ccdc128	8.82126	9.04606	9.65943	10.1194	9.41154	1.9396	0.0274029
1415857_at	Emb	10.1809	10.2416	10.9921	11.3411	10.6889	1.9391	0.0177728
1436012_s_at	Scrn2	6.69893	6.88313	7.8997	7.59088	7.26816	1.93759	0.0180883
1418655_at	B4galnt1	7.99191	7.90261	8.82088	8.98154	8.42423	1.93717	0.0118737
1447676_x_at	S100a16	8.27185	7.76351	9.02231	8.92088	8.49464	1.93712	0.0279046
1417821_at	D17H6S56E-5	9.36197	8.7143	9.90174	10.0817	9.51492	1.93666	0.0418235
1422470_at	Bnip3	7.95151	8.22021	9.20091	8.87726	8.56247	1.93619	0.0214413
1431359_a_at	1110007C09Rik	6.15808	5.71992	6.93864	6.84552	6.41554	1.936	0.0230726
1425902_a_at	Nfkb2	6.98913	7.0532	8.01172	7.93595	7.4975	1.93545	0.0105117
1449198_a_at	St3gal5	6.1942	6.00394	7.35171	6.75168	6.57538	1.93539	0.0376064
1425729_at	Best2	4.71089	4.78377	5.98477	5.41489	5.22358	1.93522	0.0325903
1420875_at	Twf1	8.53677	8.71377	9.24495	9.91028	9.10144	1.93501	0.0436884
1428650_at	Tns1	7.35076	7.98733	8.69807	8.5437	8.14497	1.93434	0.0402931
1429352_at	Mocos	6.37475	6.26513	7.10677	7.4359	6.79564	1.93374	0.0175985
1437724_x_at	Pitpnm1	8.29985	8.60655	9.24507	9.56405	8.92888	1.93369	0.0228122
1437615_s_at	Vps37c	7.44936	7.56416	8.22934	8.68597	7.98221	1.93308	0.0247115
1418097_a_at	Crlf2	8.18135	8.12114	9.0067	9.1967	8.62647	1.93249	0.0123935
1423091_a_at	Gpm6b	4.48682	4.6763	5.62318	5.44051	5.0567	1.93225	0.0142677
1420583_a_at	Rora	5.76873	6.19389	6.95199	6.91037	6.45624	1.9317	0.0219315
1425268_a_at	Pear1	5.08917	4.92287	6.06327	5.84804	5.48084	1.93138	0.0146445
1424162_at	Trim29	7.12398	7.16607	7.96395	8.22444	7.61961	1.93076	0.0143403
1432098_a_at	Olfr701	4.70263	5.07582	5.82796	5.84875	5.36379	1.93071	0.0190473
1443798_at	Pik3cd	7.93337	7.74173	9.01804	8.55465	8.31195	1.93026	0.027132
1444895_at	n.a.*	4.61543	5.06971	5.89322	5.68937	5.31693	1.93017	0.0269054
1454942_at	Niban	6.98812	7.11351	7.81253	8.18542	7.52489	1.92941	0.0201948
1428822_a_at	Snx24	5.26128	5.27977	6.22608	6.21096	5.74452	1.92918	0.0101002
1427021_s_at	Fth1	11.9393	12.0971	12.98	12.9523	12.4922	1.92911	0.0115832
1441414_at	Sfi1	6.48048	6.87472	7.77749	7.47293	7.15141	1.92867	0.0270065
1437494_at	Mapkapk3	7.41876	7.5245	8.23544	8.60113	7.94496	1.9274	0.0195737
1452217_at	Ahnak	8.45757	8.76397	9.35241	9.76244	9.0841	1.92739	0.0279227
1445394_at	n.a.*	4.58664	4.64827	5.68331	5.44137	5.0899	1.92503	0.014037
1448306_at	Nfkbia	10.5587	10.7916	11.6733	11.5665	11.1475	1.92492	0.0142387
1449731_s_at	Nfkbia	10.572	10.45	11.3671	11.544	10.9833	1.92456	0.0130258
1432324_at	4930432J09Rik	5.05052	4.85079	5.89698	5.89312	5.42285	1.92438	0.0126011
1459893_at	C76472	5.12813	5.19944	6.29037	5.92512	5.63576	1.9238	0.0192213
1424374_at	Gimap4	9.0299	9.46573	10.1218	10.2616	9.71977	1.92374	0.0242443
1454755_at	Itpkc	6.23798	6.41387	7.17855	7.36078	6.79779	1.9235	0.0141981
1416236_a_at	Mpzl2	6.69194	6.89576	7.55064	7.92308	7.26535	1.92254	0.0221627
1439521_at	n.a.*	4.82093	4.9485	6.00767	5.64768	5.3562	1.92248	0.0198345
1451599_at	Sesn2	6.3979	6.53486	7.45092	7.36715	6.93771	1.92207	0.0117782
1425132_at	Neto1	4.99723	4.95755	5.97249	5.86692	5.44855	1.9216	0.0109308
1460466_at	1700047I17Rik1	7.73973	7.24989	8.44584	8.42823	7.96592	1.92149	0.0267886
1419295_at	Creb3l1	4.56798	4.6145	5.71633	5.35015	5.06224	1.92119	0.0191575
1451037_at	Ptpn9	6.79013	6.87787	7.63675	7.91512	7.30497	1.92111	0.0156987
1420379_at	Slco1a1	4.96749	5.41013	6.09191	6.16887	5.6596	1.92064	0.0238565
1421947_at	Gng12	7.07521	6.99895	7.87073	8.08648	7.50784	1.92056	0.013582
1418365_at	Ctsh	8.27631	8.19989	8.92023	9.43859	8.70875	1.92027	0.029222
1449049_at	Tlr1	5.18048	5.40563	5.94262	6.52607	5.7637	1.92024	0.0383678
1416601_a_at	Rcan1	4.65986	4.70839	5.59165	5.65891	5.1547	1.92006	0.010638
1433489_s_at	Fgfr2	6.78336	6.85369	7.5791	7.94025	7.2891	1.92005	0.0191506
1456464_x_at	Syt11	4.99919	4.98361	5.95398	5.91079	5.46189	1.91984	0.0103735
1455176_a_at	Syt11	4.41029	4.72162	5.34212	5.6712	5.03631	1.91946	0.0241492
1430163_at	Rab43	5.58014	5.72639	6.61337	6.57437	6.12356	1.91933	0.0116277
1417301_at	Fzd6	7.04588	7.11045	7.68074	8.35574	7.5482	1.91863	0.0439514
1421993_a_at	Tmem134	5.8247	5.63876	6.69194	6.65166	6.20177	1.91862	0.0124949
1452915_at	Prkar2a	7.0904	7.23388	8.16786	8.03647	7.63215	1.91856	0.0126125
1433558_at	Dab2ip	5.96446	6.16922	6.91467	7.09892	6.53682	1.91847	0.0151381
1457342_at	Ikzf4	5.48015	5.74118	6.26504	6.83612	6.08062	1.91841	0.0387957
1420131_s_at	Pttg1ip	9.20361	9.43577	10.0805	10.4386	9.78962	1.91836	0.0225011
1448620_at	Fcgr3	7.2478	7.68572	8.46081	8.35171	7.93651	1.91786	0.0241072
1435792_at	Csprs	5.77258	5.75008	6.77819	6.62316	6.231	1.91765	0.0117905
1425511_at	Mark1	5.46676	5.6692	6.43786	6.57639	6.03755	1.9174	0.0141234
1436199_at	Trim14	7.39833	7.36448	8.24167	8.39908	7.85089	1.91716	0.0118659
1424700_at	Tmem38b	7.06489	7.30386	8.25537	7.99105	7.6538	1.91698	0.0186287
1426894_s_at	C230093N12Rik	7.87572	8.21068	8.80947	9.15302	8.51222	1.91593	0.0263665
1420502_at	Sat1	9.42846	9.55144	10.0934	10.7619	9.9588	1.91548	0.0444329
1449152_at	Cdkn2b	6.00547	5.75687	6.68707	6.94945	6.34972	1.91466	0.0190262
1458527_at	n.a.*	5.03842	5.58779	6.2891	6.2094	5.78118	1.91341	0.0323359
1455263_at	9030625A04Rik	6.41889	6.47662	7.15717	7.61014	6.91571	1.91309	0.0247124
1421884_at	Sos1	6.3801	6.33727	6.95256	7.63416	6.82602	1.91146	0.0451274
1455683_a_at	Tbc1d8	5.54966	5.42859	6.24376	6.60378	5.95644	1.91142	0.0201811
1426906_at	Ifi203	9.93766	10.4031	10.9983	11.2104	10.6374	1.9105	0.0287921
1457379_at	C78549	5.39047	5.35788	6.48019	6.13554	5.84102	1.91016	0.0184389
1439528_at	4833423E24Rik	5.30349	5.52745	6.21434	6.48299	5.88207	1.9095	0.0186144
1418004_a_at	Tmem176b	9.86171	9.94963	10.8338	10.8437	10.3722	1.90937	0.010901
1418895_at	Skap2	8.15629	8.2688	8.99642	9.29397	8.67887	1.90877	0.0171802
1417523_at	Plek	5.37669	5.48415	6.29653	6.4293	5.89667	1.90857	0.0123189
1418158_at	Trp63	7.20879	7.22153	7.95009	8.34475	7.68129	1.90826	0.0211262
1447016_at	Tbc1d1	6.57208	6.58268	7.5134	7.5053	7.04337	1.90788	0.0104883
1443536_at	Slc7a11	6.76534	6.6861	7.80021	7.51507	7.19168	1.90781	0.0162516
1434754_at	Garnl4	5.33177	5.22097	6.16641	6.2489	5.74201	1.90697	0.0116865
1433883_at	Tpm4	9.60509	9.73987	10.532	10.6753	10.1381	1.90681	0.0130097
1444412_at	n.a.*	5.4961	5.64806	6.39354	6.61233	6.03751	1.9064	0.0151724
1426367_at	Cab39l	6.95295	6.87726	7.78206	7.90938	7.38041	1.90609	0.0118682
1417190_at	Pbef1	7.8321	8.08839	8.94076	8.84042	8.42542	1.90573	0.0155464
1443736_at	n.a.*	4.90179	5.1504	6.02025	5.89235	5.4912	1.90554	0.0157088
1437165_a_at	Pcolce	5.68331	5.81192	6.71125	6.64365	6.21253	1.90506	0.0118495
1416085_s_at	Zfand5	9.8233	9.64257	10.6467	10.6786	10.1978	1.90495	0.0126876
1420710_at	Rel	5.29275	5.30364	6.23908	6.21583	5.76283	1.90429	0.0105808
1418637_at	Etv3	8.15998	8.43003	8.93226	9.51562	8.75947	1.90387	0.0414134
1449677_s_at	Tmem38b	5.26859	5.46537	6.33914	6.25149	5.83115	1.90308	0.0136356
1430521_s_at	Cpne8	5.21042	5.04472	6.24226	5.86929	5.59167	1.9029	0.0220294
1456603_at	1500005K14Rik	6.89636	6.73841	7.41021	8.07969	7.28117	1.90206	0.0465286
1433123_at	2900069G24Rik	6.31641	6.14316	7.42943	6.88474	6.69344	1.90171	0.0344769
1424220_a_at	Porcn	4.93715	5.08938	6.13616	5.74267	5.47634	1.9002	0.0230754
1446880_at	n.a.*	4.69684	4.89906	5.84544	5.60228	5.26091	1.89988	0.0174206
1449289_a_at	B2m	12.2614	12.5176	13.1801	13.4497	12.8522	1.89926	0.0202593
1416419_s_at	Gabarapl1	7.94848	8.21374	8.88984	9.12272	8.54369	1.89892	0.0192021
1446643_at	5330409N07Rik	4.68724	4.73075	5.92895	5.33795	5.17122	1.89797	0.0367608
1427943_at	Acyp2	5.66373	6.10672	6.84602	6.77236	6.34721	1.89732	0.0250695
1426440_at	Dhrs7	7.15937	7.39278	8.2611	8.13719	7.73761	1.89615	0.0154273
1418854_at	Birc2	8.96733	9.38423	9.93706	10.2598	9.6371	1.89559	0.0310216
1458180_at	n.a.*	6.20865	5.95049	6.94628	7.05774	6.54079	1.89532	0.0160932
1428926_at	1110003O08Rik	6.41889	6.55492	7.58661	7.2316	6.94801	1.895	0.0209132
1424099_at	2310016C16Rik	6.18083	6.04114	7.05327	7.0124	6.57191	1.89454	0.012127
1428418_s_at	3110050N22Rik	6.23299	6.44097	7.2875	7.22958	6.79776	1.89416	0.0138424
1423771_at	Prkcdbp	5.22897	4.87511	6.14766	5.79896	5.51268	1.89379	0.028649
1459843_s_at	Smad1	8.18433	8.34343	9.10895	9.26075	8.72437	1.89339	0.0140052
1416297_s_at	Pap	4.94762	4.73104	5.55072	5.9697	5.29977	1.89327	0.0269752
1419858_at	n.a.*	6.30128	6.1304	7.18398	7.08861	6.67607	1.89271	0.0133615
1449556_at	C920025E04Rik	10.9169	10.7297	11.7419	11.7454	11.2835	1.89261	0.0131239
1417817_a_at	Wwtr1	5.69748	5.87688	6.74813	6.66604	6.24713	1.89199	0.0134455
1426972_at	Sec24d	7.09612	6.84839	7.7542	8.0294	7.43203	1.89152	0.0205103
1437155_a_at	Wwtr1	4.5804	4.73393	5.4971	5.65564	5.11677	1.89108	0.0141047
1422885_at	Snrpd3	5.50887	5.25874	6.5182	6.08777	5.8434	1.89103	0.0288431
1439292_at	n.a.*	4.89589	4.92169	5.90489	5.75025	5.36818	1.89051	0.012456
1427076_at	Mpeg1	9.5127	9.66622	10.2791	10.7371	10.0488	1.8903	0.027866
1440387_at	6820431F20Rik	5.89108	5.90067	6.9459	6.68268	6.35508	1.89004	0.0155964
1432441_at	4933413J09Rik	5.91482	5.72393	6.84013	6.63535	6.27856	1.88997	0.0162096
1418691_at	Rgs9	6.67668	6.70332	7.72966	7.48674	7.1491	1.88976	0.0148806
1429005_at	Mfhas1	8.43526	8.27612	9.01751	9.53003	8.81473	1.8896	0.0323102
1459145_at	A930033H14Rik	5.05242	4.77993	6.01086	5.65612	5.37483	1.8886	0.0254596
1417014_at	Hspb8	5.98871	5.69379	6.66757	6.84927	6.29983	1.88841	0.0193077
1426615_s_at	Ndrg4	4.86666	5.06336	5.64128	6.12251	5.42345	1.88804	0.0308994
1447821_at	1700051K22Rik	7.30269	6.91089	8.28499	7.7615	7.56502	1.88747	0.0440113
1423396_at	Agt	5.27794	4.99529	6.23068	5.87441	5.59458	1.88679	0.0261039
1428902_at	Chst11	6.94342	6.94047	7.75791	7.955	7.3992	1.88492	0.0136356
1419814_s_at	S100a1	7.97607	7.8133	8.97919	8.63914	8.35193	1.88489	0.0211262
1438118_x_at	Vim	10.1868	10.4152	11.1292	11.3017	10.7582	1.88481	0.0166208
1433041_at	Rabepk	4.95728	5.14	5.97514	5.95075	5.50579	1.88466	0.0132871
1427910_at	Cst6	6.03751	5.70475	6.93487	6.63551	6.32816	1.88435	0.0257243
1428861_at	4631422O05Rik	6.58808	6.81478	7.33631	7.89452	7.15842	1.88424	0.0389247
1456036_x_at	Gsto1	7.68502	7.79954	8.53696	8.77522	8.19919	1.88402	0.0158446
1428785_at	Amotl1	7.16839	7.59523	8.34275	8.24845	7.83871	1.884	0.0249021
1455064_at	Rab36	5.58012	5.64247	6.7649	6.28323	6.06768	1.88266	0.028488
1453132_a_at	Gkn2	4.93688	4.79052	5.96503	5.58636	5.31969	1.88165	0.0229721
1425119_at	Oas1b	6.93521	7.20077	7.8897	8.06963	7.52383	1.88123	0.018342
1422999_at	Map3k14	6.22611	6.55152	7.33917	7.26164	6.84461	1.88112	0.0189782
1435458_at	Pim1	8.57098	8.40366	9.29037	9.50239	8.94185	1.87783	0.0162281
1420172_at	n.a.*	10.2062	10.0496	11.0295	11.0441	10.5823	1.87755	0.0128281
1438861_at	Bnc2	5.37945	5.24222	6.30175	6.13716	5.76515	1.87725	0.0142974
1444683_at	n.a.*	5.34511	5.48489	6.6274	6.01813	5.86889	1.87614	0.0418891
1444203_at	n.a.*	5.92354	5.88449	6.88065	6.74191	6.35765	1.87549	0.0126011
1422904_at	Fmo2	6.46184	6.25228	7.52881	6.99891	6.81046	1.87488	0.0363823
1419429_at	Cntfr	5.03321	5.47534	6.40037	5.92117	5.70752	1.87448	0.0450398
1450333_a_at	Gata2	4.98226	5.16477	6.06466	5.89535	5.52676	1.87448	0.0155825
1419551_s_at	Stk39	5.45284	5.85511	6.27758	6.84285	6.10709	1.87415	0.0499332
1424894_at	Rab13	5.07515	5.16265	6.08603	5.9632	5.57176	1.87348	0.01279
1460345_at	2610208M17Rik	6.54612	6.07223	7.10136	7.3278	6.76188	1.87307	0.0324179
1416939_at	Ppa1	8.98823	8.42269	9.56024	9.66063	9.15795	1.87252	0.0369363
1459947_at	n.a.*	5.48127	5.83096	6.60527	6.51649	6.1085	1.87224	0.0208051
1431595_at	2900064B16Rik	4.69435	4.69435	5.82736	5.37024	5.14658	1.87183	0.0271008
1424032_at	Hvcn1	7.56254	7.48233	8.30247	8.55099	7.97458	1.87163	0.0161059
1459866_x_at	Cyfip1	8.71678	8.54494	9.43373	9.63631	9.08294	1.87146	0.0162691
1457237_at	Mbnl2	4.95557	5.02991	5.88373	5.90865	5.44446	1.87054	0.0117251
1428622_at	Depdc6	5.5092	6.03288	6.76541	6.58354	6.22276	1.87051	0.0351848
1446732_at	n.a.*	4.3759	4.77193	5.56261	5.39164	5.02552	1.87022	0.0253095
1425760_a_at	Pitpnm1	7.46612	7.48035	8.22401	8.52801	7.92462	1.86966	0.0179908
1416901_at	Npc2	10.8712	11.0345	11.7633	11.947	11.404	1.86907	0.0156453
1423812_s_at	AW146242	7.3789	7.34266	7.96037	8.5658	7.81193	1.86905	0.0405778
1447607_at	n.a.*	5.84389	6.05559	7.03553	6.66704	6.40051	1.86807	0.0249124
1416383_a_at	Pcx	6.42476	6.86607	7.58832	7.50542	7.09614	1.86795	0.02672
1429292_a_at	2310046K01Rik	5.32381	5.23347	6.10552	6.25465	5.72936	1.86793	0.013568
1420378_at	Sftpd	4.88564	5.16991	5.81161	6.04649	5.47841	1.86771	0.0214413
1435069_at	BC064078	5.80542	5.71805	6.37192	6.95389	6.21232	1.86758	0.0388596
1432060_at	Iqca	4.76736	4.85279	5.48415	5.93827	5.26064	1.86753	0.0276284
1436061_at	n.a.*	7.73797	7.9726	8.52615	8.98624	8.30574	1.86725	0.0320581
1423467_at	Ms4a4b	9.79232	9.74929	10.6362	10.707	10.2212	1.8671	0.0118384
1443361_at	n.a.*	5.26233	5.85454	6.43279	6.48435	6.0085	1.86625	0.0395831
1417492_at	Ctsb	6.54039	6.92756	7.38689	7.88121	7.18401	1.86616	0.0430808
1421322_a_at	Irf9	7.38801	7.81758	8.26814	8.73743	8.05279	1.86605	0.0440023
1430599_at	Myt1l	4.88906	4.90542	5.86608	5.72695	5.34688	1.86513	0.0128014
1426464_at	Nr1d1	5.09744	4.94839	5.9261	5.91779	5.47243	1.86481	0.0130258
1422140_at	EG665378	4.98882	4.66383	5.76444	5.68527	5.27559	1.86417	0.0197369
1443157_at	n.a.*	4.544	4.88306	5.56173	5.66159	5.1626	1.86365	0.0207803
1427234_at	LOC100046586	6.51942	6.81982	7.67468	7.45975	7.11842	1.86296	0.0216876
1460380_at	Dsg2	5.76995	5.58254	6.57029	6.57601	6.1247	1.86207	0.0140057
1416854_at	Slc34a2	5.23005	5.35727	6.11037	6.26985	5.74189	1.86149	0.0145008
1423726_at	Vat1	6.16397	6.1205	6.83777	7.23941	6.59041	1.86136	0.0238376
1434235_at	Slc20a2	6.4435	6.32146	7.30291	7.25462	6.83062	1.86127	0.0127375
1416895_at	Efna1	4.71581	4.79866	5.65491	5.65186	5.20531	1.8611	0.0119658
1428433_at	Hipk2	7.5154	7.84417	8.31314	8.83861	8.12783	1.86101	0.0426837
1438370_x_at	Dos	5.80406	6.0134	6.65272	6.95676	6.35674	1.86091	0.0217348
1417815_a_at	Serinc3	10.2122	10.5729	11.184	11.3932	10.8406	1.8609	0.0247234
1423021_s_at	Jak3	7.42325	7.64962	8.35477	8.50907	7.98418	1.86024	0.017002
1448508_at	Traf3ip2	6.73009	6.49494	7.4738	7.5421	7.06023	1.86018	0.0159224
1431806_at	4931408D14Rik	4.92278	4.77736	5.90063	5.59026	5.29776	1.86009	0.0203684
1455826_a_at	Bace1	5.70304	6.3031	6.95009	6.84557	6.45045	1.8593	0.0416186
1426245_s_at	Mapre2	7.10566	6.80142	7.81323	7.88288	7.4008	1.85899	0.0187497
1420832_at	Qsox1	5.85715	5.91337	6.9154	6.64374	6.33242	1.85871	0.0172381
1448233_at	Prnp	9.38838	9.26139	10.0092	10.429	9.77201	1.85864	0.0265169
1435542_s_at	Cttnbp2nl	6.93224	6.99845	7.58156	8.13732	7.4124	1.85844	0.0366251
1434153_at	Shb	5.89108	5.86832	6.58965	6.95756	6.32665	1.8582	0.0218156
1458567_at	D130017N08Rik	4.97475	5.16265	6.11676	5.80658	5.51518	1.857	0.0215808
1441996_at	9530082P21Rik	6.24049	6.22369	7.29128	6.95756	6.67825	1.85617	0.02006
1433920_at	Sema4c	5.73641	5.95171	6.74784	6.72417	6.29003	1.85568	0.015103
1434112_at	Lphn2	5.57702	5.71085	6.54378	6.52767	6.08983	1.85548	0.0130001
1450241_a_at	Evi2a	6.87684	6.95756	7.55825	8.05956	7.36305	1.85537	0.0321241
1455143_at	Nlgn2	6.04479	6.06035	7.03616	6.85171	6.49825	1.85493	0.0141516
1443814_x_at	Ctsh	7.65947	7.50576	8.25424	8.6932	8.02817	1.85459	0.0285797
1449334_at	Timp3	5.89108	5.84284	6.625	6.88922	6.31204	1.85337	0.0170578
1445601_at	n.a.*	5.12467	5.02817	6.14066	5.79174	5.52131	1.85289	0.0217257
1442229_at	Pax9	4.66876	4.78933	5.71754	5.52009	5.17393	1.85289	0.0156987
1442640_at	n.a.*	5.75685	6.11771	6.84974	6.80323	6.38188	1.85216	0.0218193
1426335_at	Kcnq2	5.95289	5.55866	6.81822	6.47142	6.2003	1.85195	0.033848
1439830_at	LOC675366	7.0569	7.16981	7.71155	8.29319	7.55786	1.85191	0.0405778
1448892_at	Dock7	6.61589	6.58622	7.29141	7.68848	7.0455	1.85175	0.0239518
1457009_at	Rhobtb3	4.82745	4.34534	5.66312	5.2869	5.0307	1.8514	0.0426525
1452784_at	Itgav	8.50552	8.56001	9.23786	9.60382	8.9768	1.8507	0.0222155
1450424_a_at	Il18bp	6.91037	6.85509	7.57976	7.96168	7.32672	1.8506	0.0232574
1432103_a_at	Sh3gl3	5.21878	5.20123	6.21817	5.97772	5.65397	1.85053	0.0160932
1438702_at	Flrt2	4.92695	4.79324	6.00002	5.4955	5.30393	1.85018	0.0336933
1434813_x_at	Wars	7.46316	7.33603	8.3149	8.25938	7.84337	1.85002	0.0132188
1422738_at	Ddr2	5.04487	5.12034	6.05356	5.88669	5.52636	1.84999	0.0142423
1425182_x_at	Klk1b22	5.24591	5.08087	6.17528	5.92626	5.60708	1.84982	0.0184968
1424150_at	Gdpd5	5.90915	5.83696	6.90736	6.61225	6.31643	1.84901	0.0187636
1418014_a_at	B4galt1	8.15512	8.01791	8.78283	9.16274	8.52965	1.84839	0.0245125
1416842_at	Gstm5	4.93958	4.56178	5.77828	5.49555	5.1938	1.84835	0.0294652
1451701_x_at	Cldn3	4.53462	4.82148	5.63794	5.49025	5.12107	1.84811	0.0198114
1425553_s_at	Hip1r	6.62669	6.54397	7.61758	7.32465	7.02822	1.84777	0.0188592
1443636_at	n.a.*	7.04318	7.08157	8.21497	7.68085	7.50514	1.84745	0.0351526
1440733_at	LOC100049166	4.98739	4.84252	5.91725	5.68019	5.35684	1.84518	0.0177631
1418244_at	Nat5	8.15466	8.09955	9.03215	8.9887	8.56877	1.84461	0.0123267
1417552_at	Fap	5.61425	5.3055	6.31522	6.37107	5.90151	1.84455	0.0195207
1422728_at	Inha	4.61667	4.97902	5.5876	5.77455	5.23946	1.8445	0.0250606
1439765_x_at	Krt42	8.20556	8.24006	9.26384	8.94819	8.66441	1.84447	0.0197167
1418280_at	Klf6	5.63223	5.8424	6.48895	6.75157	6.17879	1.84414	0.0207473
1434005_at	Rbms1	9.2332	9.06278	9.83047	10.2311	9.58939	1.84396	0.0271314
1424919_at	Erbb2	5.0031	4.742	5.96647	5.54317	5.31368	1.84327	0.0320639
1433270_at	9530004M16Rik	4.98309	4.73529	5.89647	5.586	5.30021	1.84298	0.0243343
1433924_at	Peg3	4.56691	4.81826	5.46691	5.68184	5.13348	1.84266	0.0205103
1420143_at	Rc3h2	4.67022	4.86888	5.47484	5.82744	5.21034	1.84241	0.0249372
1417825_at	Esd	10.2843	10.1555	11.016	11.1866	10.6606	1.84216	0.015463
1447625_at	E2f5	8.67683	8.45511	9.63368	9.25753	9.00579	1.83992	0.0274199
1447742_at	Laptm5	6.05034	6.07196	7.11839	6.76264	6.50083	1.83957	0.0219473
1426965_at	Rap2a	6.64208	6.85405	7.35733	7.89676	7.18756	1.83908	0.0403534
1426893_at	C230093N12Rik	6.39309	6.59182	7.18679	7.55561	6.93183	1.83877	0.0262725
1456440_s_at	St8sia6	5.20727	5.12365	5.74402	6.34431	5.60481	1.83872	0.0431803
1427336_at	Aldh8a1	4.70091	4.48956	5.77212	5.17381	5.0341	1.83748	0.0465999
1436364_x_at	Nfix	6.95134	6.90712	7.81859	7.79529	7.36808	1.83746	0.0123475
1448656_at	Cacnb3	6.62178	6.69815	7.34877	7.7264	7.09878	1.83734	0.0238972
1419103_a_at	Abhd6	6.98763	6.72879	7.82504	7.64645	7.29698	1.83723	0.0198823
1422452_at	Bag3	6.41896	6.84321	7.47052	7.54669	7.06984	1.83721	0.0271962
1452730_at	Rps4y2	7.20282	6.59545	7.75323	7.79999	7.33787	1.83715	0.0436988
1427010_s_at	Lama5	5.28904	5.39255	6.24011	6.19623	5.77948	1.83702	0.0131166
1447922_at	n.a.*	6.37572	6.70169	7.54341	7.28861	6.97736	1.83694	0.0260004
1424358_at	Ube2e2	4.7694	4.71796	5.52078	5.72033	5.18212	1.83639	0.0154051
1432651_at	2510019K15Rik	5.886	5.91753	6.87364	6.68358	6.34019	1.83635	0.0149717
1418304_at	Pcdh21	5.77139	5.39155	6.19899	6.71728	6.0198	1.83613	0.0476828
1417018_at	Efemp2	5.5321	5.55077	6.55884	6.27664	5.97959	1.83566	0.018395
1426331_a_at	Frmd4b	5.22344	5.45472	6.11715	6.31254	5.77696	1.83498	0.0193575
1426528_at	Nrp2	5.21623	5.39832	6.14766	6.21773	5.74499	1.83454	0.0151313
1451446_at	Antxr1	6.13177	6.07074	7.03513	6.91716	6.5387	1.83387	0.0136188
1434414_at	Foxred2	4.97838	5.16103	6.2505	5.6385	5.5071	1.83375	0.0474949
1436562_at	Ddx58	8.15073	8.4607	9.09823	9.26244	8.74303	1.83353	0.0219315
1428405_at	Hcfc1r1	8.79206	8.36453	9.58262	9.32245	9.01542	1.83304	0.0330732
1428572_at	Basp1	8.68863	8.5118	9.47125	9.47747	9.03729	1.83292	0.0146704
1448149_at	Ctnna1	9.39312	9.37274	10.0723	10.4405	9.81966	1.83204	0.0231369
1435020_at	Sdccag1	4.78961	5.16608	5.70594	5.99643	5.41452	1.8319	0.0309132
1429094_at	Ddi2	5.72511	5.70517	6.66662	6.50985	6.15169	1.83158	0.0141981
1456890_at	Ddx58	6.02492	6.2333	6.98936	7.01495	6.56563	1.83153	0.0157088
1416342_at	Tnc	9.25208	8.84953	9.70594	10.1417	9.48731	1.83149	0.0424769
1458415_at	Clec2e	5.34115	5.08643	6.1996	5.97293	5.65003	1.8308	0.0215865
1433951_at	Arl5a	9.44086	9.53722	10.2312	10.4917	9.92523	1.83067	0.0183849
1425598_a_at	Lyn	6.45806	6.61214	7.4677	7.34723	6.97128	1.83066	0.0152665
1418888_a_at	Sepx1	8.51093	8.40834	9.45166	9.21164	8.89564	1.83021	0.0176244
1453327_at	Krt24	4.41652	4.71479	5.59594	5.27835	5.0014	1.82955	0.0279046
1452614_at	Bcl2l15	4.90484	4.6676	5.64091	5.6744	5.22194	1.82948	0.0167667
1416458_at	Arf2	6.5945	6.71899	7.25742	7.79617	7.09177	1.82773	0.0385662
1436345_at	5730559C18Rik	4.94338	4.94338	5.52423	6.1014	5.3781	1.82695	0.0411413
1444222_x_at	n.a.*	8.16212	8.23505	9.15694	8.97719	8.63282	1.82574	0.0154051
1458760_at	n.a.*	5.05482	4.93423	6.07279	5.65242	5.42856	1.82523	0.0283234
1451493_at	Ndfip1	9.12911	9.23072	9.98945	10.1056	9.61372	1.82464	0.0143267
1447538_at	n.a.*	5.75684	5.68421	6.79109	6.38464	6.15419	1.8243	0.0266468
1438536_at	5830411N06Rik	6.53551	6.64888	7.44686	7.4721	7.02584	1.82423	0.0136139
1453003_at	LOC100047936	6.40538	6.40645	7.22082	7.3233	6.83899	1.82278	0.0134135
1415936_at	Bcar3	6.39159	6.51002	7.44423	7.18854	6.8836	1.82207	0.0188846
1450027_at	Sdc3	7.20124	7.30816	8.0727	8.16784	7.68749	1.82206	0.0141555
1422903_at	Ly86	8.60794	8.24276	9.33599	9.24523	8.85798	1.82167	0.0241492
1417995_at	Ptpn22	9.65694	9.66349	10.537	10.5128	10.0925	1.82092	0.0126712
1453437_at	3321401G04Rik	4.58718	4.62295	5.51652	5.42075	5.03685	1.81954	0.0135234
1441680_at	n.a.*	6.22946	6.3226	7.04419	7.23465	6.70773	1.81931	0.0161964
1438588_at	Plagl1	5.74725	5.23813	6.51511	6.19687	5.92434	1.81919	0.0444904
1443993_at	Zc3h12a	4.82681	5.03407	5.8505	5.73692	5.36207	1.81915	0.0170975
1420942_s_at	Rgs5	6.2118	6.27914	6.94927	7.26806	6.67707	1.81906	0.0213302
1448181_at	Klf15	5.90233	5.78797	6.67432	6.74225	6.27672	1.81899	0.0140446
1456918_at	Raph1	5.33135	5.43882	6.13276	6.36283	5.81644	1.81845	0.0178333
1417632_at	Atp6v0a1	6.24897	6.17983	7.23733	6.9165	6.64566	1.8182	0.0214958
1445582_at	LOC100045340	4.63209	4.78173	5.52086	5.61769	5.13809	1.81802	0.0152081
1459157_at	Stox2	4.75481	4.72189	5.3914	5.81002	5.16953	1.81801	0.0274835
1425525_a_at	P2rx4	7.09053	7.25073	7.92555	8.14042	7.60181	1.81801	0.018458
1417790_at	Dok1	6.9055	7.12453	7.82023	7.93425	7.44613	1.81784	0.0175546
1457251_x_at	n.a.*	6.77917	6.89975	7.89047	7.51254	7.27048	1.81762	0.025941
1443726_at	Smyd1	5.44588	5.74851	6.46532	6.45312	6.02821	1.81759	0.0201899
1458675_at	n.a.*	4.63652	4.54263	5.58497	5.31792	5.02051	1.8174	0.0191575
1428186_at	Kctd6	6.84912	6.64448	7.34197	7.87519	7.17769	1.81728	0.0413704
1451124_at	Sod1	9.75995	9.43864	10.347	10.5749	10.0301	1.8171	0.0257593
1451232_at	Cd151	6.85406	6.5705	7.63436	7.51345	7.1431	1.81708	0.0205103
1452767_at	Rrbp1	7.75297	8.02182	8.69201	8.8051	8.31797	1.8165	0.0196692
1419410_at	Batf	6.99223	6.87085	7.77605	7.80845	7.3619	1.81593	0.0140006
1437804_at	Igfbp7	6.41388	5.96647	7.23689	6.86456	6.62045	1.81573	0.042755
1451789_a_at	Ryk	6.05836	6.05836	6.91208	6.92565	6.48862	1.81567	0.0127824
1448631_a_at	Hipk2	7.25629	7.30588	8.09274	8.19039	7.71133	1.81564	0.0137343
1425412_at	Nlrp3	5.89839	5.66838	6.51039	6.77691	6.21352	1.81537	0.0229911
1447842_x_at	n.a.*	9.07934	8.93018	9.93264	9.79718	9.43484	1.81523	0.0160461
1420428_at	Ager	5.67895	5.70328	6.32386	6.77816	6.12106	1.81491	0.0303748
1422925_s_at	Acot3	5.55205	5.29341	6.40096	6.16365	5.85252	1.8145	0.0229749
1424312_at	Adipor1	6.04152	5.97884	6.68833	7.051	6.43992	1.81438	0.0240395
1439530_a_at	Ppp1r13l	6.35921	6.24616	6.91238	7.41184	6.7324	1.81431	0.0355991
1452280_at	Farp1	5.42589	5.8147	6.34076	6.61859	6.04999	1.81426	0.0324515
1424157_at	Ehd2	5.38592	5.45145	6.58673	5.96888	5.84825	1.81393	0.0474949
1445781_at	n.a.*	4.75712	4.57643	5.51016	5.53901	5.09568	1.81228	0.0155657
1434137_x_at	1810010M01Rik	5.60879	5.65089	6.54101	6.43397	6.05867	1.81208	0.0139086
1430754_at	4930511H11Rik	4.91373	5.01046	5.96148	5.67627	5.39049	1.81099	0.0204291
1435254_at	Plxnb1	5.83457	5.94267	6.52042	6.97029	6.31699	1.81094	0.0313509
1456022_at	Hipk2	6.58273	6.63024	7.57132	7.35482	7.03478	1.81074	0.0168381
1424424_at	Slc39a1	7.542	7.10896	8.23501	8.12883	7.7537	1.81056	0.0299279
1432494_a_at	1700019E19Rik	5.43122	5.13543	6.28352	5.99267	5.71071	1.80847	0.0277252
1417063_at	C1qb	8.97197	8.93859	9.64081	9.97879	9.38254	1.80816	0.0225808
1455477_s_at	Pdzk1ip1	4.96614	4.74007	5.84052	5.57406	5.2802	1.80773	0.0232468
1457270_at	Gas7	5.43417	5.17075	5.9301	6.3831	5.72953	1.80769	0.0372878
1435572_at	2310014L17Rik	5.16597	5.22189	6.20914	5.88697	5.62099	1.80766	0.0218861
1425216_at	Ffar2	5.11492	5.14071	6.26909	5.69432	5.55476	1.80737	0.0427865
1449680_at	C80678	4.52787	4.66154	5.44154	5.45451	5.02137	1.80665	0.014493
1432845_at	n.a.*	4.85079	5.061	5.81153	5.80658	5.38247	1.80646	0.016607
1420183_at	Lor	4.93145	5.072	5.75544	5.95408	5.42824	1.80629	0.0178801
1423724_at	Zwint	8.70159	8.70287	9.35106	9.75937	9.12872	1.80623	0.0274199
1455550_x_at	Serinc3	11.2408	11.6234	12.1585	12.4115	11.8586	1.80607	0.0313608
1453386_at	Tusc1	6.44206	6.31388	7.23434	7.22718	6.80436	1.80599	0.0143684
1417406_at	Sertad1	7.31985	7.69633	8.39713	8.32323	7.93413	1.80512	0.0257593
1450957_a_at	Sqstm1	9.28028	9.65273	10.1062	10.5309	9.89253	1.80507	0.0418615
1421453_at	Jph2	5.10091	5.08631	5.96295	5.92829	5.51962	1.80501	0.0132188
1430424_at	4933433C11Rik	4.75476	4.86531	5.60084	5.72317	5.23602	1.80496	0.0153018
1448908_at	Ppap2b	6.57892	6.74384	7.53546	7.4896	7.08696	1.80393	0.0155286
1435595_at	1810011O10Rik	5.05383	5.64004	6.29204	6.10347	5.77235	1.80353	0.0479421
1436482_a_at	Sdc3	5.01429	4.74695	5.85234	5.60978	5.30584	1.80305	0.0241975
1433670_at	Emp2	6.402	6.4278	7.13483	7.3927	6.83933	1.80108	0.0187636
1418237_s_at	Col18a1	5.84958	5.9046	6.51001	6.9417	6.30147	1.80096	0.0297336
1448713_at	Stat4	7.56363	7.64664	8.24027	8.66584	8.02909	1.79991	0.0296589
1419350_at	Hook2	5.63209	5.87362	6.43496	6.76654	6.1768	1.79988	0.0278781
1424113_at	Lamb1-1	5.80748	5.68496	6.49915	6.68907	6.17016	1.79987	0.0174767
1434775_at	Pard3	5.24529	5.11268	6.09862	5.95407	5.60267	1.7992	0.0164398
1418289_at	Nes	5.39698	5.42013	6.37303	6.13874	5.83222	1.79917	0.0178605
1434651_a_at	Cldn3	6.28822	6.3199	7.06539	7.23502	6.72713	1.79769	0.0158129
1420851_at	Pard6g	9.18312	9.01311	9.70851	10.1791	9.52097	1.79714	0.0359278
1427912_at	Cbr3	6.1364	5.99141	6.66615	7.15268	6.48666	1.7969	0.0366023
1452732_at	Asprv1	5.57353	5.74709	6.51349	6.49575	6.08246	1.7954	0.0159449
1416368_at	Gsta4	6.58799	6.4819	7.29755	7.46027	6.95693	1.79498	0.0165289
1419406_a_at	Bcl11a	5.78794	5.59585	6.7332	6.33817	6.11379	1.79476	0.030538
1435212_at	P2rx2	4.72516	4.65946	5.54406	5.52791	5.11415	1.79461	0.0137863
1444824_at	C76793	4.87511	4.99039	5.9176	5.63523	5.35458	1.79461	0.0214136
1457252_x_at	Pld2	5.6307	5.98654	6.73238	6.5721	6.23043	1.79454	0.0268949
1450408_at	Clcn7	6.28115	6.68874	7.39666	7.26038	6.90673	1.79449	0.0297452
1421151_a_at	Epha2	5.56598	5.70394	6.43026	6.52655	6.05668	1.79433	0.0158129
1438648_x_at	1190003M12Rik	5.46563	5.48762	6.23554	6.40432	5.89828	1.79416	0.0158632
1426779_x_at	Dag1	7.5843	7.51254	8.47346	8.30871	7.96975	1.79336	0.0161445
1454617_at	Arrdc3	6.87248	7.13912	7.69028	8.00474	7.42666	1.79218	0.0285311
1448871_at	Mapk13	5.71408	5.62259	6.49888	6.52105	6.08915	1.79207	0.0142164
1422704_at	Gyk	7.18359	7.34364	7.87369	8.336	7.68423	1.79158	0.0352396
1436383_at	Cplx2	4.46895	4.74669	5.48511	5.41285	5.0284	1.79149	0.0206249
1419990_at	A830082K12Rik	6.04715	5.96647	6.89772	6.79818	6.42738	1.79147	0.0148706
1424444_a_at	1600014C10Rik	8.01634	8.19741	9.03215	8.86347	8.52734	1.79122	0.0186843
1451767_at	Ncf1	5.30497	5.3817	6.17164	6.19649	5.7637	1.79095	0.0140854
1448788_at	Cd200	6.40225	6.3199	7.30099	7.10248	6.7814	1.79086	0.0174564
1418346_at	Insl6	6.3862	6.2228	7.06227	7.22679	6.72451	1.79009	0.0181221
1460695_a_at	2010111I01Rik	8.16152	8.26074	9.09665	9.00493	8.63096	1.78963	0.0151313
1443476_at	n.a.*	5.49814	5.12616	6.23924	6.06424	5.73195	1.78954	0.0285814
1455506_at	Slc25a34	4.62932	4.81224	5.71633	5.40339	5.14032	1.78891	0.0252319
1418156_at	Kcne4	5.47899	5.68244	6.61536	6.2219	5.99967	1.78747	0.031393
1455975_x_at	Zfp313	9.56874	9.8852	10.4854	10.644	10.1458	1.78721	0.0247014
1437834_s_at	Pacsin3	5.58668	5.4847	6.33581	6.41063	5.95446	1.78698	0.0150274
1436693_x_at	Slc35e4	6.07537	6.12063	6.98183	6.88922	6.51676	1.78698	0.0145723
1422974_at	Nt5e	5.77925	5.90454	6.63284	6.72558	6.26055	1.78672	0.0157602
1435263_at	Tmem106a	6.20882	6.27145	7.12286	7.0304	6.65838	1.78571	0.0147797
1420593_a_at	Tead3	6.35952	5.98205	7.12424	6.88943	6.58881	1.78515	0.0317378
1451359_at	Lpcat1	6.36711	6.57909	7.08158	7.53663	6.8911	1.7851	0.0370269
1425638_at	Centa2	4.93333	4.51271	5.66888	5.44876	5.14092	1.78485	0.0343829
1449221_a_at	Rrbp1	6.85054	6.88905	7.58933	7.82047	7.28735	1.78398	0.0184779
1426123_a_at	Rrbp1	5.66965	5.73082	6.41896	6.65166	6.11777	1.78395	0.0187288
1449133_at	Sprr1a	5.43349	5.36412	6.1118	6.35551	5.81623	1.78367	0.0193486
1460409_at	Cpt1a	8.46814	8.07597	8.98223	9.23137	8.68943	1.78354	0.0336113
1437241_at	Klf11	5.98871	6.13745	6.80758	6.98793	6.48042	1.78346	0.0184779
1460305_at	Itga3	4.79066	4.91265	5.4771	5.89501	5.26886	1.78312	0.03103
1455639_at	Slc25a39	4.79223	4.80784	5.71811	5.55047	5.21716	1.78294	0.0162142
1434774_at	Rhbdf2	6.95748	6.99197	7.89439	7.72308	7.39173	1.78263	0.0164202
1459340_at	n.a.*	4.88072	5.10213	5.83775	5.81297	5.40839	1.78253	0.0180948
1460559_at	Ankrd25	5.35044	5.52069	6.31174	6.22634	5.8523	1.78197	0.0169023
1428050_a_at	Tmbim4	7.98827	7.8375	8.6806	8.8115	8.32947	1.78159	0.0172925
1435342_at	Kcnk6	7.4382	7.19748	7.88796	8.41365	7.73432	1.78134	0.0458011
1451159_at	Arhgef12	7.0173	7.51664	8.04269	8.1571	7.68343	1.78129	0.0385409
1421167_at	Atp11a	5.44481	5.294	6.29256	6.11195	5.78583	1.7812	0.0186208
1427320_at	Copg2as2	4.85442	4.69991	5.84561	5.37429	5.19356	1.78111	0.0367962
1442989_at	n.a.*	5.45148	5.4224	6.30563	6.23305	5.85314	1.78065	0.0143872
1435188_at	Gm129	5.80658	5.48415	6.58233	6.37315	6.06155	1.78061	0.0273219
1450513_at	Cd33	4.77319	4.75157	5.56056	5.62851	5.17846	1.78035	0.0143072
1449041_a_at	Trip6	6.16759	6.07221	6.78861	7.1149	6.53583	1.77997	0.0241863
1449449_at	Ptges	4.76181	4.78279	5.63651	5.57149	5.18815	1.77978	0.0142918
1419169_at	Mapk6	8.86926	8.67938	9.37802	9.83129	9.18949	1.7781	0.0366251
1448352_at	Luzp1	5.90459	5.71339	6.8318	6.44476	6.22364	1.77681	0.0312197
1434758_at	Crispld2	5.58284	5.92123	6.6447	6.51735	6.16653	1.77644	0.0260195
1415894_at	Enpp2	6.91493	7.00919	7.67105	7.91093	7.37653	1.77637	0.0199199
1421922_at	Sh3bp5	6.4428	6.39222	7.18146	7.31138	6.83197	1.77634	0.0157392
1419923_at	n.a.*	5.43439	5.13247	6.30694	5.91765	5.69786	1.77629	0.0368868
1436326_at	Rora	5.67842	5.97223	6.58971	6.71604	6.2391	1.77467	0.0232868
1458075_at	n.a.*	5.267	5.28193	5.96657	6.2366	5.68803	1.77414	0.020665
1448759_at	Il2rb	6.00002	6.47662	7.03245	7.09796	6.65177	1.77385	0.0360542
1426778_at	Dag1	7.6985	7.89519	8.53	8.7171	8.2102	1.77363	0.0207584
1460556_at	n.a.*	8.06201	8.52361	9.01876	9.2179	8.70557	1.77217	0.0383678
1429401_at	Stox2	5.33597	4.97475	6.11715	5.84308	5.56774	1.77123	0.0336005
1416234_at	Lrrc59	8.86913	8.61761	9.47148	9.66371	9.15548	1.77058	0.0233102
1459860_x_at	Trim2	4.91774	5.3301	6.09427	5.80157	5.53592	1.77031	0.0388958
1447708_x_at	Pde2a	7.34809	7.45491	8.30651	8.14434	7.81346	1.77021	0.017561
1456843_at	Yes1	5.48415	5.2611	6.39773	5.99418	5.78429	1.76949	0.034389
1443021_at	Mthfs	5.00053	4.94193	5.6495	5.9396	5.38289	1.76947	0.0221379
1421193_a_at	Pbx3	5.36663	5.61001	6.11849	6.50392	5.89976	1.76894	0.0340088
1426543_x_at	Endod1	5.68331	5.62244	6.421	6.53024	6.06425	1.76877	0.0156987
1451261_s_at	Stap2	6.65739	6.58955	7.61692	7.27519	7.03476	1.76857	0.0255705
1420760_s_at	Ndrg1	7.70525	7.73837	8.33311	8.75497	8.13292	1.76814	0.0311384
1415919_at	Npdc1	5.1992	5.2448	5.90517	6.18255	5.63293	1.76769	0.0215167
1437801_at	Morf4l1	7.96983	8.02797	8.89372	8.74752	8.40976	1.76751	0.0165128
1450005_x_at	Dlk2	5.11889	4.97477	5.82221	5.91463	5.45762	1.76735	0.0168985
1426258_at	Sorl1	7.72039	7.83125	8.59734	8.59734	8.18658	1.76727	0.0154554
1452590_a_at	Plac9	7.00926	6.77584	7.85941	7.56834	7.30322	1.76702	0.0274056
1415853_at	Def8	6.20675	6.19627	6.83271	7.21276	6.61212	1.76691	0.0278615
1434115_at	Cdh13	5.59427	5.52265	6.43784	6.32078	5.96888	1.76645	0.0160932
1420807_a_at	Dlk2	5.34352	5.52148	6.48969	6.01572	5.8426	1.76565	0.0394203
1416304_at	Litaf	7.08477	7.19305	8.23023	7.68663	7.54867	1.76482	0.0448152
1449706_s_at	Nr5a2	4.97831	5.15583	6.13703	5.63477	5.47648	1.76397	0.042375
1452068_at	Asahl	5.97997	5.68515	6.4135	6.88908	6.24192	1.76386	0.0455357
1450165_at	Slfn2	9.89213	9.85115	10.6961	10.6847	10.281	1.76385	0.0146704
1437329_at	Ptplb	5.45472	5.74876	6.23571	6.60299	6.01054	1.76248	0.0360211
1447621_s_at	Tmem173	6.68876	6.58939	7.50945	7.40372	7.04783	1.76236	0.0164202
1426587_a_at	Stat3	9.39205	9.64221	10.4687	10.1998	9.9257	1.76191	0.027329
1444507_at	Usp53	5.8722	6.24619	6.65833	7.09375	6.46762	1.76155	0.0475437
1436207_at	Tcf3	6.06437	5.86754	6.86434	6.70101	6.37432	1.7614	0.0206135
1454630_at	Samd14	5.41969	5.18513	6.03567	6.20081	5.71032	1.76031	0.0221379
1452362_at	Trim16	5.97009	5.94555	6.70204	6.8451	6.36569	1.76022	0.0164931
1424780_a_at	Reep3	7.91894	8.23638	8.75827	9.02737	8.48524	1.75949	0.0312395
1458957_at	n.a.*	5.30295	5.55534	6.33854	6.14806	5.83622	1.75828	0.0240155
1446067_at	n.a.*	4.66661	4.9961	5.78421	5.5059	5.2382	1.75771	0.0327452
1443828_x_at	Herpud2	5.42628	5.47023	6.25003	6.27346	5.855	1.75746	0.0149114
1437832_x_at	Wars	6.53991	6.63541	7.4245	7.37754	6.99434	1.7573	0.015774
1449038_at	Hsd11b1	8.98226	9.43731	10.1314	9.91461	9.61641	1.75715	0.0399603
1447377_at	Gm428	4.7747	4.91119	5.79364	5.51839	5.24948	1.75694	0.0235302
1448513_a_at	Npc2	11.5181	11.7131	12.2829	12.5737	12.0219	1.75643	0.0265155
1433061_at	4933423L19Rik	4.78585	5.10944	5.94813	5.57223	5.35391	1.7563	0.0392386
1448704_s_at	H47	9.38109	9.36645	10.0985	10.2739	9.78	1.75621	0.0175655
1456868_at	n.a.*	5.357	5.76612	6.42988	6.3179	5.96772	1.75604	0.0322764
[truncated: 1,092 more rows]
